# Supplementary material for: Systematic Global Analysis of Genes Encoding Protein Phosphatases inAspergillus fumigatus
Source: Oxford University Press journal article supplement (doi:10.1534/g3.115.016766), 2015-05-12
Supplement: 016766_figures1.pdf [file 016766_figures1.pdf]

A.

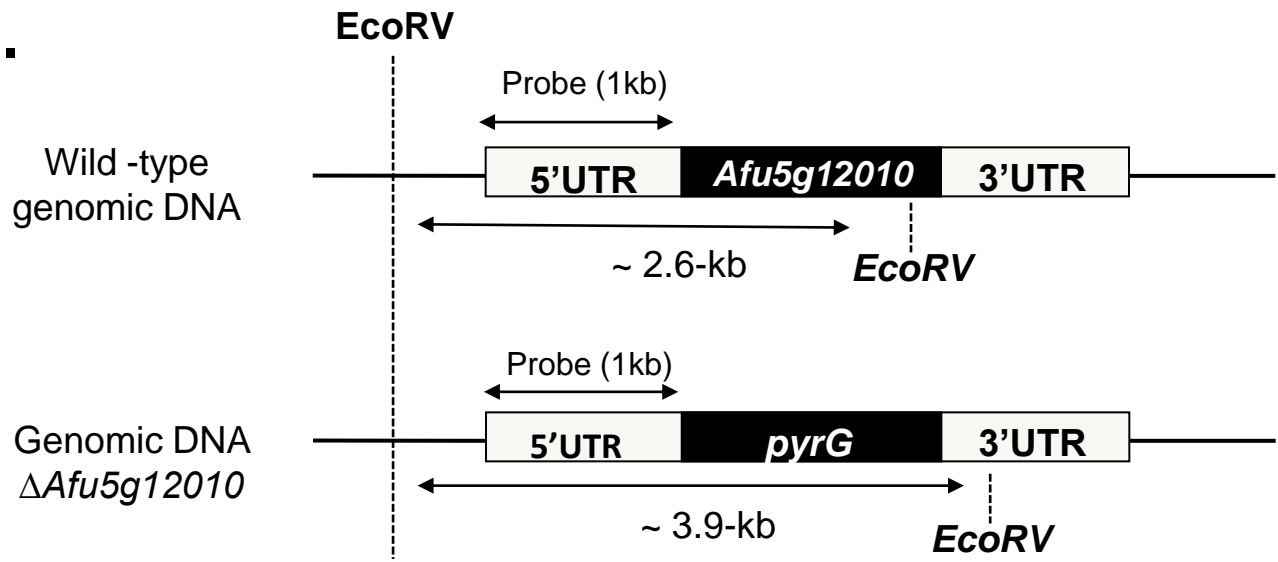

### **Afu5g12010**

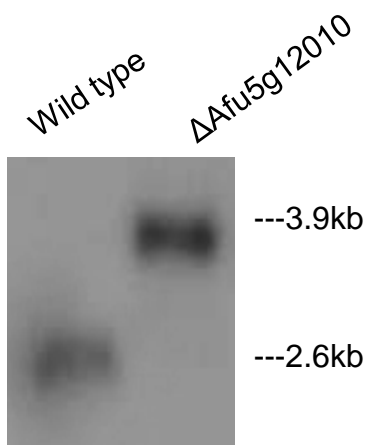

**B.**

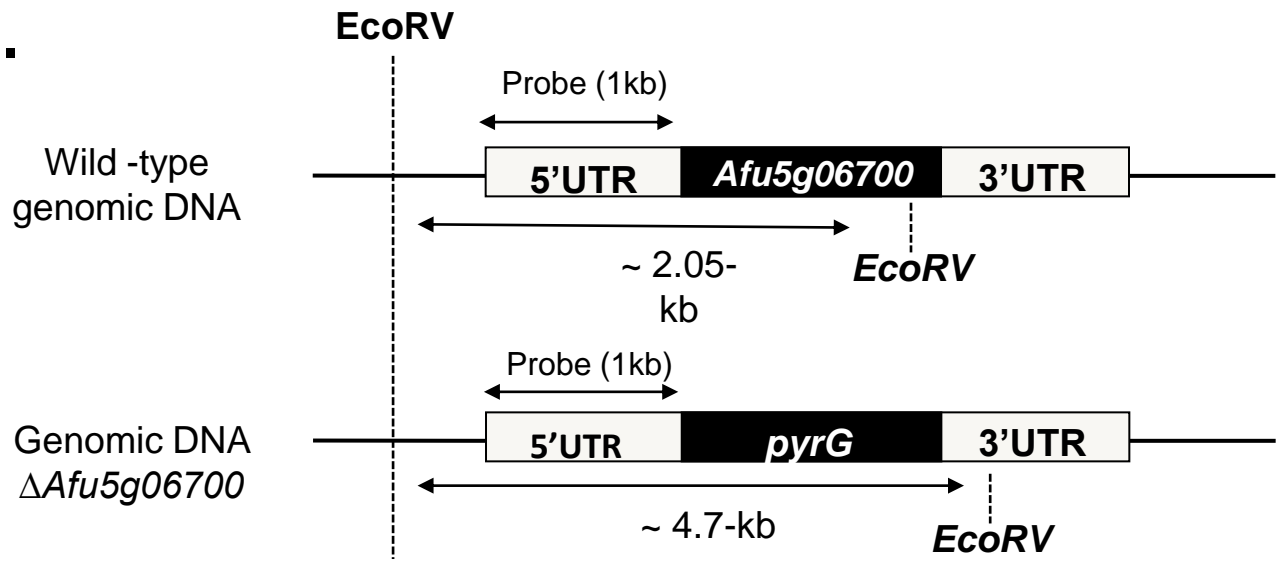

**Afu5g06700**

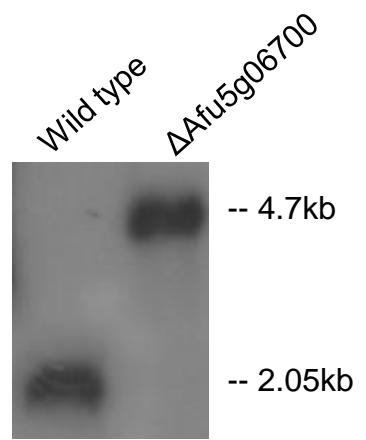

**C.**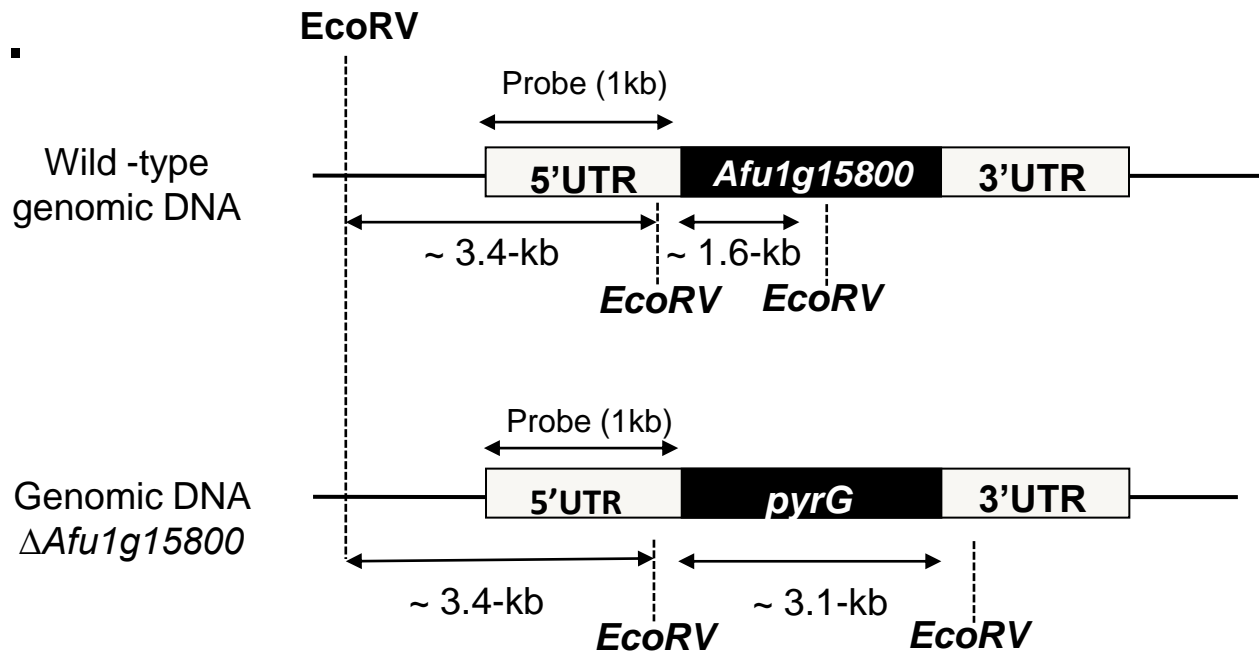

### **Afu1g15800**

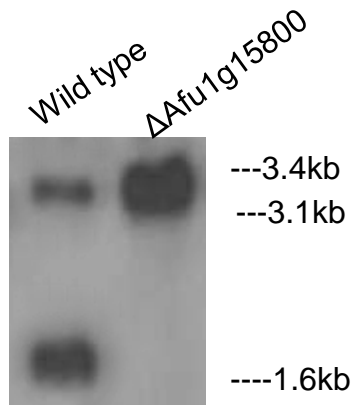

D.

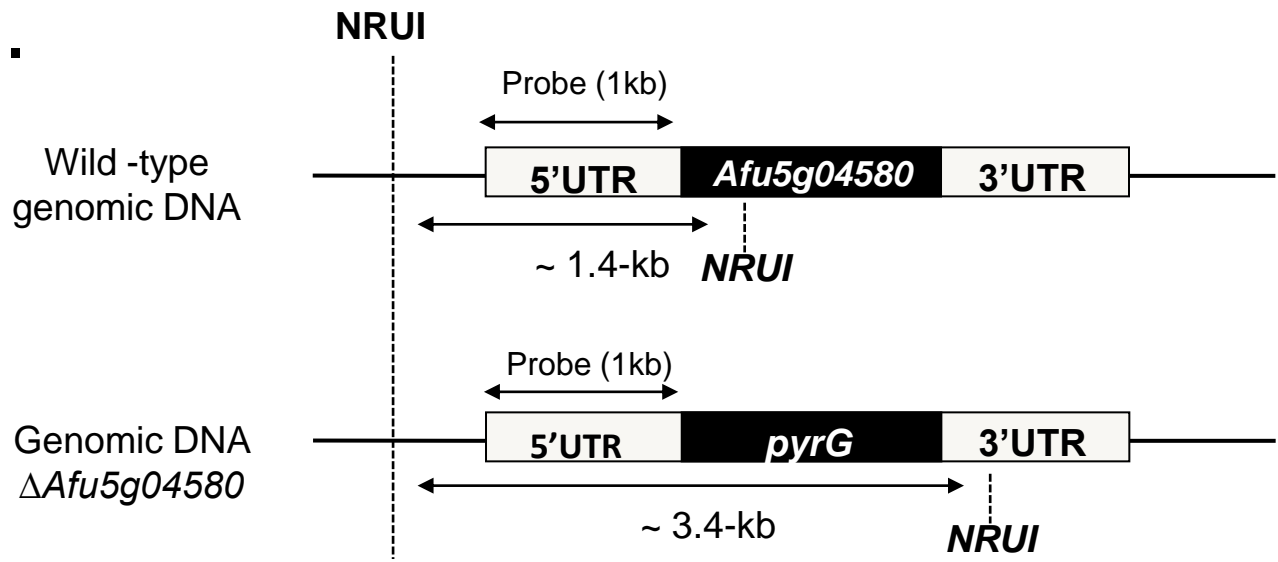

### Afu5g04580

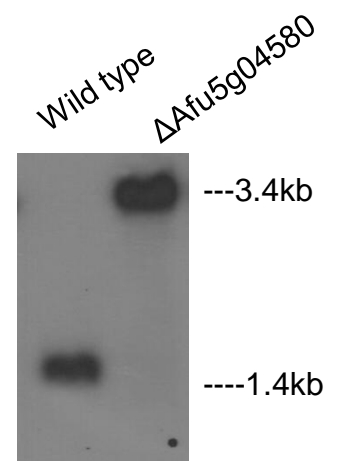

E.

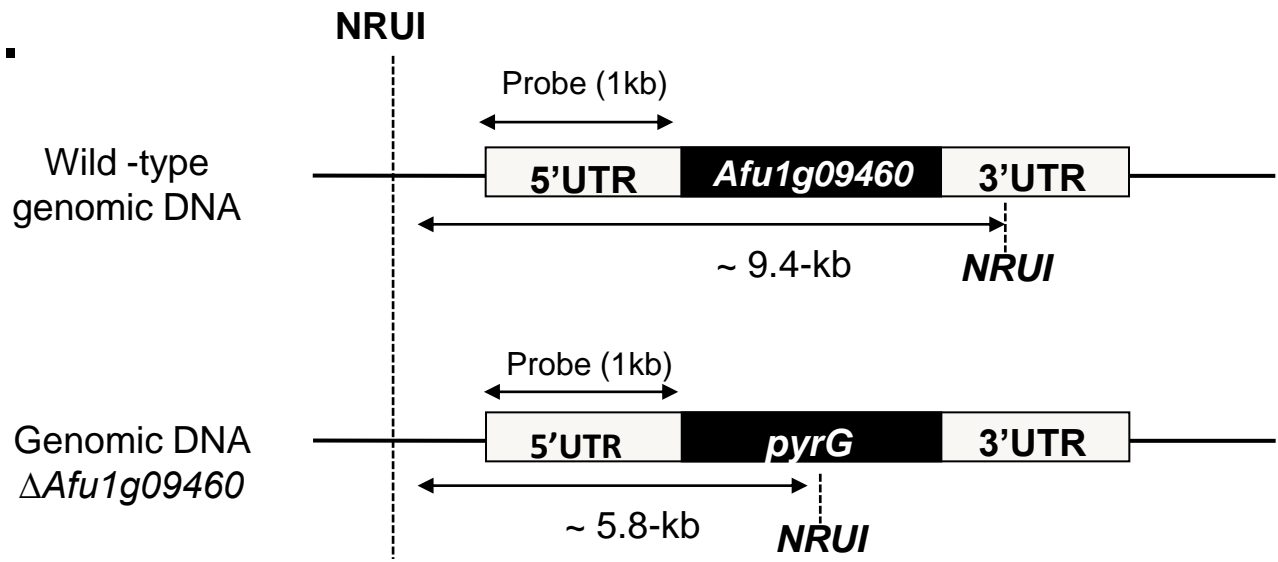

### **Afu1g09460**

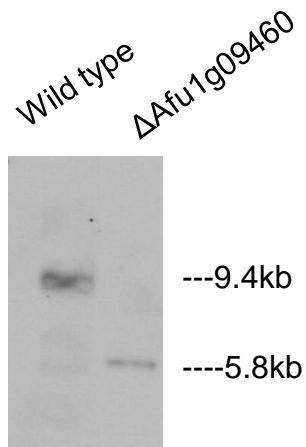

**F.**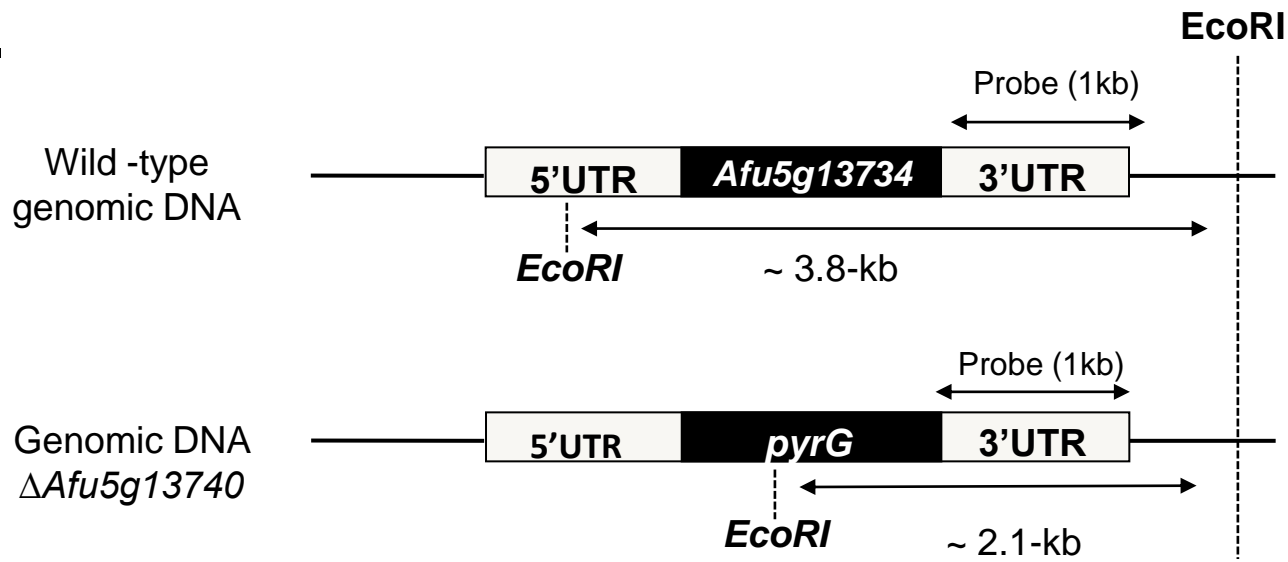

### **Afu5g13740**

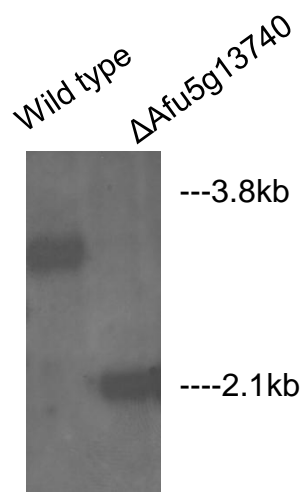

**G.**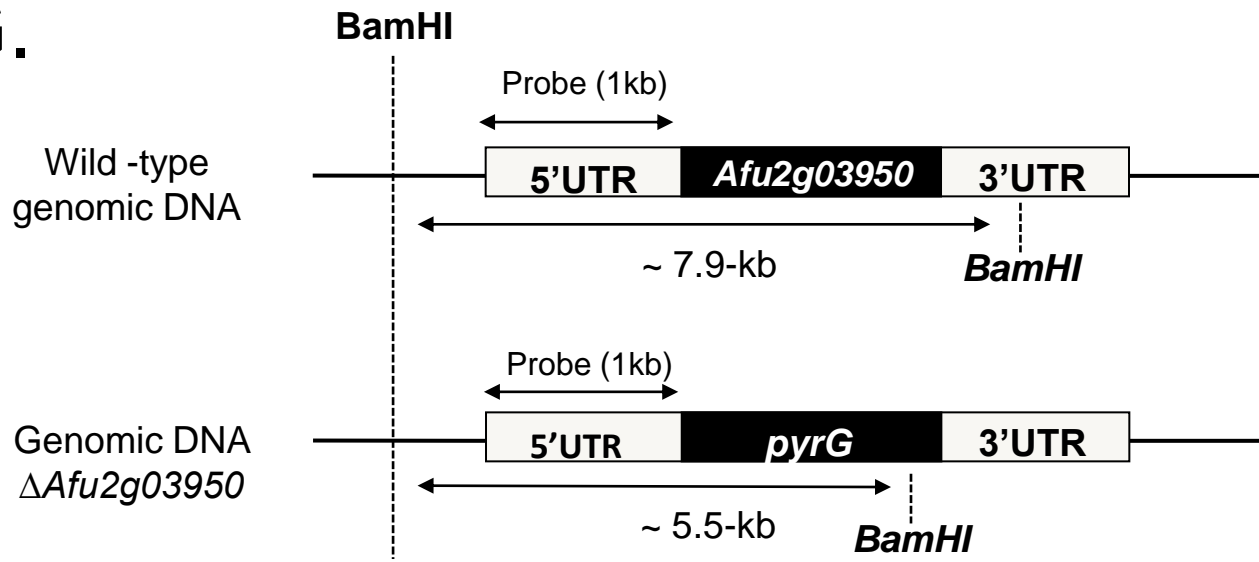**Afu2g03950**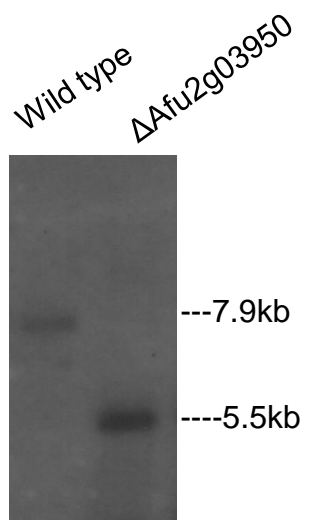

# H.

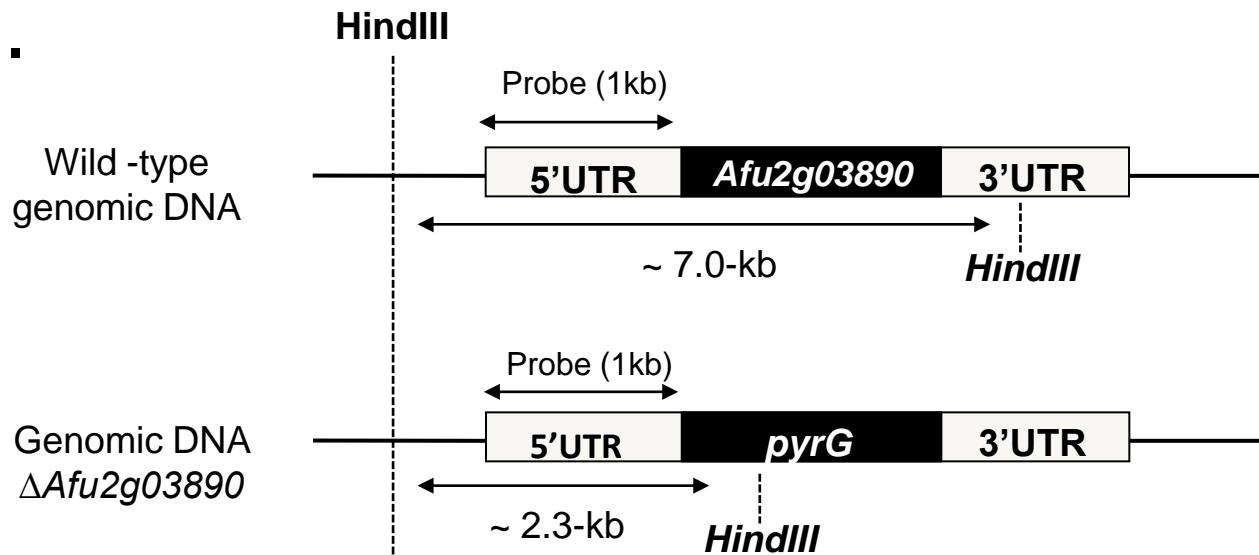

## Afu2g03890

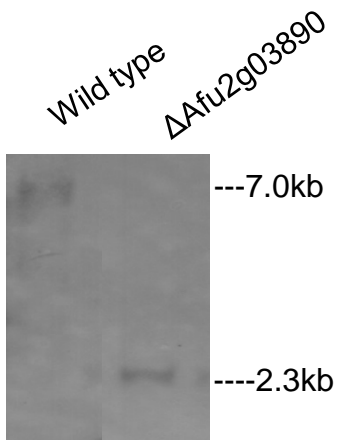



I.

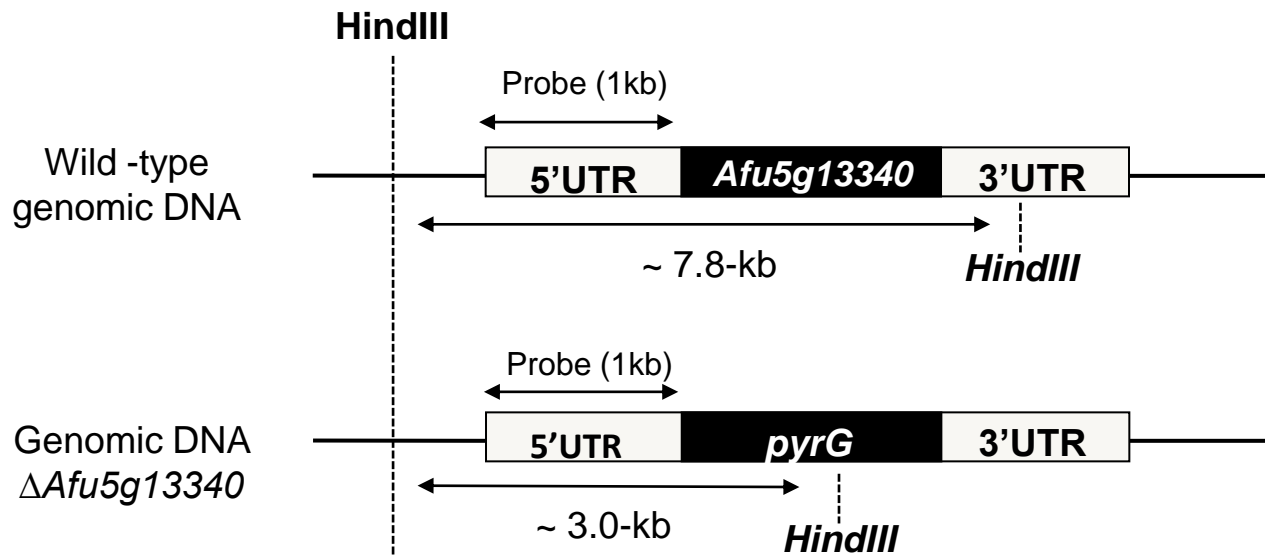

## Afu5g1334

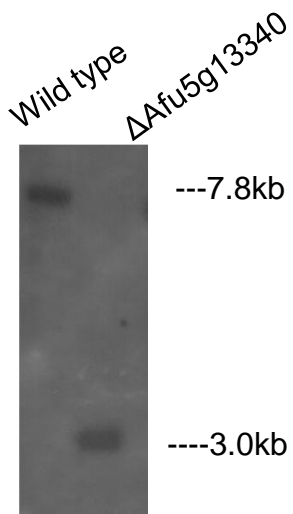

J.

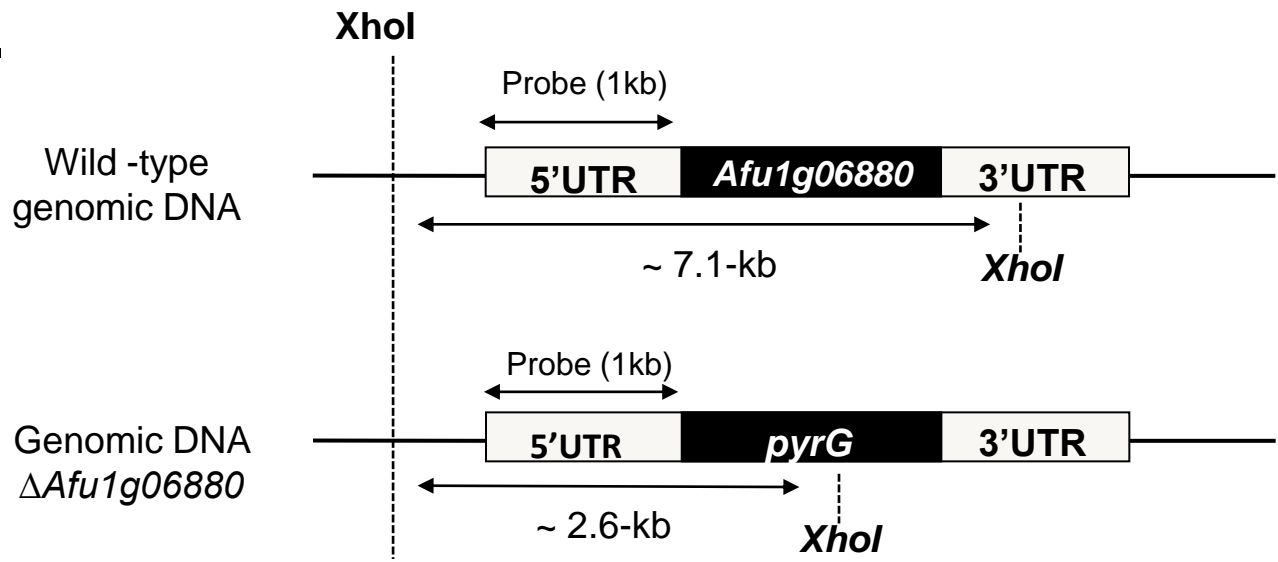

### **Afu1g06880**

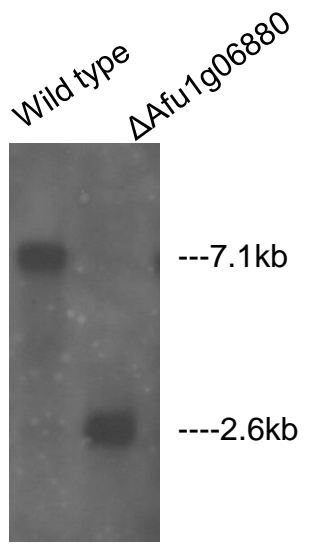

# K.

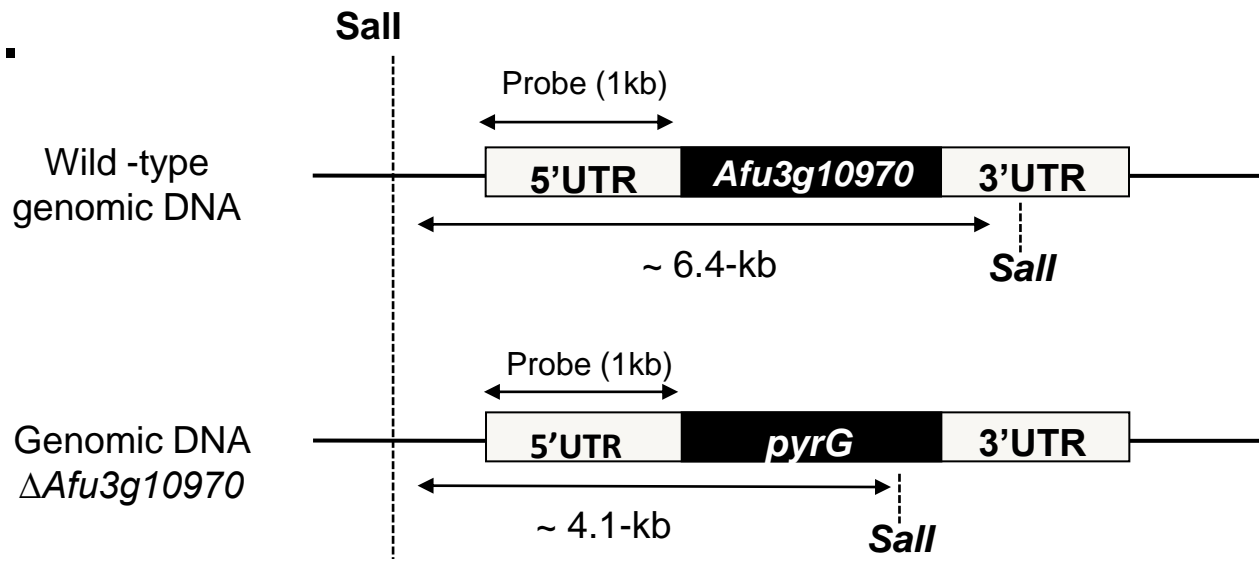

## Afu3g10970

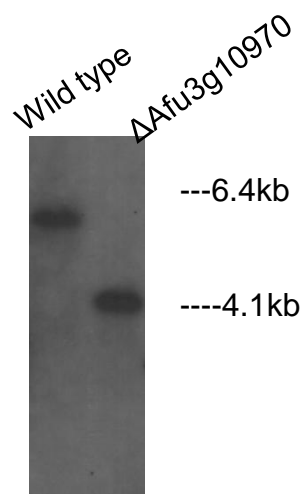

L.

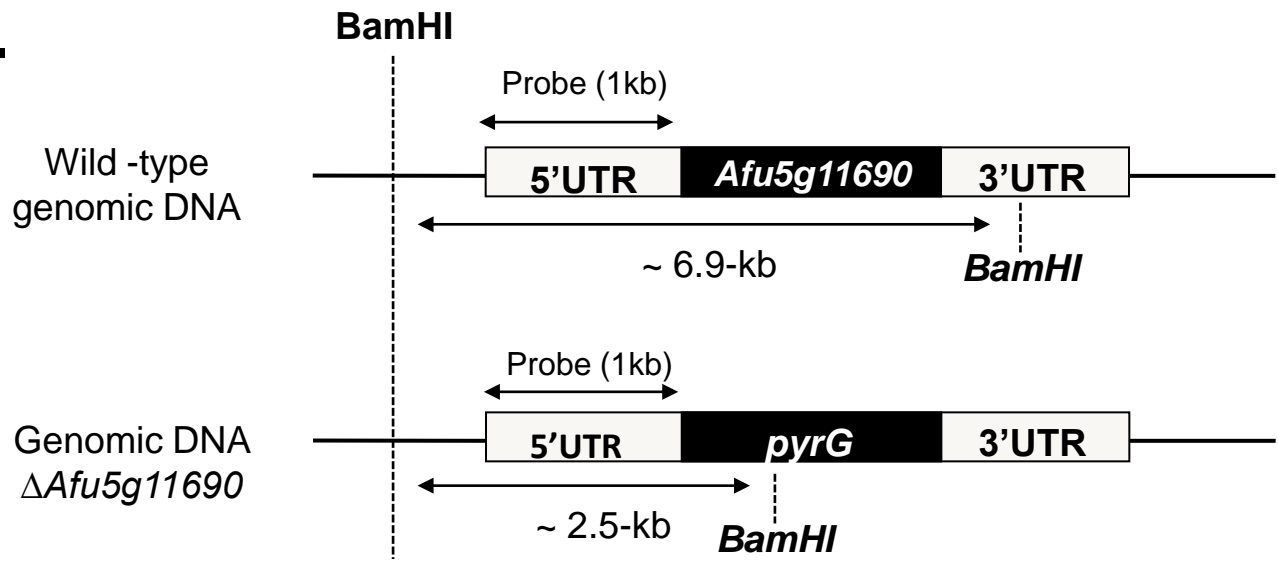

### Afu5g11690

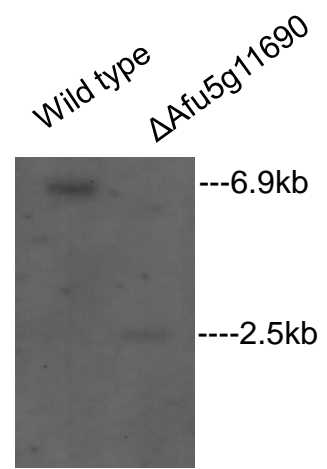

M.

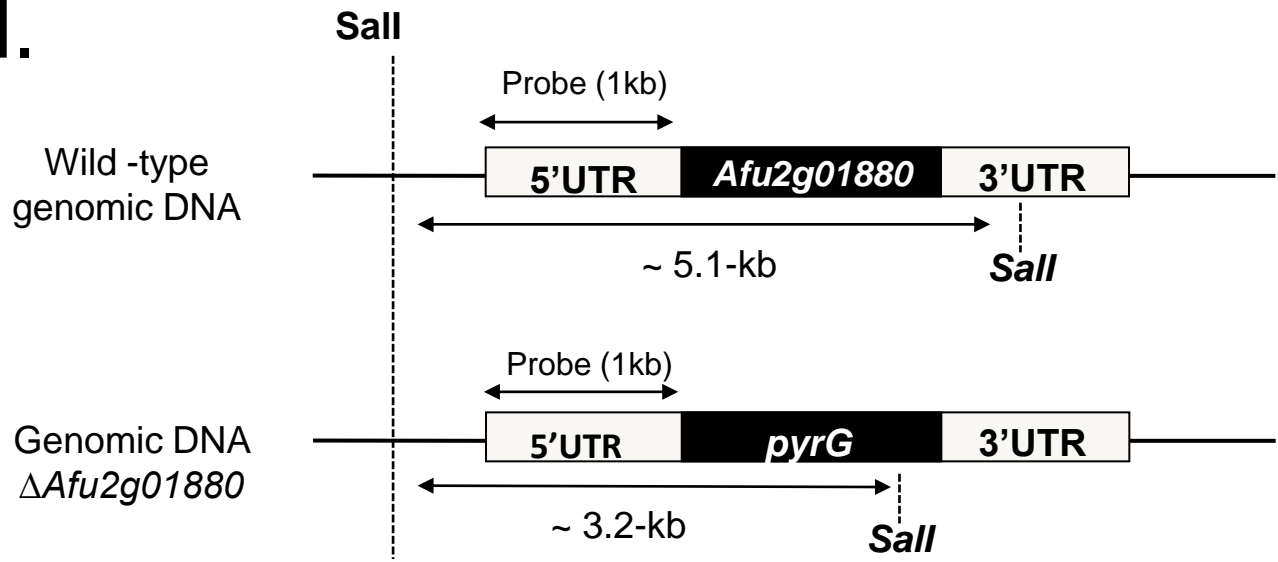

### Afu2g01880

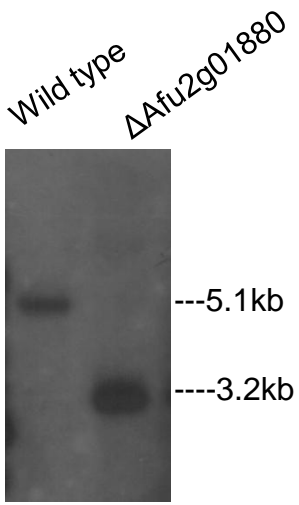

# N.

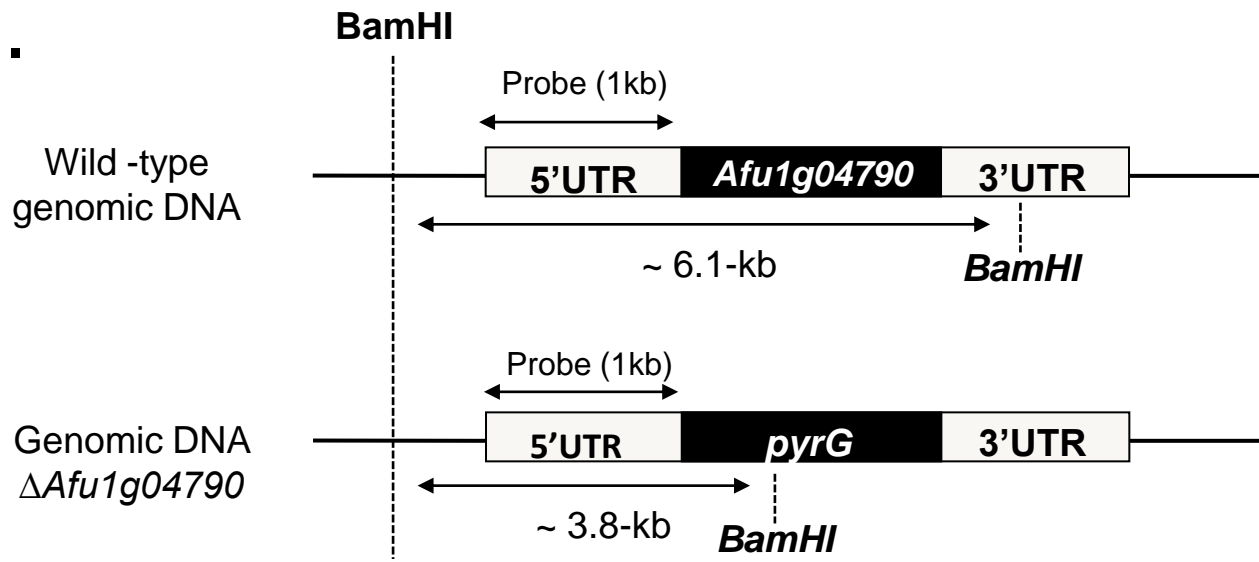

## Afu1g04790

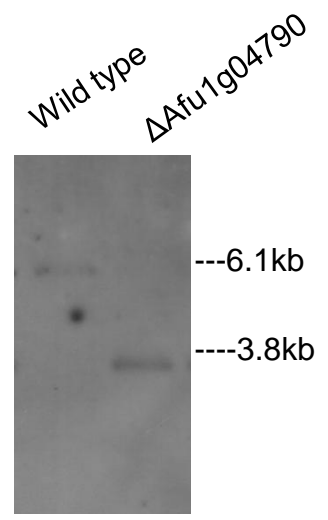

O.

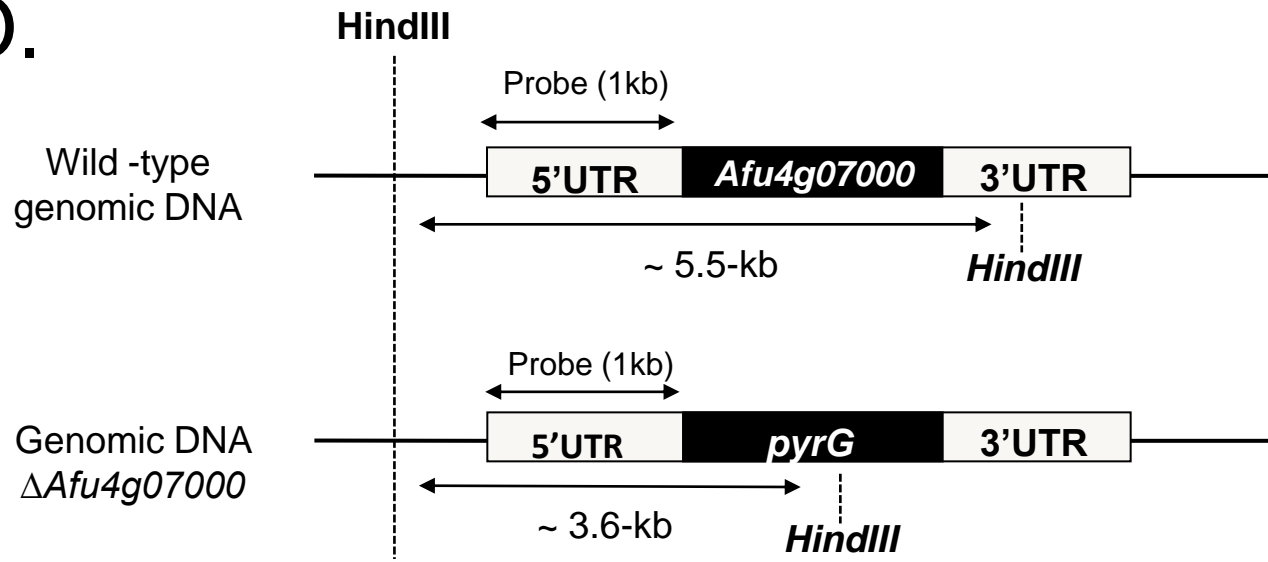

### Afu4g07000

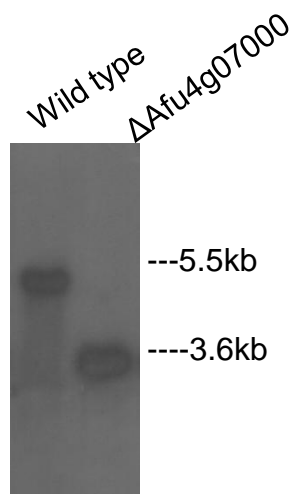

P.

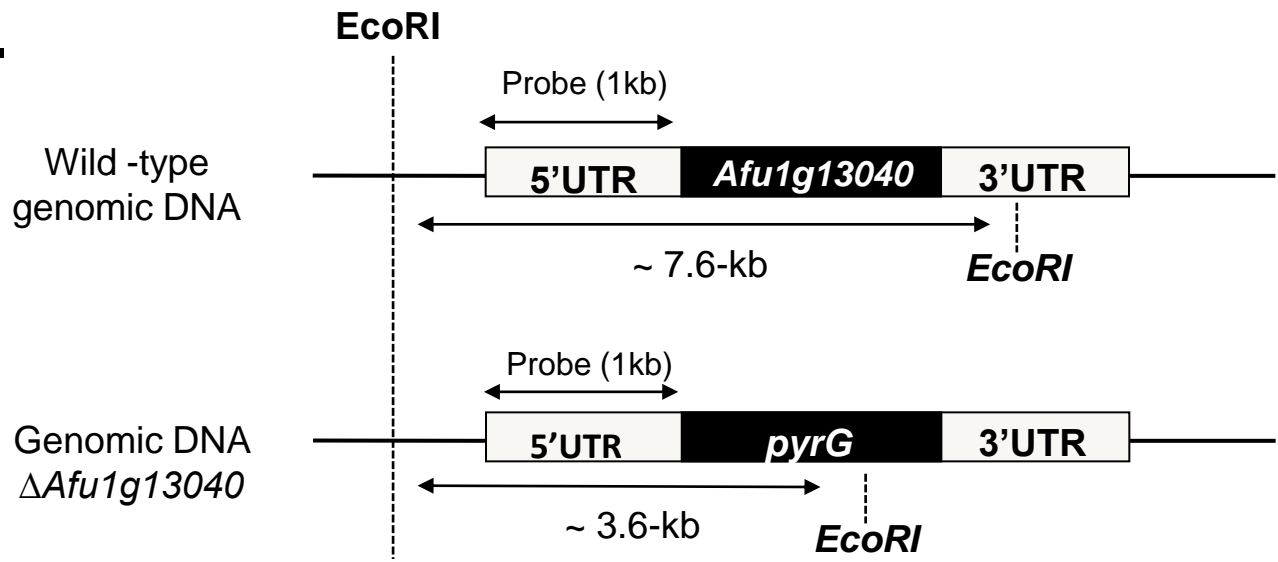

### **Afu1g13040**

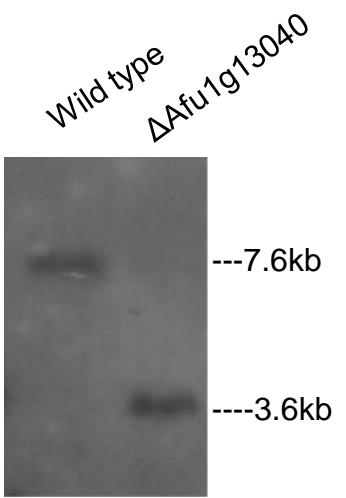



Q.

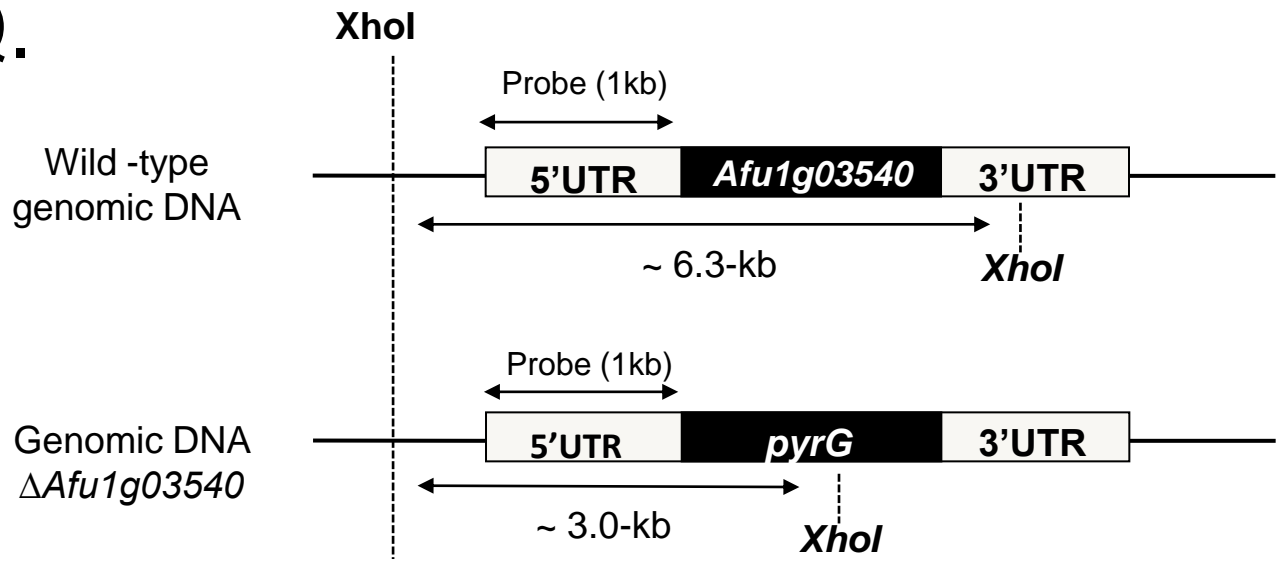

### Afu1g03540

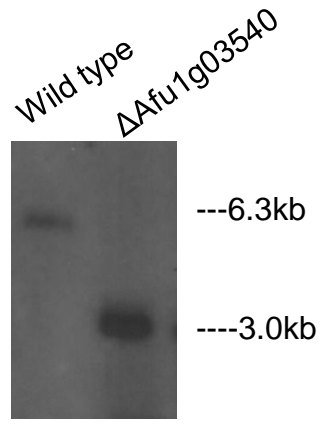

R.

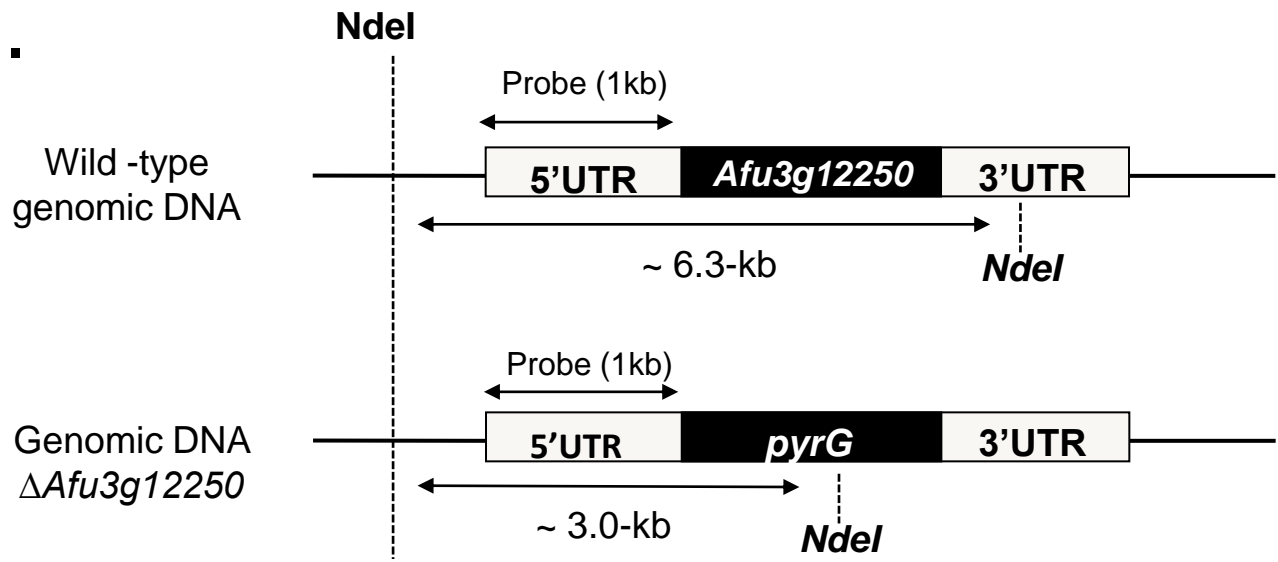

### **Afu3g12250**

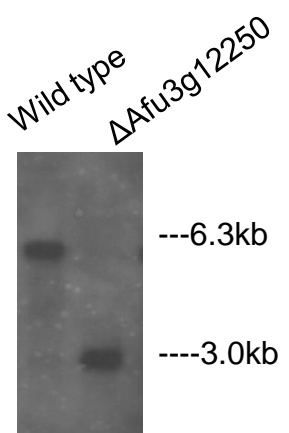

# S.

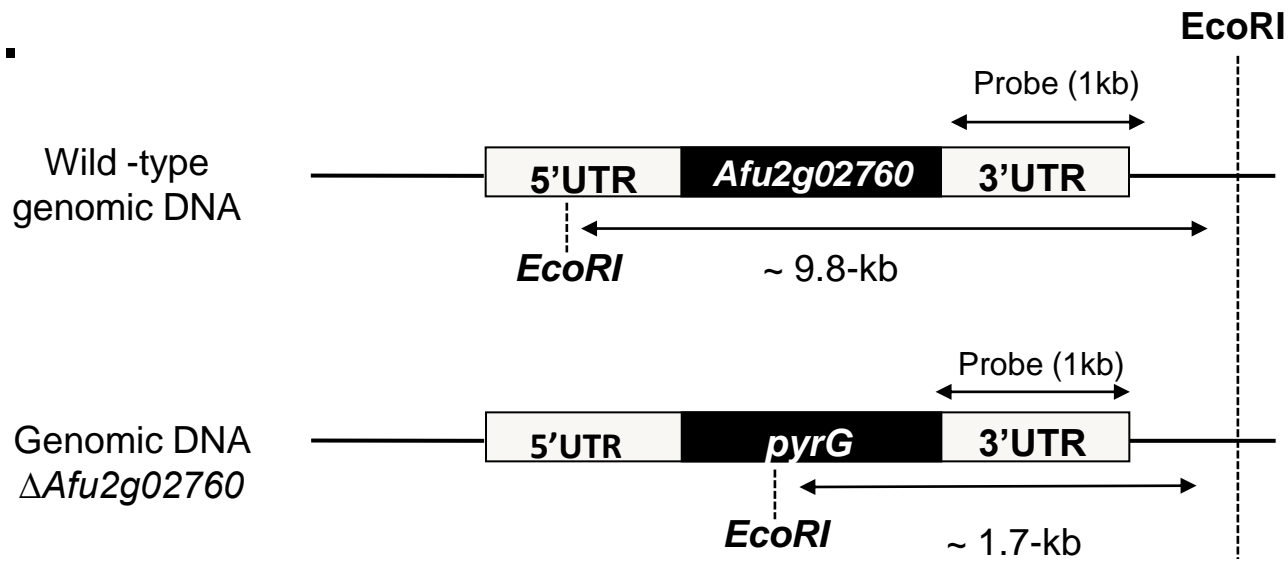

## Afu2g02760

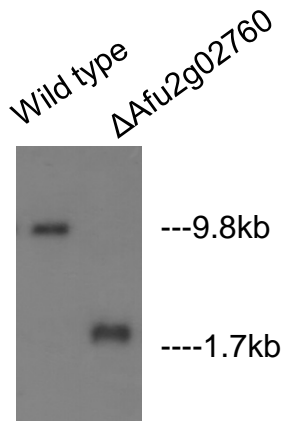

T.

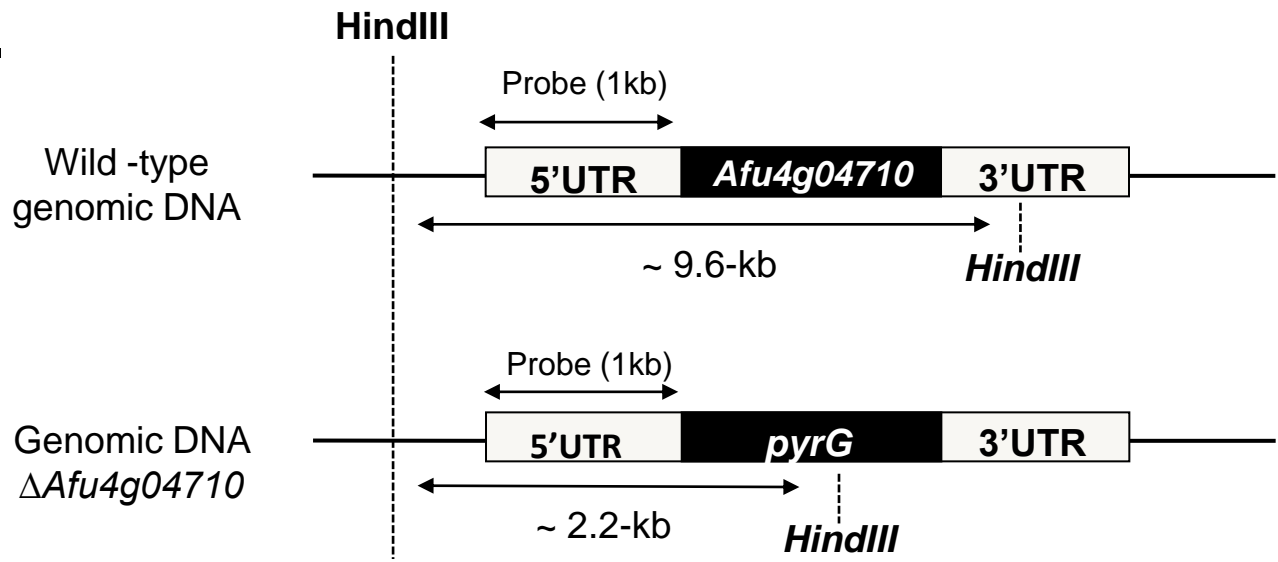

### Afu4g04710

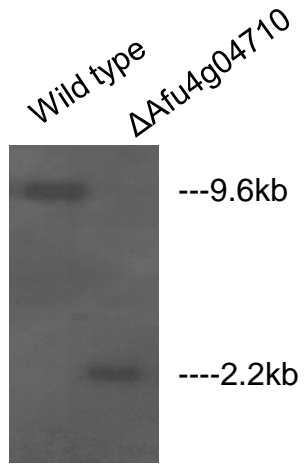

# U.

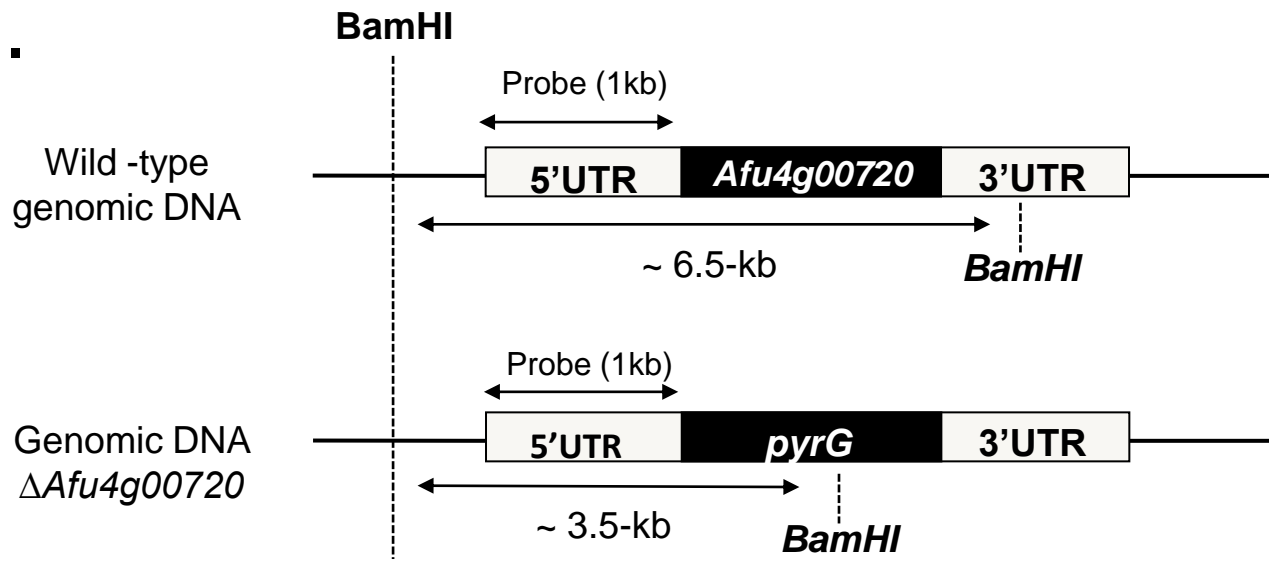

## Afu4g00720

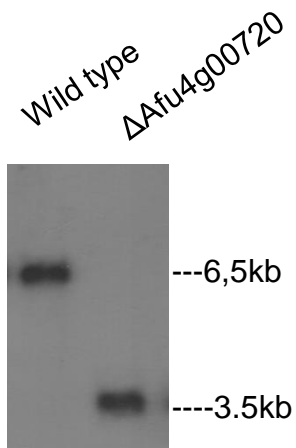

V.

**Sall**

Wild -type  
genomic DNA

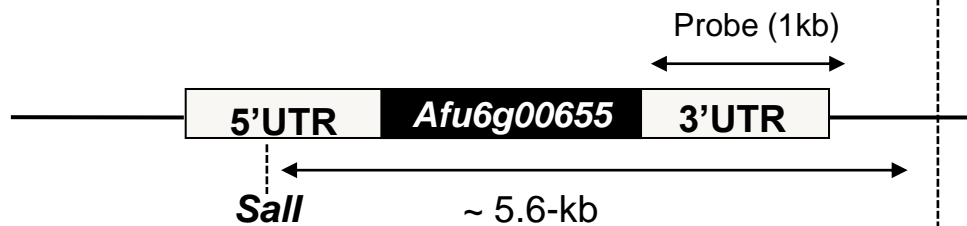

Genomic DNA  
 $\Delta$ *Afu6g06650*

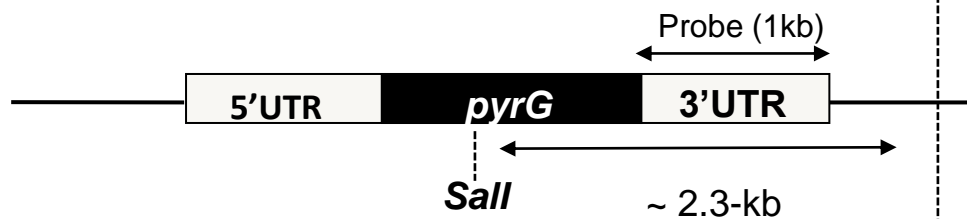

## Afu6g06650

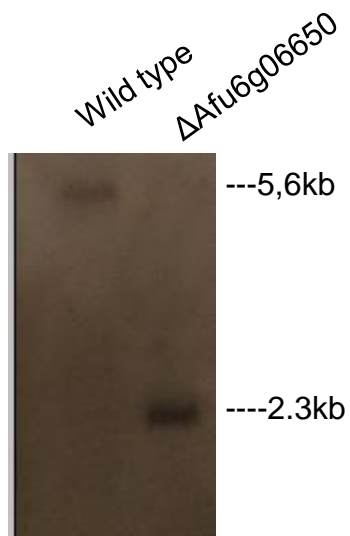

# X.

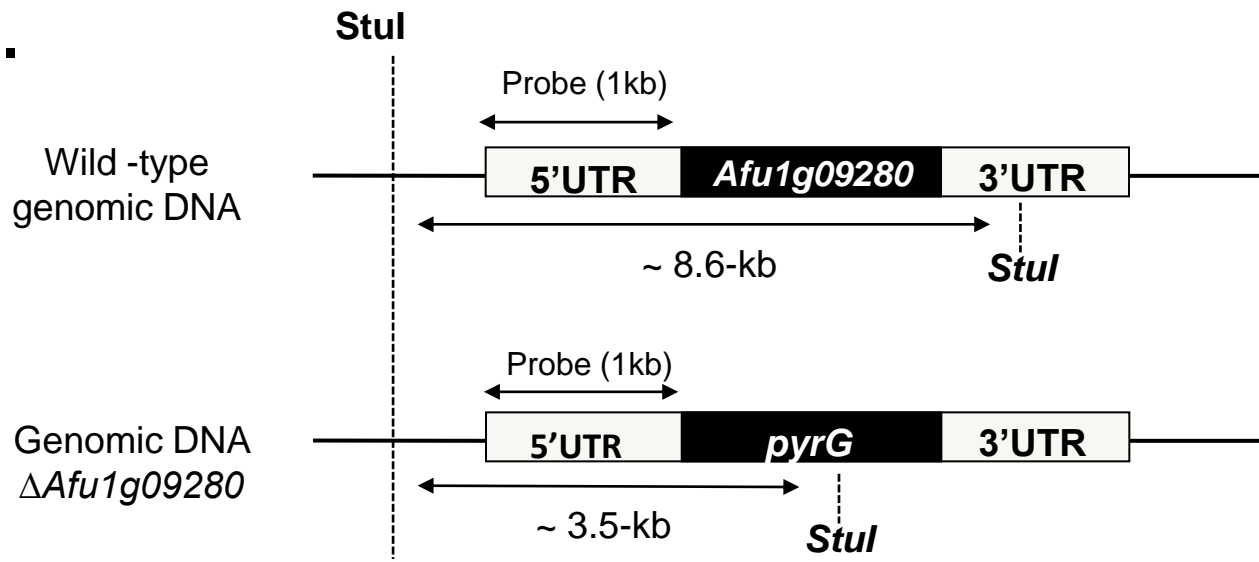

## Afu1g09280

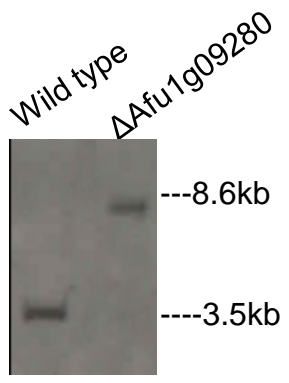

Y.

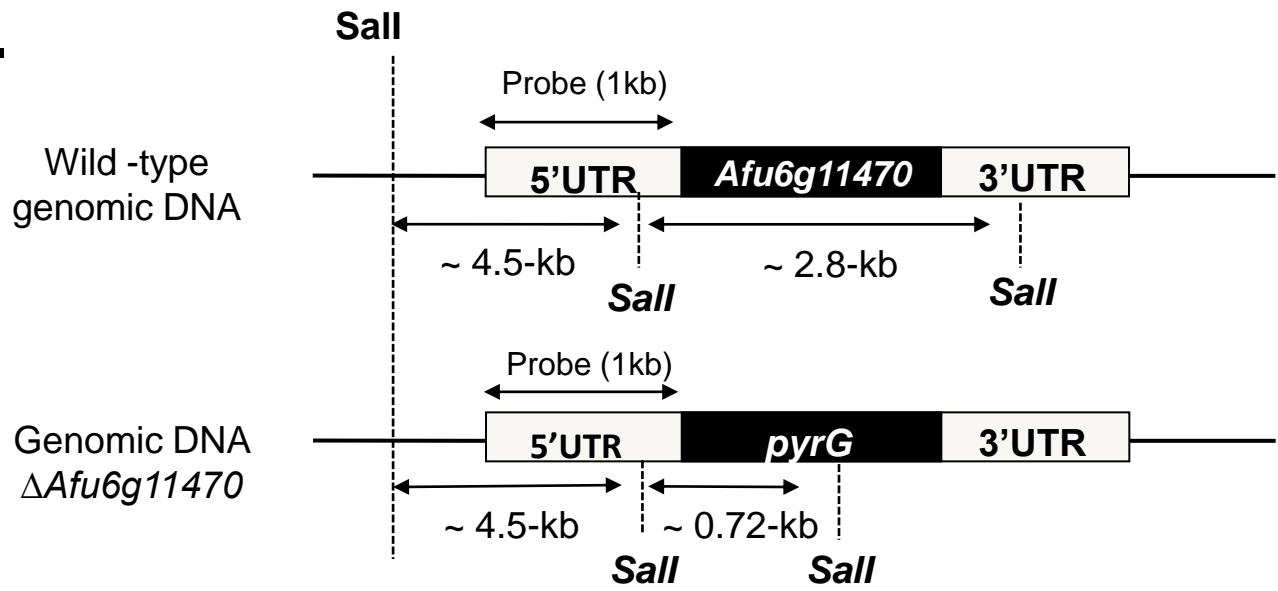

### Afu6g11470

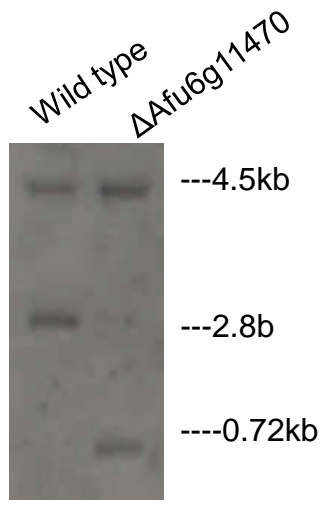



## Complementation of delta *Afu1g09280*

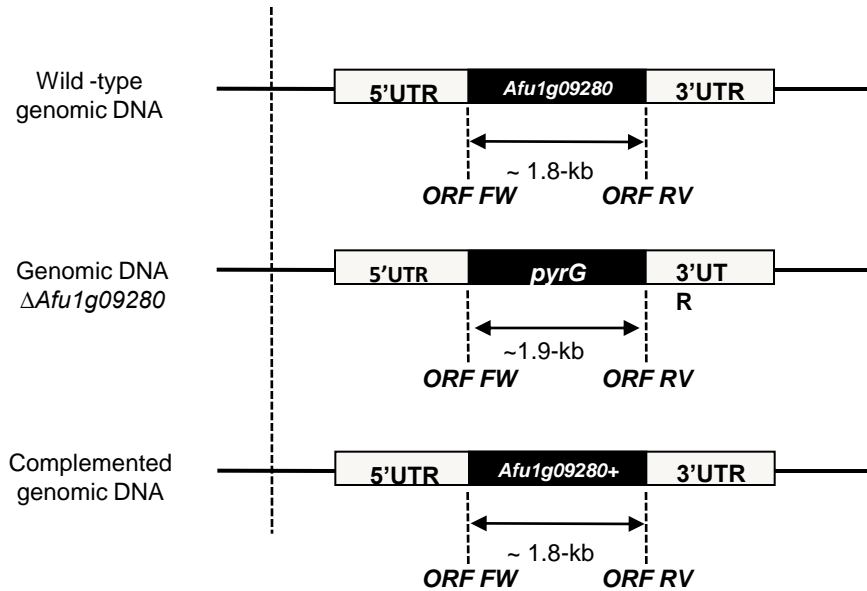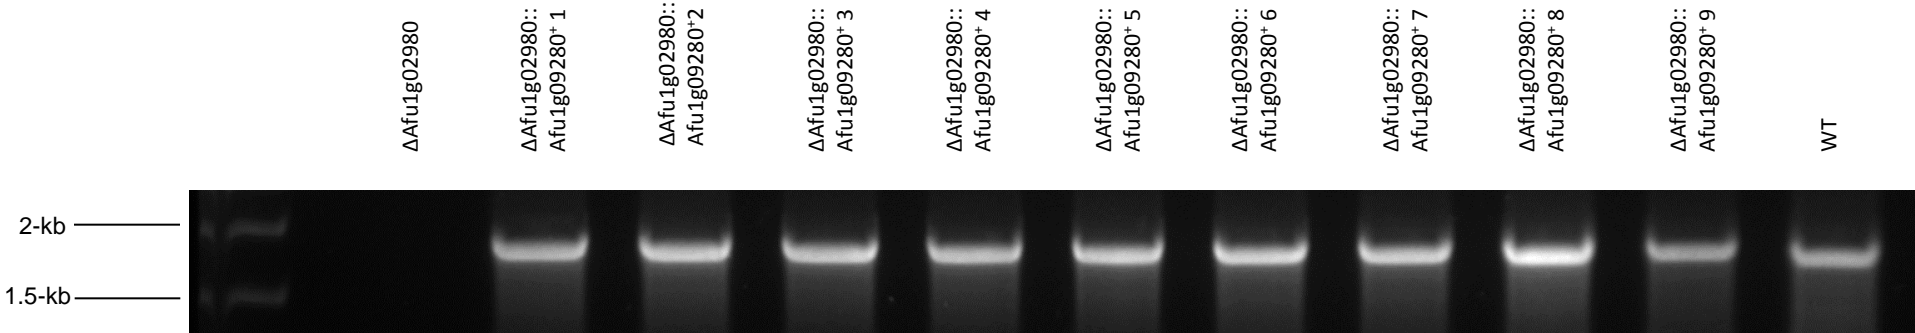

Z.

Wild -type  
genomic DNA

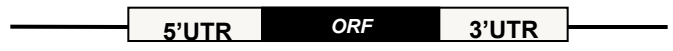

Addition of *niiA* promoter in  
genomic DNA

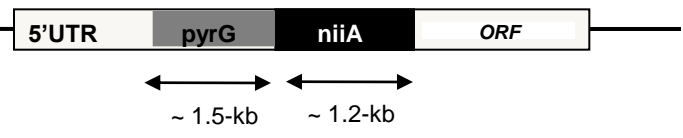

Figure S1 – Southern blot analysis for all the phosphatase deletion mutants (A to Y), Complementation analysis (W), and strategy to fuse *niiA* promoter to the essential genes (Z).

.
