# Supplementary material for: Systematic Global Analysis of Genes Encoding Protein Phosphatases inAspergillus fumigatus
Source: Oxford University Press journal article supplement (doi:10.1534/g3.115.016766), 2015-05-12
Supplement: 016766_figures2.pdf [file 016766_figures2.pdf]

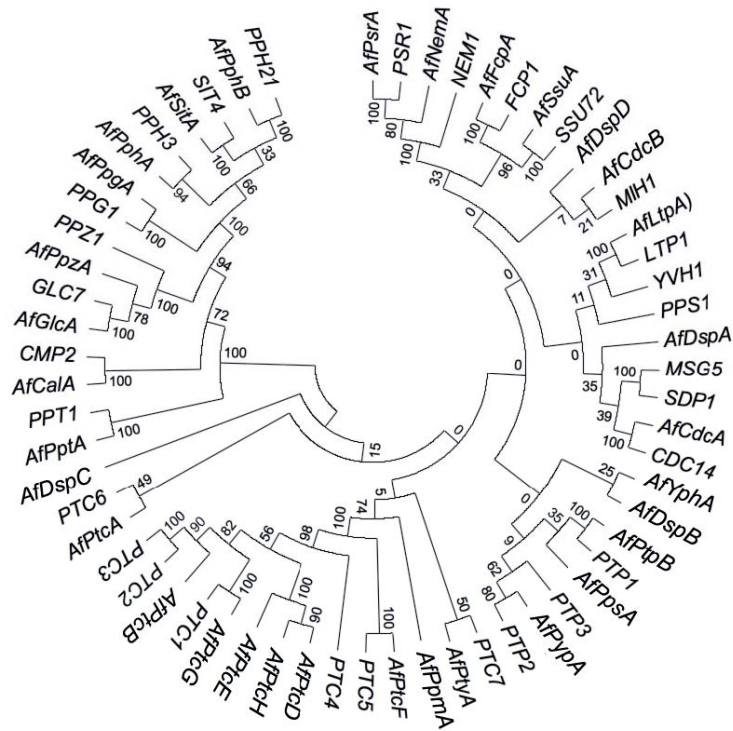

**Figure S2** Phylogeny of *A. fumigatus* and *S. cerevisiae* protein phosphatases. The optimal tree for the *A. fumigatus* and *S. cerevisiae* phosphatases is represented. The tree was inferred using the Neighbour-Joining Method. The bootstrap values calculated on 500 replicates are indicated on the tree branches. When homologues are available, *A. fumigatus* proteins were named according to the *S. cerevisiae* protein names (see <http://www.yeastgenome.org>) (see Table 1). Sequences were aligned with ClustalW and the tree was constructed by using MEGA6. Sequences are available in File S1.
