# Supplementary material for: Systematic Global Analysis of Genes Encoding Protein Phosphatases inAspergillus fumigatus
Source: Oxford University Press journal article supplement (doi:10.1534/g3.115.016766), 2015-05-12
Supplement: 016766_figures3.pdf [file 016766_figures3.pdf]

A. *A. fumigatus*  $\Delta$ Afu5g12010 (*pphA*)

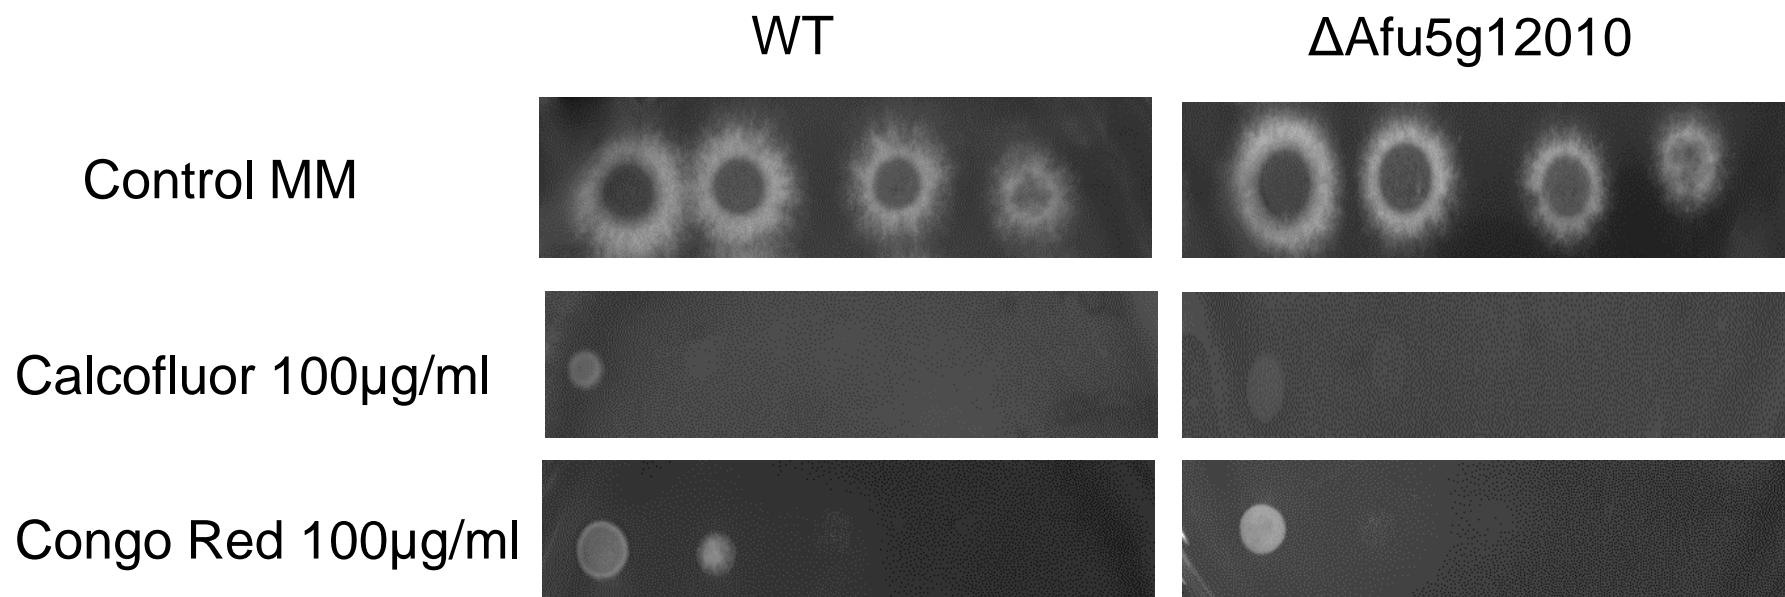

B. *A. fumigatus*  $\Delta$ Afu6g11470 (*sitA*)

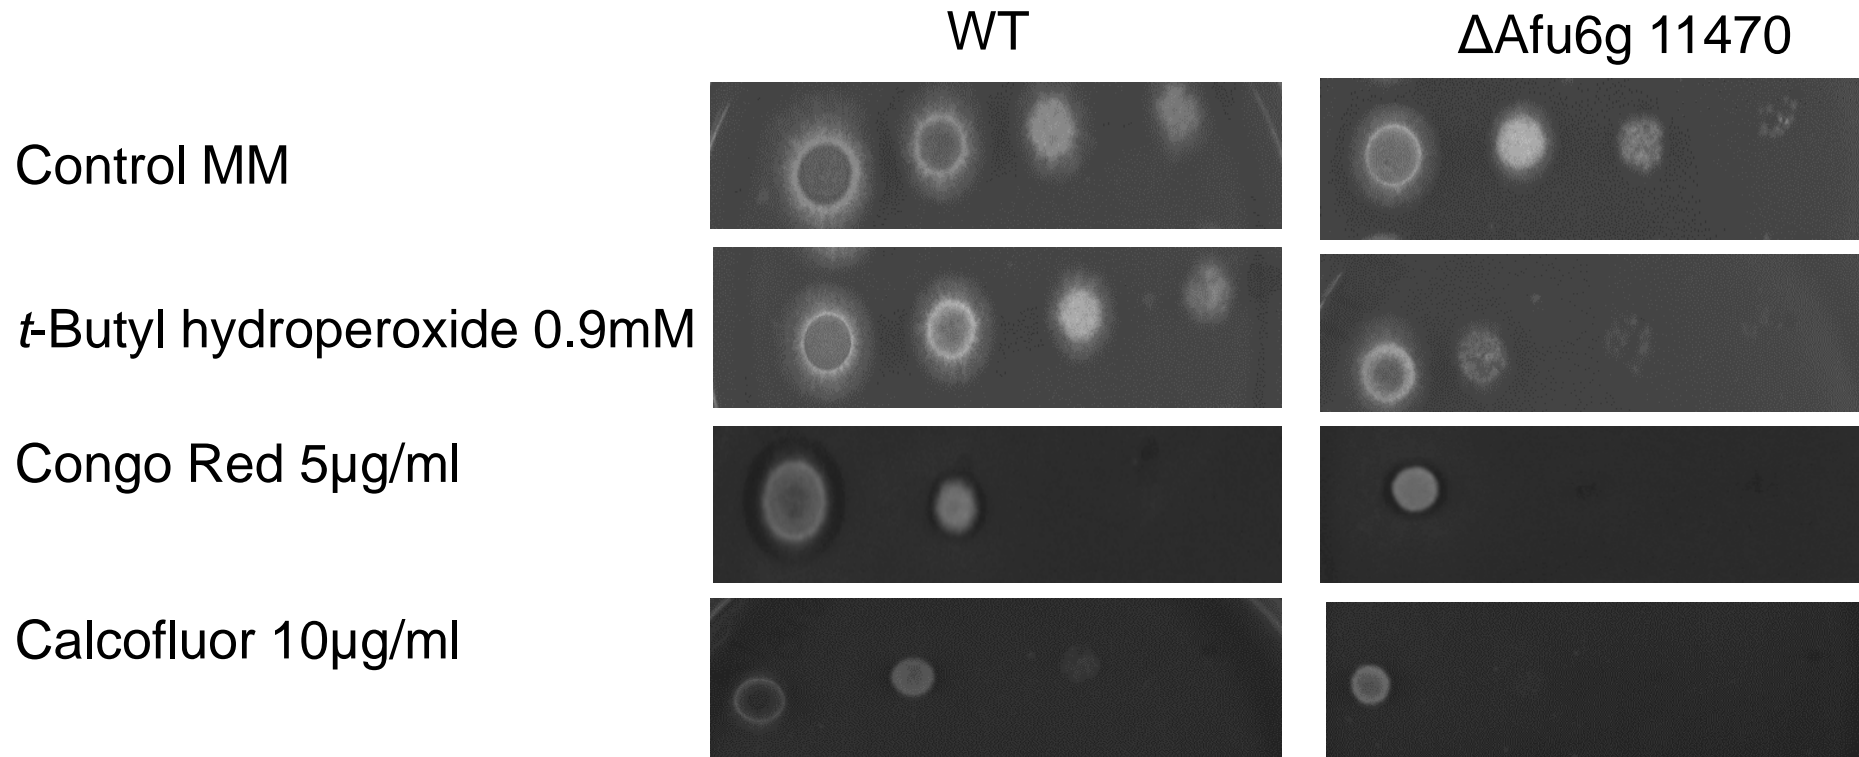

# C. *A. fumigatus* $\Delta$ Afu2g03950 (*ppzA*)

WT  $\Delta$ Afu2g03950

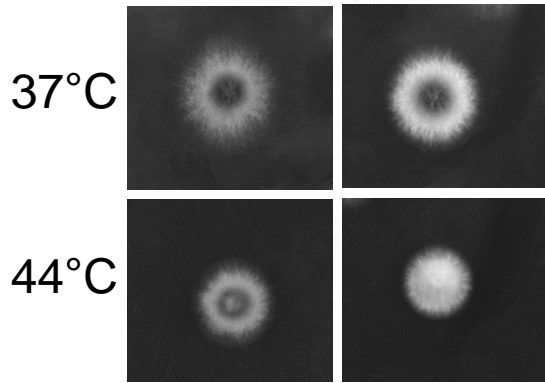

Control MM

Menadione 0.025mM

*t*-Butyl hydroperoxide 1mM

Wt

$\Delta$ Afu2g039

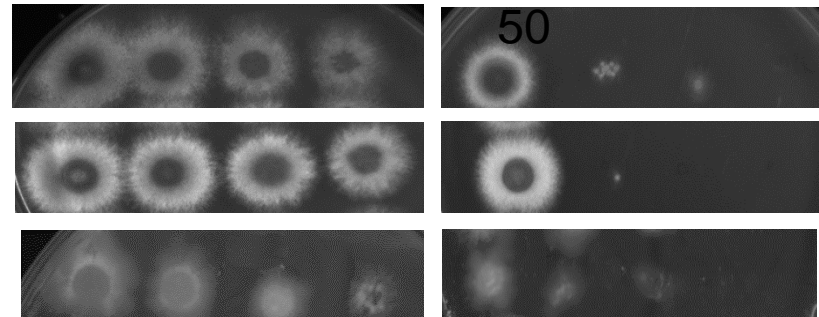

WT

$\Delta$ Afu2g03950

Control MM

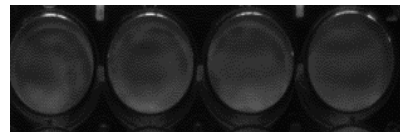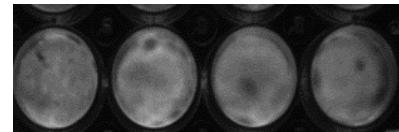

Paraquat 8mM

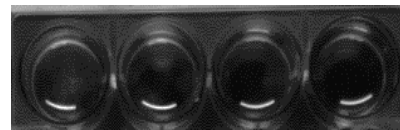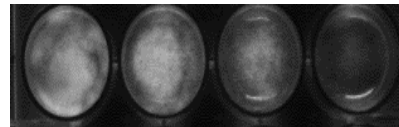

D. *A. fumigatus*  $\Delta$ Afu5g06700 (*pptA*)

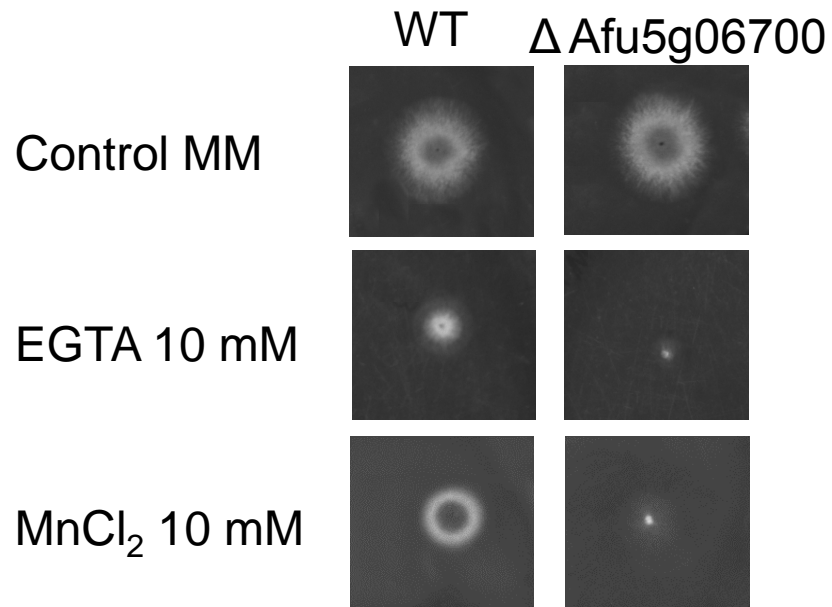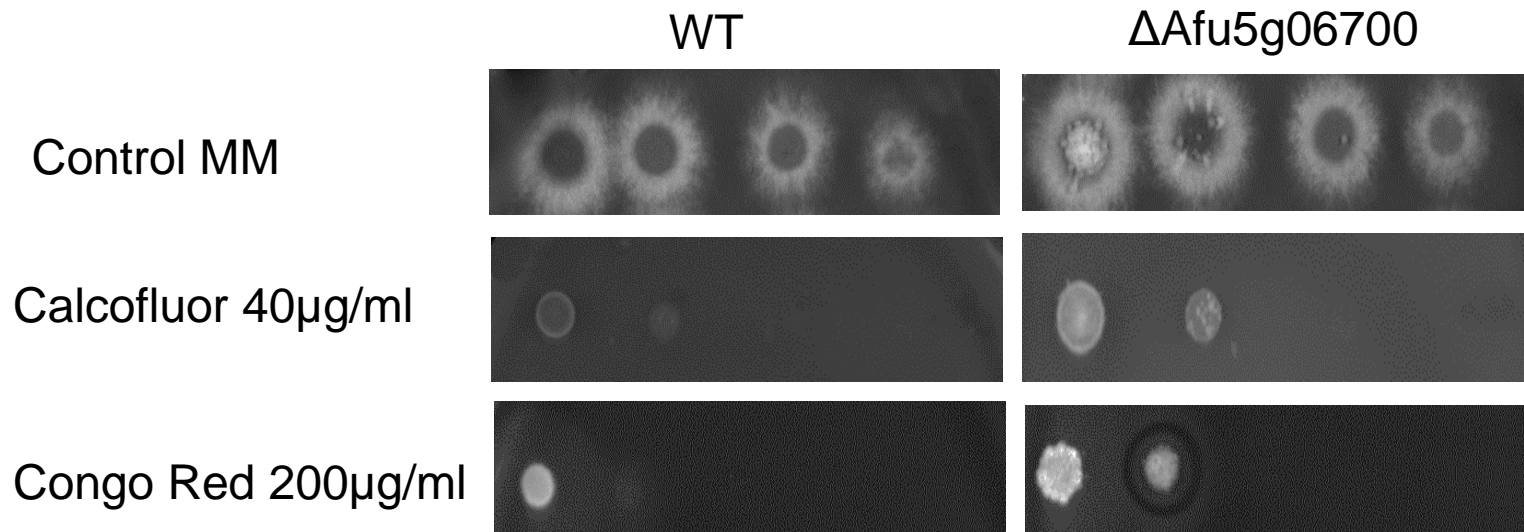

E. *A. fumigatus*  $\Delta$ Afu1g15800 (*ptcA*)

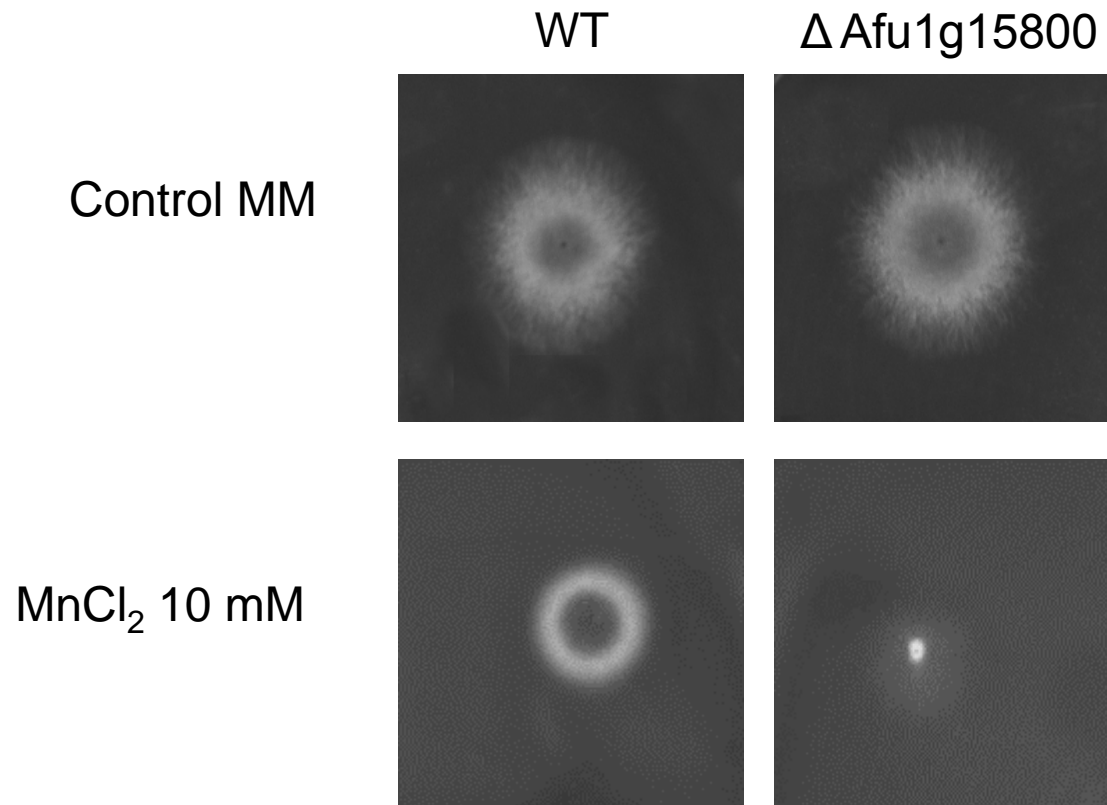

F. *A. fumigatus*  $\Delta$ Afu1g09280 (*ptcB*)

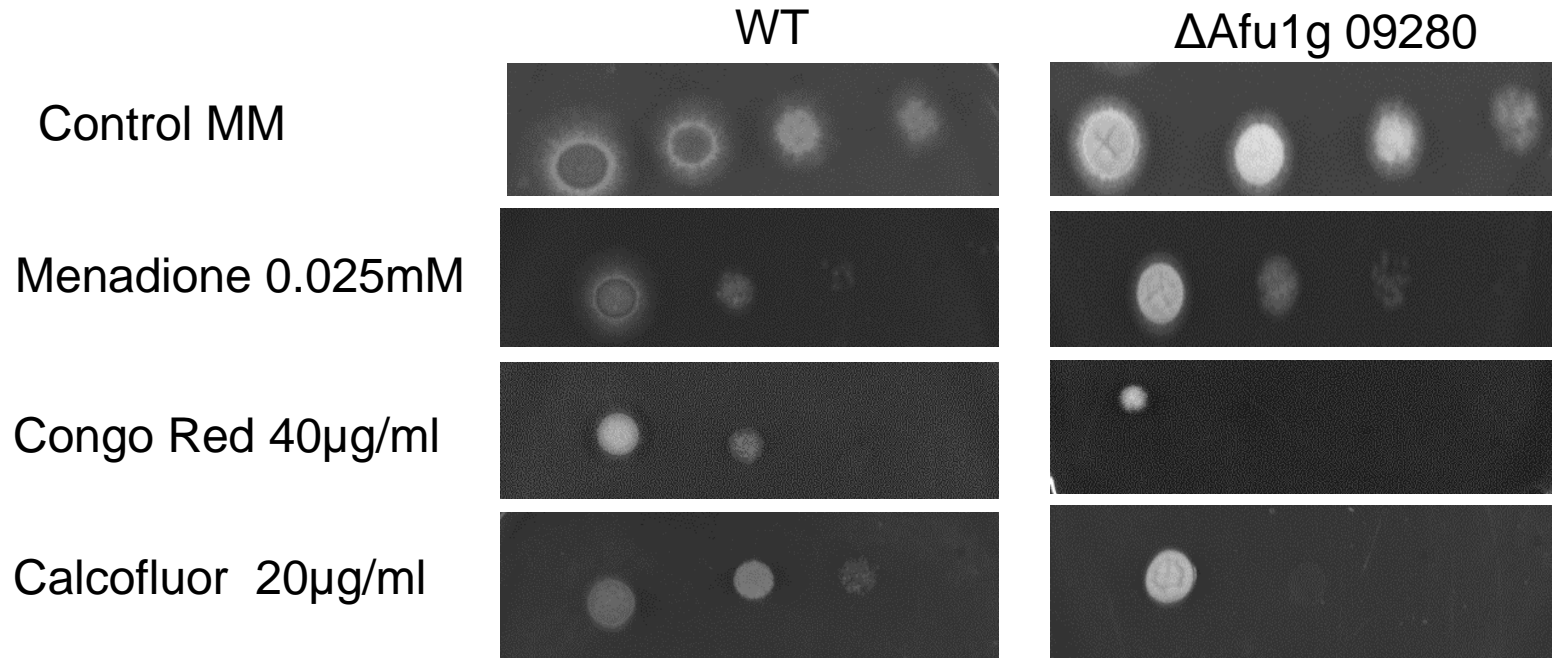

G. *A. fumigatus*  $\Delta$ Afu1g06860 (*ptcF*)

MM

WT

$\Delta$ Afu1g 06860

37°C

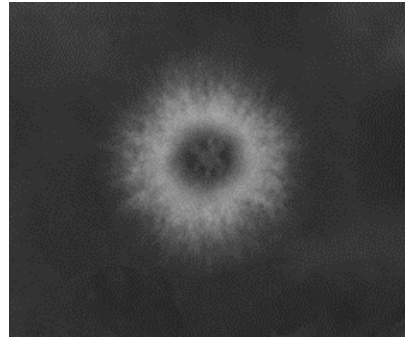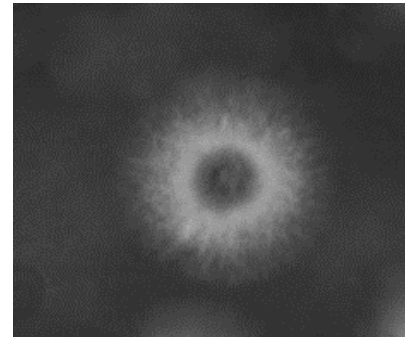

44°C

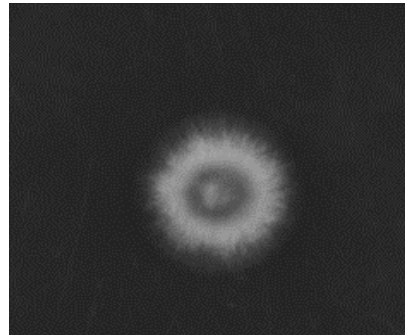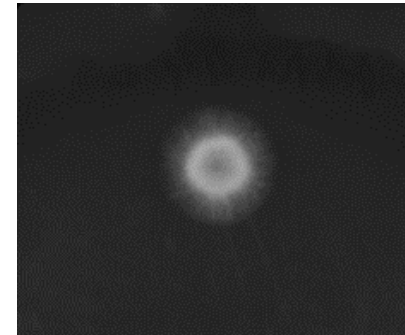

H. *A. fumigatus*  $\Delta$ Afu5g13340 (*ptcG*)

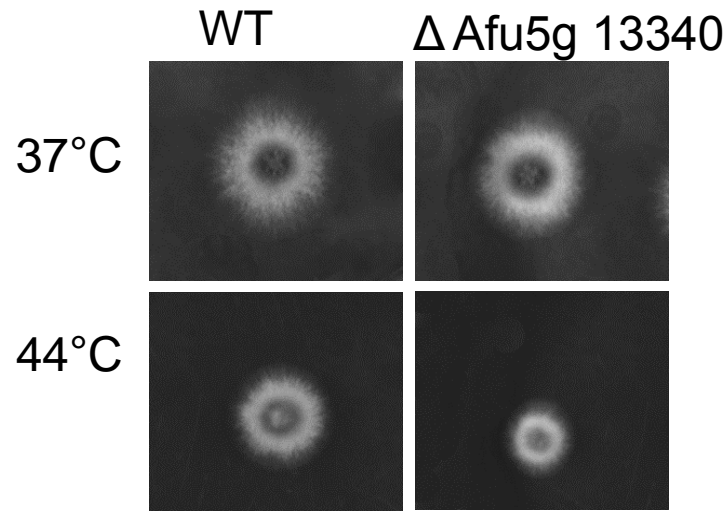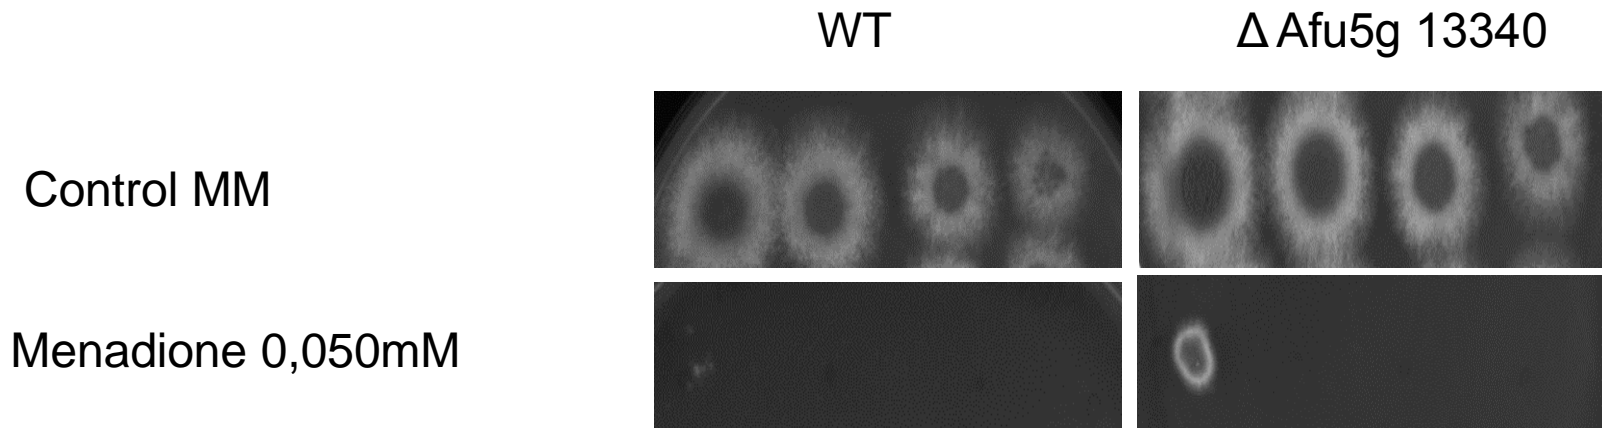



I. *A. fumigatus*  $\Delta$ Afu1g09460 (*nemA*)

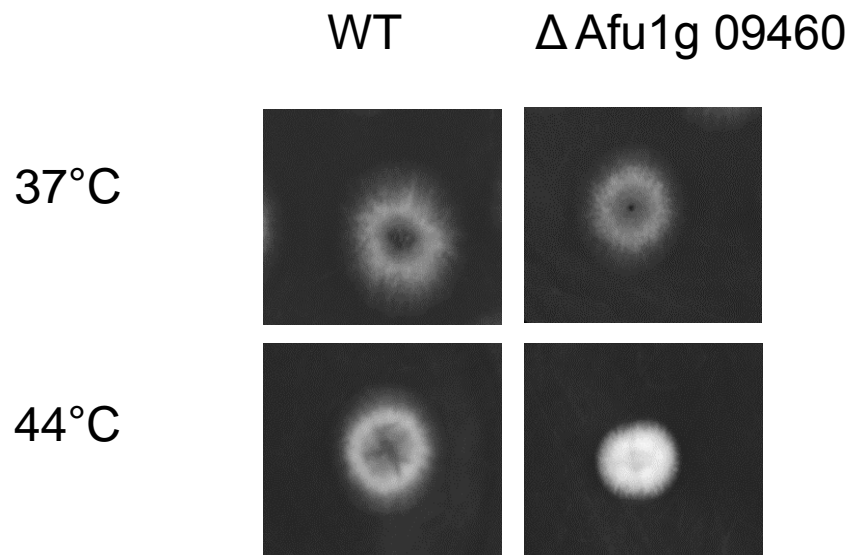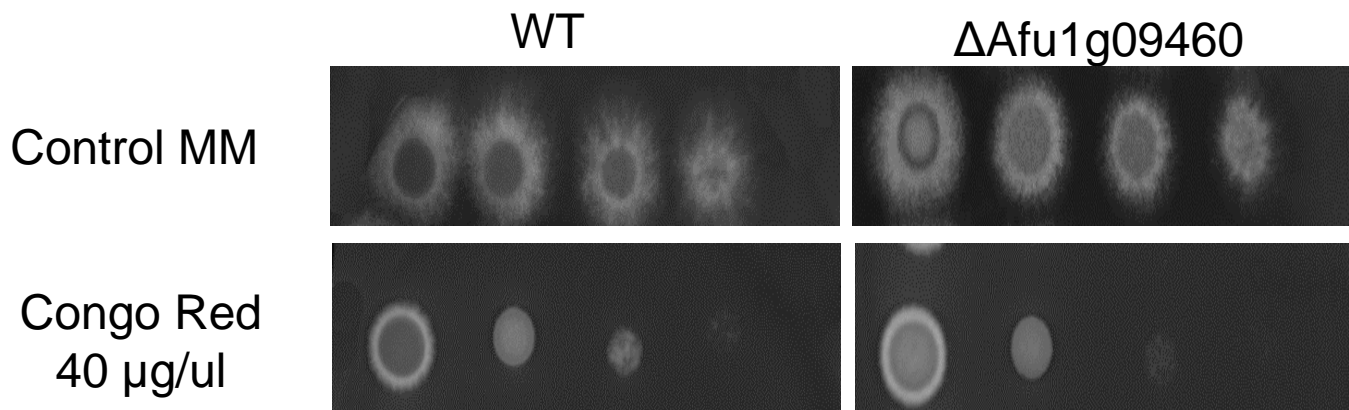

J. *A. fumigatus*  $\Delta$ Afu1g04790(*psrA*)

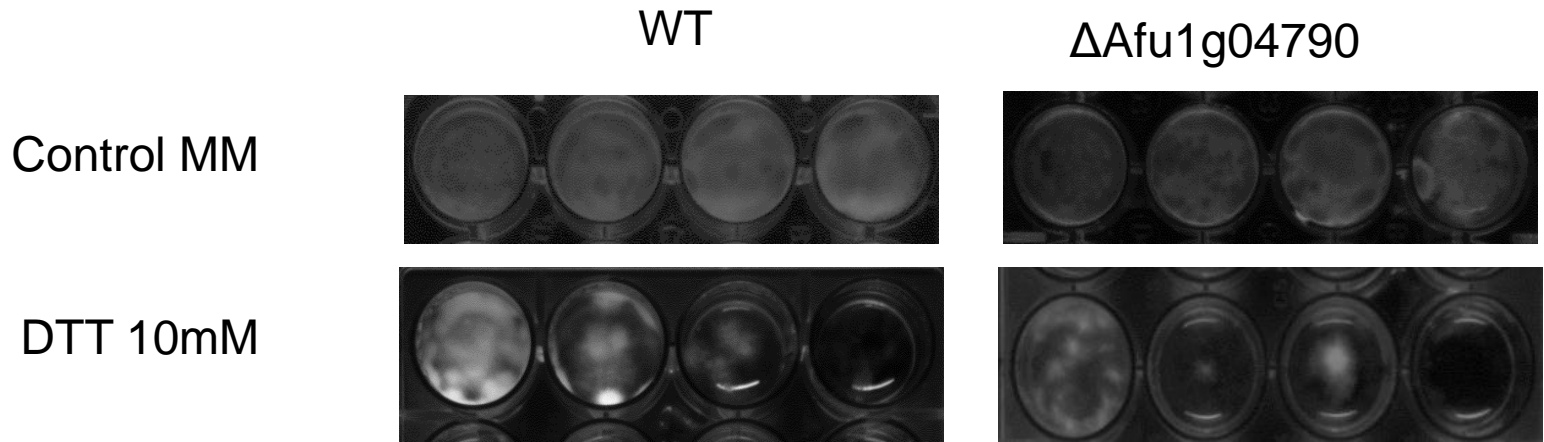

I. *A. fumigatus*  $\Delta$ Afu5g11690 (*ppsA*)

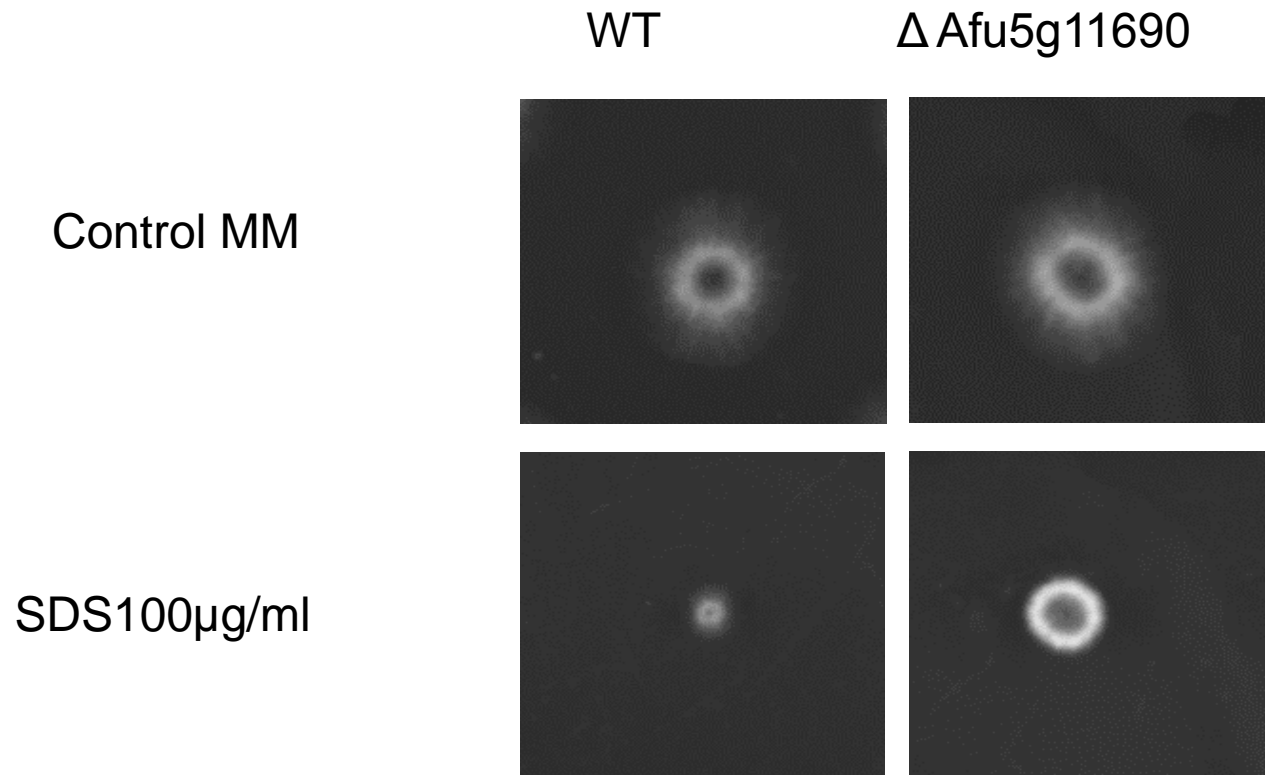

K. *A. fumigatus*  $\Delta$ Afu3g10970 (*ptpB*)

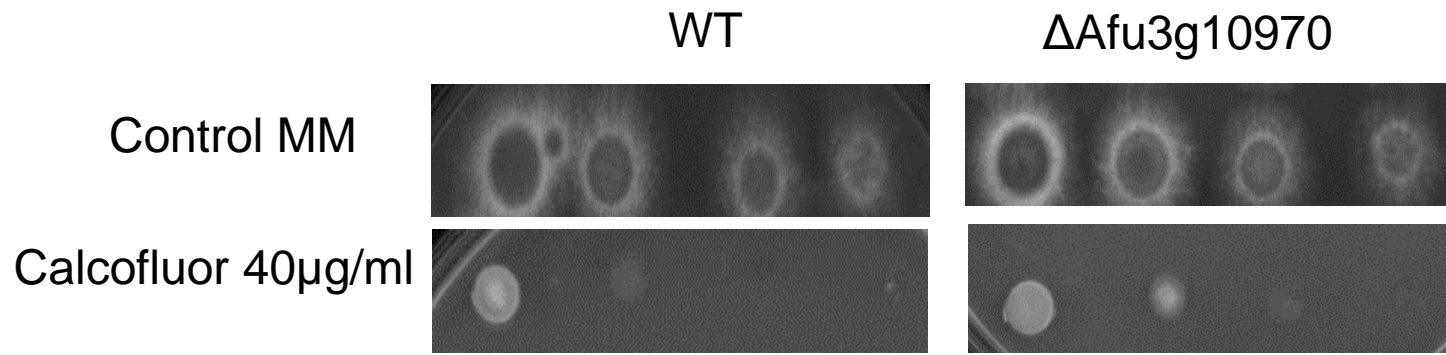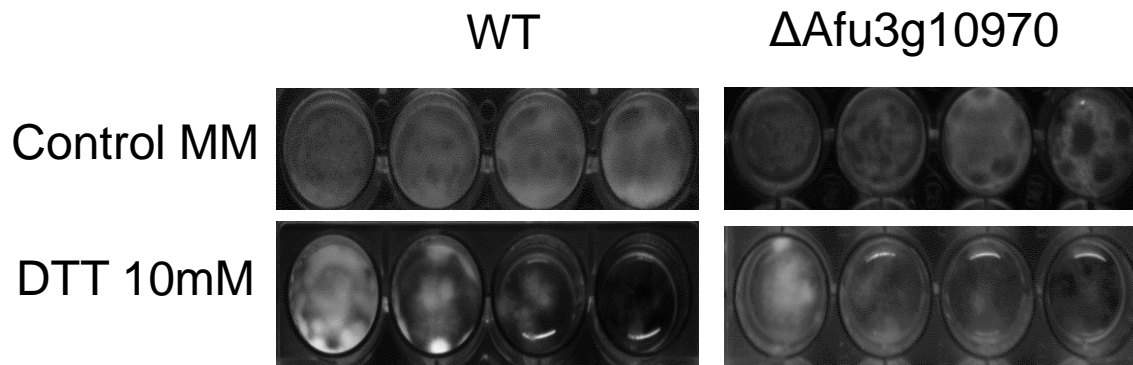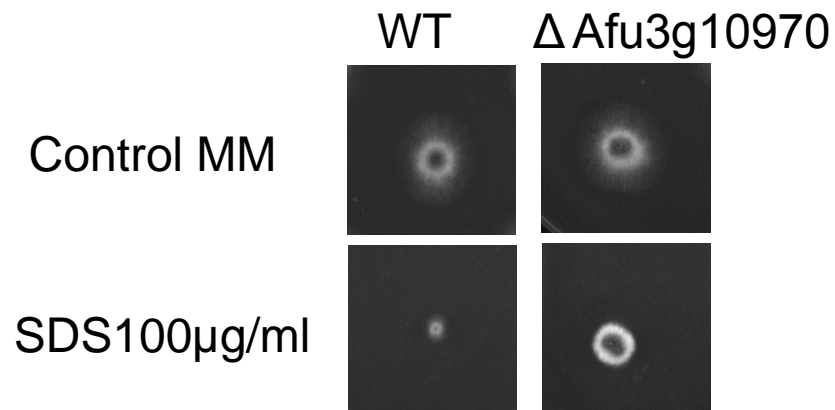

L.

# *A. fumigatus* $\Delta$ Afu2g01880 (*lptA*)

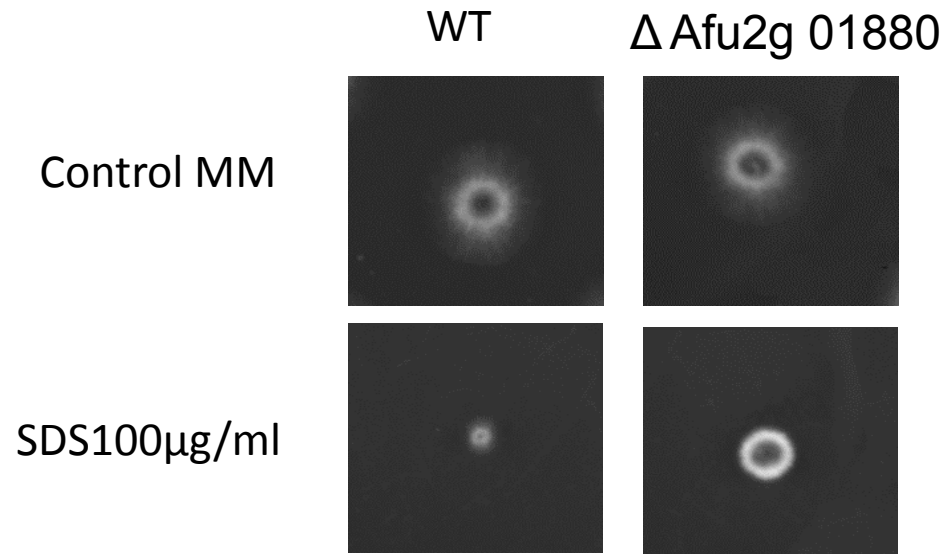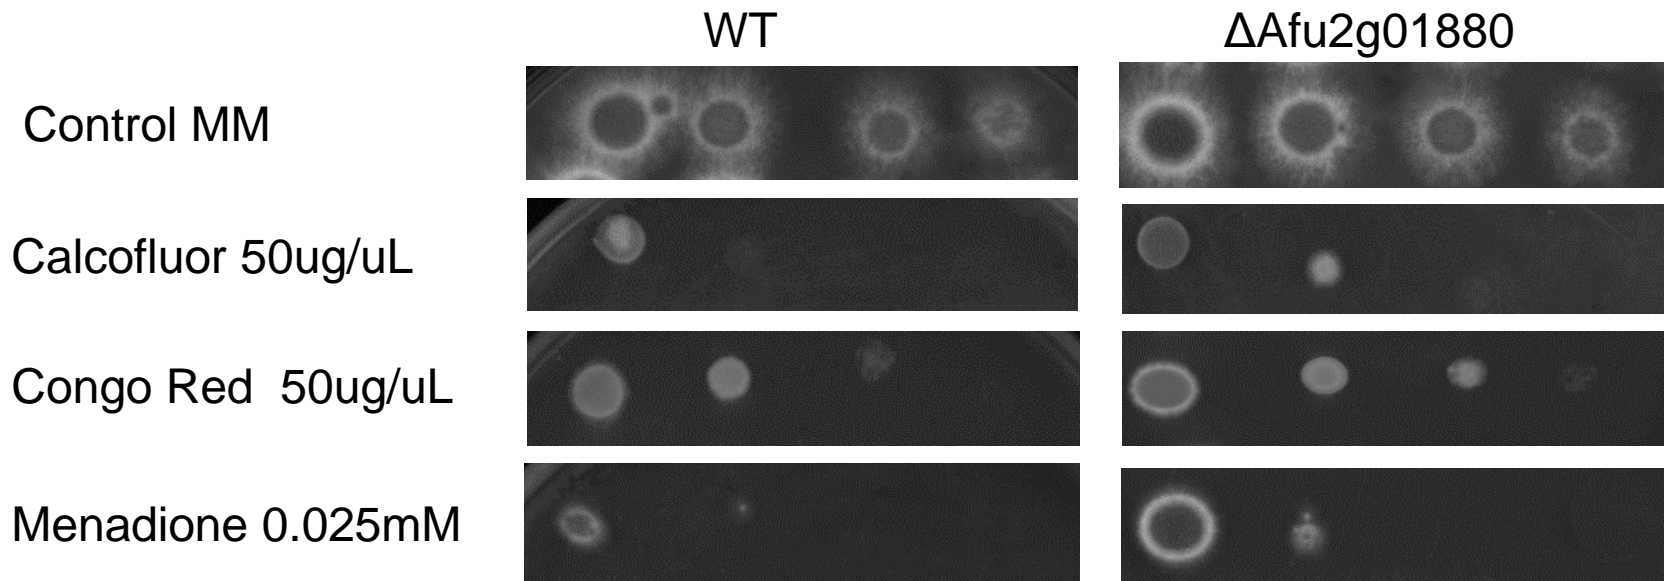

M. *A. fumigatus*  $\Delta$ Afu3g12250 (*cdcA*)

WT

$\Delta$ Afu3g12250

Control MM

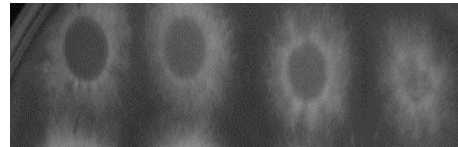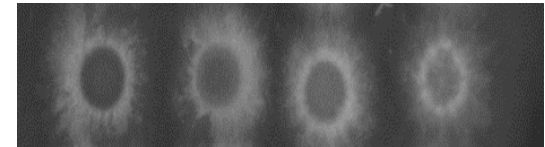

*t*-Butyl hydroperoxide 1mM

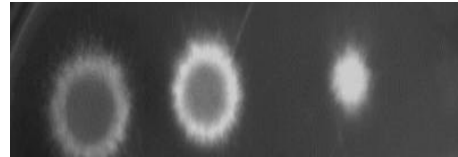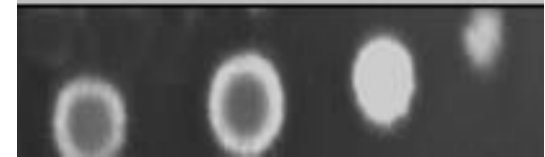

N. *A. fumigatus*  $\Delta$ Afu4g07000 (*yphA*)

WT

$\Delta$ Afu4g07000

Control MM

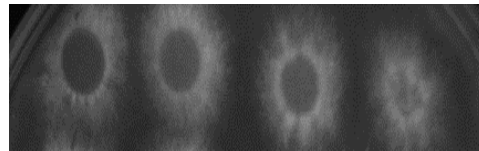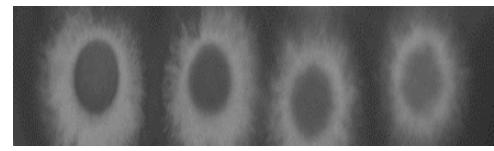

*t*-Butyl hydroperoxide 1mM

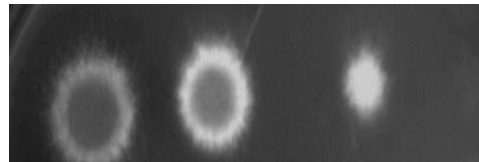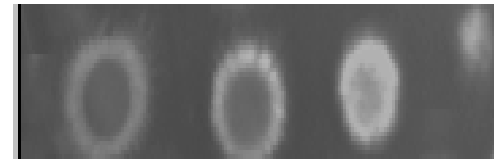

O. *A. fumigatus*  $\Delta$ Afu1g13040 (*dspA*)

WT

$\Delta$ Afu1g13040

Control MM

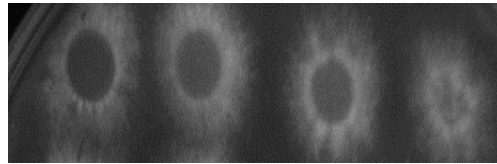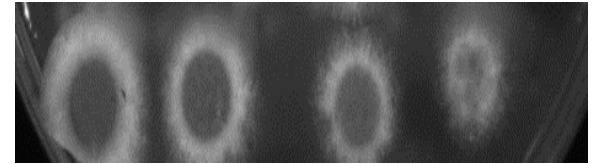

*t*-Butyl hydroperoxide 1mM

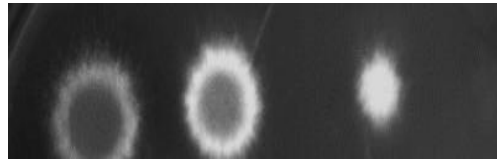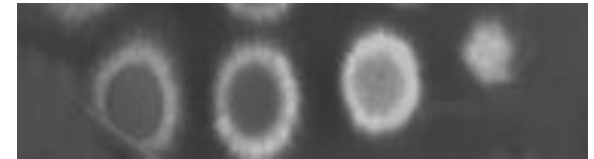



P. *A. fumigatus*  $\Delta$ Afu2g02760 (*dspD*)

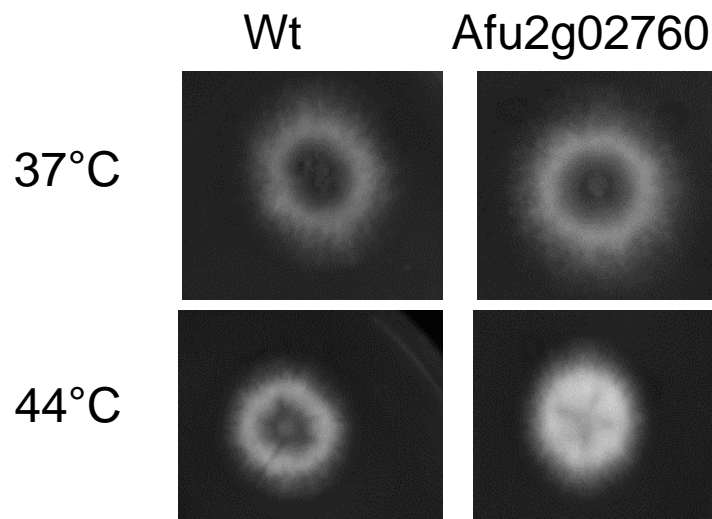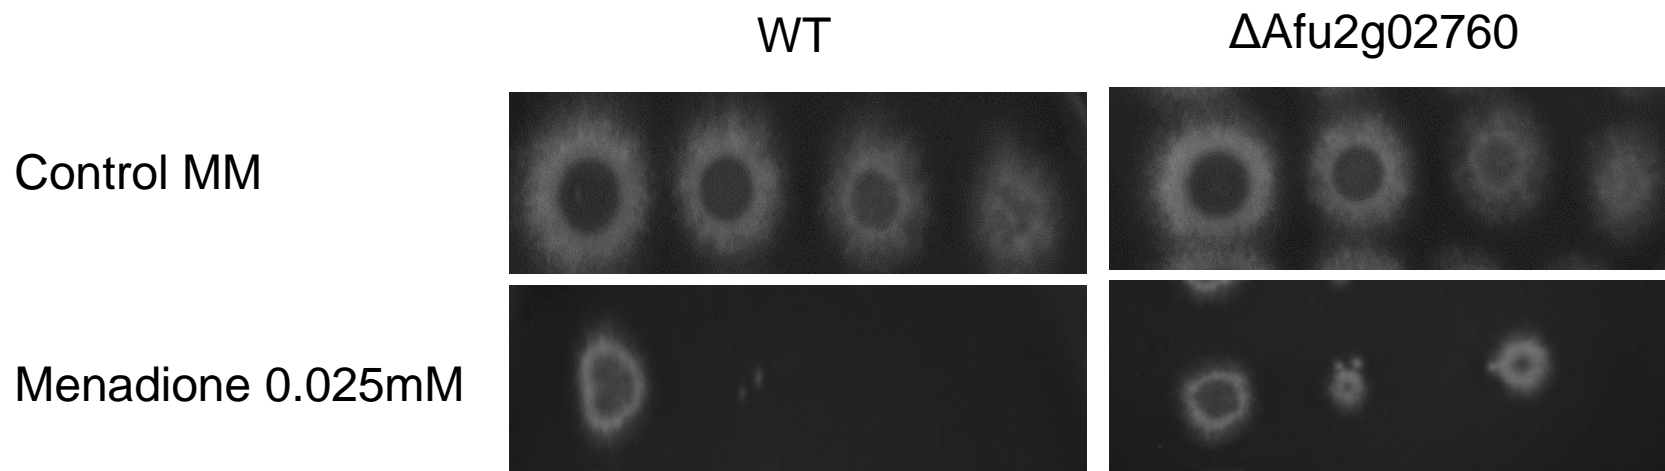

Figure S3 – Phenotypes for selected phosphatase deletion mutants (A to P). The order of the mutants follow the order of the mutants in Table 2.
