# Supplementary material for: Systematic Global Analysis of Genes Encoding Protein Phosphatases inAspergillus fumigatus
Source: Oxford University Press journal article supplement (doi:10.1534/g3.115.016766), 2015-05-12
Supplement: 016766_figures4.pdf [file 016766_figures4.pdf]

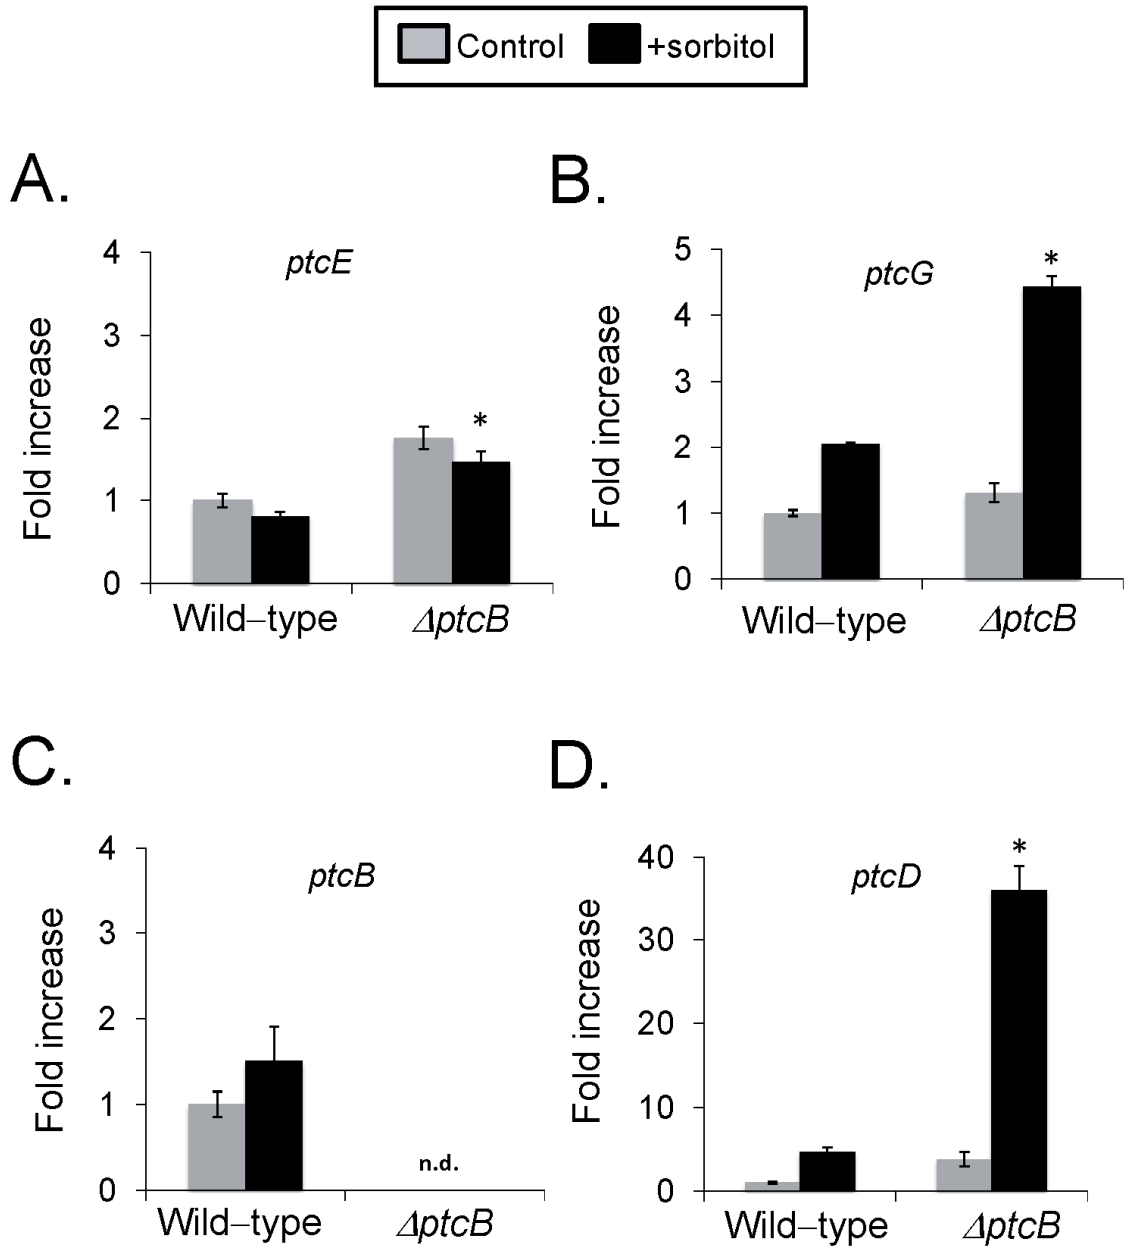

**Figure S4** Phosphatase encoding genes were induced by exposure to sorbitol or fluodioxonil in an SskA-dependent manner. The wild-type and the phosphatase null mutants were grown for 18 h at 37°C. Then, sorbitol (1 M final concentration) or fluodioxonil were added for 0 (control) and 10 minutes. The mycelium was harvested at the indicated times, and total RNA was extracted. The absolute quantitation of the selected genes (A to D) and *actA* (Afu6g04740, encoding the actin) was determined by a standard curve (i.e.,  $C_T$ -values plotted against a logarithm of the DNA copy number). The results are the means ( $\pm$  standard deviation) of four biological replicates (\*,  $p < 0.001$ , comparison of the treatments with the time zero control).
