# Supplementary material for: Systematic Global Analysis of Genes Encoding Protein Phosphatases inAspergillus fumigatus
Source: Oxford University Press journal article supplement (doi:10.1534/g3.115.016766), 2015-05-12
Supplement: 016766_figures5.pdf [file 016766_figures5.pdf]

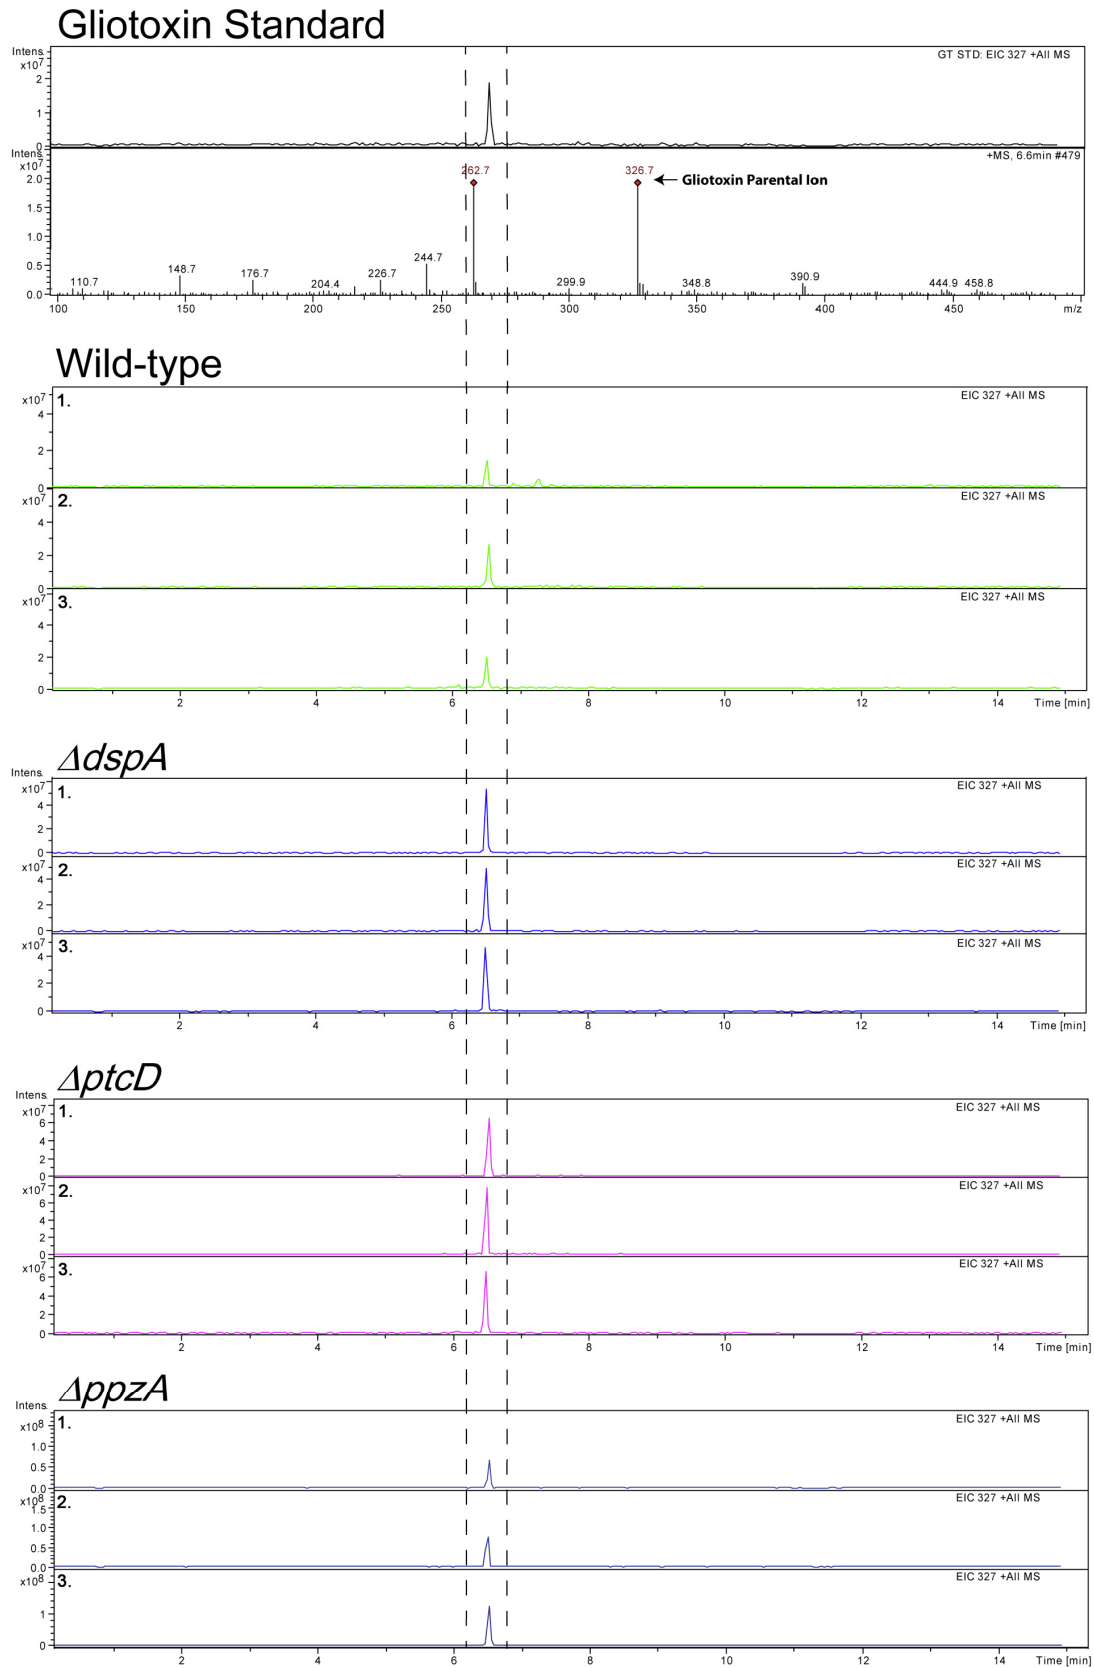

**Figure S5** Gliotoxin chromatograms for the wild-type and phosphatase mutants. Dotted lines show the gliotoxin standard graph.
