# Supplementary material for: Systematic Global Analysis of Genes Encoding Protein Phosphatases inAspergillus fumigatus
Source: Oxford University Press journal article supplement (doi:10.1534/g3.115.016766), 2015-05-12
Supplement: 016766_figures6.pdf [file 016766_figures6.pdf]

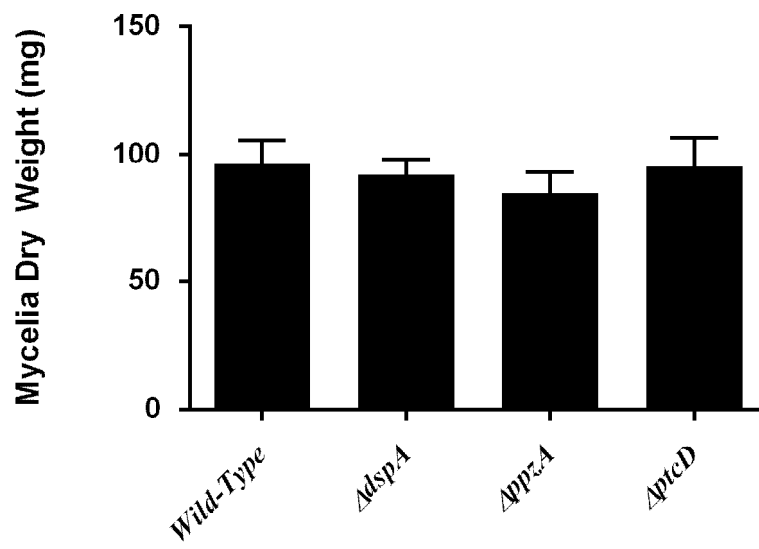

**Figure S6** Dry mycelial weight for the wild-type and the phosphatase mutants used for the gliotoxin analysis shown in Figure S5.
