# Supplementary material for: Systematic Global Analysis of Genes Encoding Protein Phosphatases inAspergillus fumigatus
Source: Oxford University Press journal article supplement (doi:10.1534/g3.115.016766), 2015-05-12
Supplement: 016766_files1.pdf [file 016766_files1.pdf]

## File S1

### Phosphatase sequences used for the phylogenetic analysis

>AfPphA

MSDLDRAlAQLRACRLIPESEVRELCYKAREILIEEGNVVSDAPVTICGDIHGQFHDLMElFRVGGDVPDTN  
YLFMGDFVDRGFYSLESFLLLLCLKVRYPDRI TLIRGNHESRQITTVYGFYDECIRKYGSANVWRYCCEVFDYL  
ALGALVLGASSELEPTGSTMNDTTQSTMPIDGAELETEVLNSRGEVTMSTYRRRQRSSSDASTDSRNLSPPR  
DISAVPGQAPARSGAPGTGASNGAGSNTSRTGAVLCVHGGLSPLIDTVDKIRLIDRKQEVPEHGAMCDLL  
WSDPDEIEGWGLSPRGAGFLFGGDIVKQFNyKNDLSLVARAHQLVMEGYKEMFDGGIVTVWSAPNYCYR  
CGNVAAILELGEDTSNGGTVARSNyGRSNyVSGVDSGGSRVSPGRRYRVFEAAAQDTRGMPAKKPV  
ADYFL

>PPH3

MMDLDKIIASLRDGKHIPEETVFRlCLNSQELLMNEGNVTQVDTPVTICGDIHGQLHDLLTFEKSGGVEKT  
RYIFLGDVDRGFYSLESFLLLLCYKLRYPDRI TLIRGNHETRQITKVYGFYDEVVRKYGNSNVWRYCCEVFDYL  
SLGAIINNSIFCVHGGLSPDMTTVDEIR TIDRKQEVPEHGAMCDLLWSDPEDVDTWLSLPRGAGFLFGKREV  
DQFLEKNNVELIARAHQLVMEGYKEMFDGGLVTVWSAPNYCYRCGNVA AVLKIDDDL NREY TIFEAVQAQ  
NEVGNAIIPTKKSQMDYFL

>PPG1

MELDECLERLYKAQLLPEVTVRALCFKLEMLVKESNVIHIQTPVTVVGD MHGQFHDMLEIFQIGGPVPDT  
NYLFLGDYVDRGLYSVETIMLLIVLKLRYPSRIHLLRGNHESRQITQSYGFYTECLNKYGGNSRVWQYLTDIFD  
YLVLCIIIDDEIFCVHGGLSPNVQTIDQIKIIDRFREIPHDGAMADLVWSDPEENNNPTLDHPD NSGQHFQV  
SPRGAGYTFGRSVVEKFLRMNDMNRIYRAHQLCNEGYQIYFDGLVTTVWSAPNYCYRCGNKASILELYSKD  
QFYFNVFEEAPENKLLKENS MNDALEDSISNPVANRKL IADYFEDDSASADGSTDPEMYIFSDVYQARSAS  
NRHVDYFL

>AfGlcA

MADQEVLDLNIIDRLLEVRGSRPGKQVQLLEA IRYLCTKAREIFISQPILLELEAPIKICGDIHGQYYDLLRLFY  
GGFPPEANYLFLGDYVDRGKQSLETICLLAYKIKYPENFFVLRGNHECASINRIYGFYDECKRRYNIKLWKTFT  
DCFNCLPIAAIIDEKIFTMHGGLSPDLNSMEQIRRV MRPTDIPDCGLLCDLLWSDPKDITG WSENRGVSF  
TFGPDVVSRLQKHDMDLICRAHQVVEDGYEFFSKRQLVTLFSAPNYCGEFDNAGAMMSVDESLLCSFQIL  
KPAEKKQKYVYGGMSSGAPTPPRKPKKK

>GLC7

MDSQPVDVDNIIDRLLEVRGSKPGQVQV DLEENEIRYLCSKARSIFIKQPILLELEAPIKICGDIHGQYYDLLRLFY  
YGGFPPESNYLFLGDYVDRGKQSLETICLLAYKIKYPENFFILRGNHECASINRIYGFYDECKRRYNIKLWKTFT  
DCFNCLPIAAIIDEKIFCMHGGLSPDLNSMEQIRRV MRPTDIPDVGLLCDLLWSDPKDIVG WSENRGVSF  
TFGPDVVNRFLQKQDMELICRAHQVVEDGYEFFSKRQLVTLFSAPNYCGEFDNAGAMMSVDESLLCSFQIL  
KPAQKSLPRQAGGRKKK

>AfSitA

MVDNKIPEPGPAKLKRNAGPDEWLEAAKDCKYLSEQHMKQLCEIVKEYMMEESNIQPVSTPVTICGDIHG  
QFYDLLELFRVSGGMPDGSEAEAPKTQSAVITSDDIEPPSTISDPKLRKKLRNTFAPEDGSEDSSASQRDRSS  
SGSRDVELKRNRFVFLGDYVDRGYFSLETTLTLLCLKAKYPDRVTLVRGNHESRQITQVYGFYEFCFQKYGNAS  
VWKACCQVDFMTLGAIIDGRVLCVHGGLSPEIRTLDQVRVVARAQEIPHEGAFCDLVWSDPDDVETWAV  
SPRGAGWLFGDKVADEFCHVNDLTLIARAHQLVNEGYKYHFANQNVVTVWSAPNYCYRCGNLASVCEIG  
DDLKPTFKLFSAVSDDQRHVPVSRPGRSEYFL

>SIT4

MVSRGPDEWLETIKKQALTENEMKQLCEMVKELLMEESNIQPVQTPVTVCGDIHGQFHDLLELFRTAGG  
FPDDINYIFLGDYVDRGYYSLETFTLLMCLKVYPAKITLVRGNHESRQITQVYGFYEECLNKYGSTTVWKYCC  
QVFDFTLAAIIDGKILCVHGGLSPEIRMLDQIRVLSRAQEVPHGEGFSDLLWSDPDNVEAWQVSPRGAGW  
LFGSKVAREFNHVNGLNLIARAHQLVMGEGFKYHFPEKDVVTVWSAPNYCYRCGNVASVMKVDEDEDLEPTFK  
IFSAVPDDYIRESTANHNNQRAGYFL

>AfPpzA

MGQSHSKGNSGPGDSLQSYPSFSRSDTKESLRSRSGSIRSKIRSSDSPRGSTAGLSDDKSDAASVKSTTSRRSS  
TNQSVQSPDDTPSQPDAPEPPSPSLSSSLKRGHKVDNAMQQSGEVDHVSDVPPTGAAPTGPSTQKVGES  
ILIKRENQLNPILDFIMNAPLETSGSPGMGMGALKSIDLDDMISRLLDAGYSTKVTKTVCLKNAEIMAICSA  
RELFLSQPALLELSAPVKIVGDVHGQYTDLIRLFEMCGFPPASNYLFLGDYVDRGKQSLETILLLLCYKLKYPEN  
FFLLRGNHECANVTRVYGFYDECKRRCNIKIWKTFIDTFNCLPIAATVAGKIFCVHGGLSPLSHMDDIRGIAR  
PTDVPDYGLLNDLLWSDPADMEEDWEPNERGVSYCFGKKVIMNFLQRHDFDLVCRAHMVVEDGYEFYQ  
DRILVTVFSAPNYCGEFDNWGAIMSVSGELLCSFELLKPLDSTALKNHKGRKERNMMLSSPVPPLLRV  
AKEDHNLVQHRRDACGLFLAYPSLVTSWGISR

>PPZ1

MGNSSSKSSKKDSHSNSSSRNRPQVSRTESSHVKSASKNKSSRSRSLPSSSTTNTNSNVPDPSTPSKPNL  
EVNHQRHSSHTNRYHFPSSSHSHNSQNELLTTPSSSSTKRPSTSRSSYNKAAADLPPSMIQMEPKSPILK  
TNNSTHVSKHKSSYSSTYYENALTDNDDNDKNDISHTKRFSRSSNSRPSSIRSGSVSRKSDVTHEEPNNG  
SYSSNNQENYLVQALTRSNSHASSLSRKSFGSDGNTAYSTPLNSPGLSKLTDHSGEYFTSNSTSSLNHSS  
RDIYPSKHISNDDDIENSSQLSNIHASMENVNDKNNITDSKDPNEEFNDIMQSSGNKNAPKKFKPIDID  
ETIQKLLDAGYAAKRTKNVCLKNNEILQICIKAREIFLSQPSLLELSPVKIVGDVHGQYGDLLRFLTKCGFPPSS  
NYLFLGDYVDRGKQSLETILLFCYKIKYPENFFLLRGNHECANVTRVYGFYDECKRRCNIKIWKTFIDTFNTP  
LAAIVAGKIFCVHGGLSPVLNSMDEIRHVVRPTDVPDFGLINDLLWSDPTDSPNEWEDNERGVSYCYNKVAI  
NKFLNKFGFDLVCRAHMVVEDGYEFFNDRSLVTVFSAPNYCGEFDNWGAVMSVSEGLLCSFELLPLDSAA  
LKQVMKKGRQERKLANQQQMMETSITNDNESQQ

>AfPphB

MENNMEIDPARSPEPHHLSPTTDPGSIPTLDGWIEINLMACKQLAEDDVRRLCDRAREVLQEESNVQPVKC  
PVTVCGDIHGQFHDLMELFRIGGNPDTNYLFMGDYVDRGYYSVETVLLVCLKIRYPQRITILRGNHESRQI  
TQVYGFYDECLRKYGNANVWKYFTDLFDYLPLTALIENQIFCLHGGLSPSIDTLDNIRSLDRIQEVPHGPMC  
DLLWSDPDDRCGWGISPRGAGYTFGQDISEAFNHNNGLTLVARAHQLVMEGYNWSQDRNVVTIFSAPNY  
CYRCGNQAAIMEIDEHLKYTFLQFDPCPRAGEPMVSRRTPDYFL

>PPH21

MDTDLVPMQDAVTEQLTPTVSEDMDLNNSSDNNAAEFVDDLKPGSSGIADHKSSKPLELNNTNINQL  
DQWIEHLSKCEPLSEDDVARLCKMAVDVLQFEENVKPINVPVTICGDVHGQFHDLELFKIGGPCPDTNYLF  
MGDYVDRGYYSVETVSYLVAMKVRYPHRITILRGNHESRQITQVYGFYDECLRKYGSANVWKMFTDLFDYF  
PITALVDNKIFCLHGGLSPMIETIDQVRELNRIQEVPHGPMCDLLWSDPDDRGGWGISPRGAGFTFGQDV  
SEQFNHTNDLSLIARAHQLVMEGYAWSHQQNVVTIFSAPNYCYRCGNQAAIMEVDENHNRQFLQYDPSV  
RPGEPSVSRKTPDYFL

>AfPptA

MAASDLEAATALKVQGNKAFAHEWPTAVEFYTQAIDKYDREPSFFSNRAQAYIKLEAYGFAIADATKALEL  
DPSYVKAYWRRALANTAILNYREALKDFKAVVKEPNNRDAKLKLAECEKLVRRLEFEKAIEVGEPPSAFEDL  
DIDAIAVDSSYDGVRLKEMTQEFIDDMIERFKNGKKIHRKYAFQIIKAVKDIVYAeptMVEIGVEEGTKLTVc  
GDTHGQFFDLLNIFNINGYPSETHAYLFGDFVDRGSWSTEIALLLYAYKWLRPNRIFLNRGNHETDDMNK  
VYGFEGECKAKYNERLFKVFSESFSALPLATLIGSKYLVLHGGLFSDDKVTLDDIRKLNHRNQRPQGQGLM  
MEMLWTDQPTEPGRGPKRGVGLQFGPDVTKRCEKNGLEAIIRSHEVRMEGYEVEHDGRCITVFSAPKY  
CDTTENKGAFINIGPELKLDFKVFEAVPHDIRPMVNPVLSCLLKQS

>PPT1

MSTPTAADRAKALERKNEGNVVFVKEKHFLKAIKYTEAIDLSTQSIYFSNRAFAHFKVDNFQSALNDCDEAI  
KLDPKNIKAYHRRALSCMALLEFKARKDLNVLLKAKPNDAATKALLTCDRFIREERFRKAIGGAENEAKISL  
CQTLNLSSFDANADLANYESGPKLEFEQLYDDKNAFKGAKIKNMSQEFISKMVNDLFLKGKYLPKKYVAAIISH  
ADTLFRQEPSMVELENNSTPDVKISVCGDTHGQFYDVLNLFKFKGKVGPKHTYLFNGDFVDRGSWSCEVAL  
LFYCLKILHPNFFLNRRGNHESDNMNKIYGFEDCEKYKYSQRIFNMFAQSFESLPLATLINNDYLVMHGGLPS  
DPSATLSDFKNIDRFAQPPRDGAFMELLWADPQEANGMGPSQRGLGHAFGPDITDRFLRNNKLRKIFRSH  
ELRMGGVQFEQKGLMTVFSAPNYCDSQGNLGGVIHVVPGHGILQAGRNDQNLIIETFEAVEHPDIKPM  
AYSNGGFGL

>AfCaIA

MDQALARAVRDKKPVPEIDFTLHTMEDGTQVSTLERVIKEVQAPALSTPTDEMFWSPEDPSKPNLQFLKQ  
HFYREGRLTEEQALWIIHAGTQILRSEPNLLEMDAPITVCGDVHGQYYDLMKLFVGGDPSETRYLFLGDYV  
DRGYFSIECVLYLWALKIWYPNSLWLLRGNHECRHLTDYFTFKLECKHKYSERIYEACIESFCALPLAAVMNK  
QFLCIHGGLSPELHTLEDIKSIDRFREPPTHGLMCDILWADPLEEFQEKTDGYFVHNSVRGCSYFFSYAAC  
AFLEKNNLLSIIAHEAQDAGYRMYRKRTRTGFPVMTIFSAPNYLDVYNNKAAVLKYENNVMNIRQFNCT  
PHPYWLPNFMDVFTWVSLPFVGEKITDMLIAILNNTCSKEELEDPTSVSPSAPSPLPMDVESSEFKRRAIKN  
KILAIGRLSRVQVLRRESERVTELKTAAGGRLPAGTLMGLAEGIKQAITNFEDARKVDLQNERLPPSHEEVIK  
RSEEERRAALERAQQEADNDTGLATVARRISMSAGSGRSRRQRDAARETREA

>CMP2

MSSDAIRNTEQINAAIKIENKTERPQSSTTPIDSKASTVAAAANSTATETSRDLTQYTLDDGRVSTNRRIMNK  
VPAITSHVPTDEELFQPNGIPRHEFLRDHFKREGKLSAAQAARIVTLATELFSKEPNLISVPAPITVCGDIHGQY  
FDLLKLFVGGDPATTSYLFLGDYVDRGSFSFECLIIYLSLKNFNDFHWLLRGNHECKHLTSYFTFKNEMLHK  
YNLDIYEKCCESFNNLPLAALMNGQYLCVHGGISPELNSLQDINNLRNFREIPSHGLMCDLLWADPIEEYDEV  
LDKDLTEEDIVNSKTMVPHHGKMAPSRDMFV PNSVRGCSYAFTYRAACHFLQETGLLSIIRAHEAQDAGYR  
MYKNTKTLGFPSLLTLFSAPNYLDTYNNKAAILKYENNVMNIRQFNMTPHPYWLPDFMDVFTWVSLPFVGE  
KVTEMLVAILNICTEDELNDTPVIEELVGTDKKLPQAGKSEATPQPATSASPKNHASILDDEHRRKALRNKILA  
VAKVSRMYSVLREETNKVQFLKDHNSGVLPRGALSNGVKGLDEALSTFERARKHDLINELKPPSLDELKNEN  
KYYYEKVWQKVHEHDAKNDK

>AfPtcA

MDFLGLHTFLQELPSHQEARRRPEPTSVVPQLTPNEDLERLLRRHRPAISTIEFGMNYGAEWATQHFAAKLA  
ELWRKAEMFGHIFANTPDTVRDQQLPVIRIRQYLRNVSHSILMPRLASPTTRWALVSKAVNEWLLDWVLN  
ETVVQGFDLALDAEYQLLKHLLRDLEPFVRKVVLNAMVKIVCEILCKPGFKEFYLEKHRWYVEKLRWRYVGR  
LVPDIPNYQTEGRTRIAQIIAKAQALSVDMLLTPLEYVHYFPESDDVFDPIEMVNMMDPTNDRSPGELRRLWF  
RIKLAYTPVTYIRANFEESNTELVRSEVLLMPENTFVALPKRHQNTNSAVSANSRVPKRPEFHDFVFTLLPS  
SSLHPDPRGLSSSYHKFPRSASVPHTGAISHPPTSFAQALVDRETTVRIPLRRAKHHFGAATSRGTRVSNEDT  
HQAGVLDIPAFAKRPPASVTIKRTTAPLENRGADSASGDPQVYFVGFVFDGHGGSECSTFLKDTLHEYIQDTA  
AESEFQSSLSKDRGHFSKNESEICRGDLPIIQRGNHHRMAEMEKTLVQNWRRLVGGYFKRFVPAHFSYRG  
NSAQNGSATGNGDDHTGGVTIEEILEYAFRADLDFVSAQAAKEDDELATAHKPQYQDDILYGPKHTQQ  
MKLGGYRRFKGGSTASVALISTPSPFPWHPSAPSSLLVSHVGDTRILLCSTATGAAIPLTSNHHPSPIEANR  
LRRYAATFVTDSFGSEERMSGLANTRAFGDVQSKRIGVSAEPEIRRIEMGPAEYSFLVLMTDGISGTLTDQEV  
VDIIEAKTPDEGARNVNFATEVTKEGDNATCLVVRLGGWERRLEGGLSLGTESREWRRQEATDPRSS  
RR

>PTC6

MRLGNAYAYCKPSQNVGLKLDLLRGLPGYVGHATSINRLENQDNYSIKMMRSPNAYGSALNCSVFDG  
HGEKGAQLSLLADKLCSSLDPEPSWDKQDLKLVQYARRFPEGNYWKHKLSTFEKFYNKFIKNCNSKQE  
LLMKEGDSAILGQNGGRMIFDKMGNIIDKIALLELDRLRLFYGFARFDLDQCCGLGTAAGSTASSIFLYPYD  
DPNAPIDEGKDDDSWIISHSGLLKLIVTQVGDSKIILCDQDIAHALTTTHHINSRERHRLSIDPSRLDPDAFG  
ETRFLNNFANTRSFVDVAGKPYGISSEPDIFFLVGNTLHLPRSESKLPFNGDECFLALVTDGITNKLADQEV  
VDLITSTVNSWGLKKATPQFVAEETIKFIQAIATKHSNATCVVRLSNWGNWPNVDRTGPQRETKLMNA  
QSNETKLN

>AfPtcB

MRTCSTSEGGQDECCLYGLSAMQGWRISEMEDAHAVALDLQAKSTGGSEKPTDPDKRLAFFGVYDGHGG  
DKVALFAGENVHKIVAKQEAFAKGDIEQALKDGFATDRAILEDPKYEEVSGCTAAVSVISKNKIWVANAG  
DSRSVLGVKGRAKPLSFDHKPQNEGEKARISAAGGFVDFGRVNGNLALSRAIGDFEFKKSPELSPEQQIVTA  
YPDVTVHEVTDDDEFVLIACDGIWDCQSSQSVVEFVRRGIAAKQELYRICENMMDNCLASNSETGGVGC  
NMTMIIIGLLNGKTKEEWYNQISERVANGDGPCAPPEYKSEFRGPGIRNQFEETPDNYDLENDRSRGSV

RSGRIILLGDGTELIPEQNDEELFDQREENRDVTNHLQHDKAEETSTAANLSESPSSANKNSSGSGTEATEKS  
ASS

>PTC2

MGQILSNPVIDKESHSGADSLTAFGLCAMQGW RMSMEDSHILEPNVLT KSDKDHIAFYGIFDGHGGAKVA  
EYCGNKIVEILQE QKSFHEGNLPRALIDTFINTDVKLLQDPVMKEDHSGCTATSILVSKSQNLLVCGNAGDSR  
TVLATDGNAKALS YDHKPTLASEKSRIVAADGFVEMDRVNGNLALSRAIGDFEFKSNPKLGPEEQIVTCVPDI  
LEHSLDYDRDEFVILACDGIWDCLTSQDCVDLVHLGLREGKTLNEISSRIIDVCCAPTEGTGIGCDNMSIVVV  
ALLKEGEDVAQWSDRMKSKAHR TSVRSFADKRRRVFSYDFSKCNDEQVFAITTKK PQDKFTRDHEAAVAS  
VTAADND DPMDIDDDADTDAENLDPSSQSKSKTSGPIDLASLEALLGATGGVKTDSNGNKVTTYTL PQSAL  
AQLLQTMGHDPASSHPENDSNTD HKAGRSHLQ

>AfPpmA

MILLASSRRACSLACSSLPVARDRSLSFATSTATWSRHLPDSLFLSSQRLSSSYLPRFSRRTFHATSLFSLDAP  
RISYRVAASSPKNRRFHPPTNFHNFQPELHDAIGVVTEEIDAATRRKRRPDSGEDAFFVSRVGSQDSGAIAF  
AVADGVGGWVESKVD PANFSHALCLYMALEALSWDSSTDKLRKNLLQSGYDQLVADKSIRAGGSTASVG  
VGLEDGQVELANLGD SGSM LRLAAVHHYSVPQTHGFNTPYQLSIIPRMRAQASIFGGSFLEDSPRDAVV  
TNLHMQHGDVLM LATDGVYDNLNNQDILKLITSRMILTGAWTATDLGIKVSDNLGALTGPDGLASLLPW  
PSPSPKPSAADPSTSGNVAPSSRINQHHTLQSLLASTVAGEAKRASMDSRRDGPFAKEAQRYYPGDWYRG  
GKVDDICVLIIVAVEEGRGHESC

>PTC7

MFANVGFRTL RVSRGPLY GSCSQIISFSKR TFYSSAKSGYQSNNSHGDAYSSGSQSGPFTYKTAVAFQPKDR  
DDL IYQKLKDSIRSPTGEDNYFVTSNNVHDIFAGVADGVGGWAEHGYDSSAISRELCKMDEISTALAENSS  
KETLLTPKKIIGAAYAKIRDEKVVKVGTTAIVAHFPSNGKLEVANLGD SWCGVFRDSKLVFQTKFQTVGFNA  
PYQLSIPEEMLKEAERRGSKYILNTPRDADEYSFQLKKKDIILATDGVTDNIATDDIELFLKD NAARTNDELQL  
LSQKFVDNVVSLSKDPNYPVFAQEISKLTGKNYSGGKEDDITVVVVVRVD

>AfPtcD

MGPLSSSASGD KLALKDAGGNSALGSRPSQQDQYTILLPAQIPFKTEKTLFLGVYDGHVTS DVSLSHAKQHF  
HRLILESPDIQAGSYEKAIEGAVQKEDQLLLDQFRAGNEVFGKSGSTFSVCLVDLTDGVLVVG NLGD SHVLLG  
EHYPNGWEVQRITKAHKPGSDTEKERIKEAGGVNRELGSPRIAAGALNMSRALGDLQYKAPLINADEPFSL  
EQEIAGFNPDK EQGDLLSNRPAISR IELKEDRKYIVILTTDGVTDDEMEDRRILDQVVAHWNYGTRAEGVAGKI  
TTEATGGPMSDNATCICAFIYGRQAA

>AfPtcE

MFRNTILSTSDALLLFDAGAGQVQGARPFEQEDRCTFVLPDQFPSQTNDKLT YFAVYDGHGSELVSDHASRN  
LHLLAKRPEFDQGDYEA AIRGALIDEDAVLLETFNNTTEPAVSGSTVALCFVNLT KGDLVVANLGD SHVLL  
AERDNRDHP SHIRRLSKSHKPDTPDEKSRIEDAGGAVNTRRG TARLGLSNMSRALGDLQYKNPINNAGDE

YSSSKTRRASASTSAPETRGNFLSVEPHMTRMTLSPDRRYLVVVTSDGVSDNIDDATLIHHVMRLSMRGMR  
AGDIAQEIATTAQAQKAKGGSDNASCIVALLDGQNT

>PTC3

MGQILSNPIIDKEHHSGLDCLTAFGLCAMQGWWRMSMEDAHIVEPNLLAESDEEHLAFYGFIDGHGGSSVA  
EFCGSKMISILKKQESFKSGMLEQCLIDTFLATDVVELLKDEKLKDDHSGCTATVILVSQLKLLICANSNGDSRTV  
LSTGGNSKAMSFDPKPTLLSEKSRIVAADGFVEMDRVNGNLALSRAIGDFEFKSNTKLGPHQVVTCPDII  
CHNLNYDEDEFVILACDGIWDCLTSQECVDLVHYGISQGNMTLSDISSRIVDVCCSPTTEGSGIGCDNMSISI  
VALLKENESESQWFERMRSKNYNIQTSFVQRRKSIFDFHDFSDDDNEVFAITTKKLQDRLNRSKDNDDMEI  
DDLDELGSSATPSKLSGEDRTGPIDLFSLEALLEAGIQIRQRPSSSDGNTSYFHGASLSDMLASLSNAAAGE  
TEPNDAADDNDNDGEENGNENAKKGGSKIEIE

>AfPtcF

MRRALQTFRTARRVPVWVKVGARRPSVVSFSHNHQPLGLRLSSRGRHPSFIPATLQSSMHLRNFLAVISTV  
VASGAWYAYQGSNSPQSPVTSPSQTRSIATDASSGPHAEESAESTRRAILVDNDQFYTATLSGDQPLYKQTD  
DSDRRILEMLTPEQATQKLRNEQSFMVNRGKGVVRYDVVQVPSNSPIEDDHAEKIVEPSSVAAAANDGG  
STSDWMFWAVFDGHSGWTTSAKLRNVLISYVARELNTTYKAAATNPISLSPSEAVDAAIKQAFVRLDNDIV  
HSSVDKVLKSNRRAAAELLAPALSGSCALLAFYDSQSKDLKACAGDSRAVLGRRGPTGKWTATPLSEDT  
GGTPSEMKRLEEHGEPNVVRNGRILGQLEPSRSGDAFYKWSKETQEIKKQFFGRTPHLLKTPPYVTA  
EPVITTTKIEPSKGFVVMATDGLWEMLSNEEVVGLVGQWIDQQRAGNNGTSKAWLQSWFGLDDKHL  
VEAPKETTTEGQRRPIRQQYDISGVASRFVVEDKNAATHLVRNAMGGKDRDMVCALLTLPSPYSRRYRD  
DITVEVIFFGDGPDRNRTITVNQEASASEENQKAKL

>PTC5

MSPLTRTVAIKKTVKVLKQCSGREYTKFLQRAYSTSHANSTYYSRTKLFISHSKALNIALLSGSLLLTYSYYS  
PKKILSLDTINGIKDYSTNTSGNINMPSPNPKGTETQKSQRSQNDQSVLILNDSKIEAKLHDREESHVNRGT  
GIFRYDVAQLPSNHPIEDDHVEQIITIPIESEDGKSIEKDLYFFGIFDGHGGPFTSEKLSKDLVRYVAYQLGQVY  
DQNKTVFHSDPNQLIDSAISKGFLKLDNDLVIESFRKLFQDPNNTNIANTLPAISGSCALLSLYNSTNSILKVAV  
TGDSRALICGLDNEGNWTVKSLSTDQTDNLDEVRRIKEHPGEPNVIRNGRILGSLQPSRAFGDYRYKIKE  
VDGKPLSLDPEVAKLYFRREPRDFKTPPYVTAEPVITSAKIGENTKFMVMGSDGLFELLTNEEIASLVIRWMD  
KNMNLAPVKAEPGKLPKVIDVSEDKEAQRPAFRYKDNSSSPSGSNPEYLIEDKNVATHLIRNALSAGGRKE  
YVSALVSIPSPMSRRYRDDLTVTVAFFGDSGTPSIVSNATSIVMNPEATTKPKPRL

>AfPtcG

MFGSSSPPKDKLETIPHSEAITPSLTVKTDATVSQKKFSPPSGFFGRRASDEPSPGGEKKRRSSTVTKAATL  
FSNAKNSLSWSNSRETAATLVAHSPPTSLHKLGRMDPALIVPQGSLNNSAGESLTPRSSFRVGTEDRNR  
RCRRTMEDTHAYLYNFGTAPSGRADVNGRRQSGDVSPSAAEETS SVVETDNGYFAIFDGHAGTFAAECW  
GKKLHLILEEVMRKNPNTVPPELLDQFTSVDQQLKPLKNSGCTAVIALLRWEDRVPCSHSVTGSAALAP  
AAVAAAAEPNSEADNTPTQSAPVSVLPTLQEKASRQRVLYTANVGDARIILCRNGKALRLSYDHKGSDENE

GKRIANAGGLILNRRVNGVLAVTRALGDAYLKDLVTGHPYTTETVIQPDQDEFIILACDGLWDVCSQAEAV  
DLIRNIQDAQEASKMLVDHALARFSTDNLSCMVIRFDNNRVKEVVNRAVDPIGVDGDPVTHVGYGVSEAD  
KIVEGARKSMANTEITDNVEPAEKVMDEVLQKMADDGPGPEIPIEATSPNKVESVH

>PTC1

MSNHSEILERPETPYDITYRVGVAENKNSKFRRTMEDVHTYVKNFASRLDWGYFAVFDGHAGIQASKWCG  
KHLHTIIEQNILADETRDVRDVLNDSFLAIDEEINTKLVGNSGCTAAVCVLRWELPDSVSDDSMDLAQHQRK  
LYTANVGDSRIVLFRNGSIRLTYDHKASDTLEMQRVEQAGGLIMKSRVNGMLAVTRSLGDKFFDSLTVGS  
PFTTSVEITSEDKFLILACDGLWDVIDDQDACELIKDITEPNEAAKVLVRYALENGTTDNVTVMVVFL

>AfPtcH

MRVSGSRKVAQHAKRHISELLFEGDALQAGRFEAIRQAIQKEETLLEECQEGEDKFAISGSTVSVVIVNLN  
NGVMVHRLTQDHPENPKEKERIEDAGGVVNYASETARIGALNMSRALGDLQYKNPLNNDTMGPSTAGQ  
EIAAMTPSIEQGSFVSSEPSIIRVDLRQDRRYILALTTDGVTVLKDVIINEIKTRHEGGLGVQQVADELVRG  
VTQGERRDNATCIAVFLDGCLS

>PTC4

MGQLLSHPLTEKTIEYNEYKNNQASTGIVPRFYNCVGSMMQGYRLTQEDAHLIRNENSVVYVRRFFNPFDKYE  
TSLSNVFAVFDGHGGDDCSKFLSGGRHHRDGNSSNGGEPNAGLIKWIAYSFENHHYTSTTNDSSKFK  
RSFNTLEGLVSQIFKDAFILQDEELRHFANSSCGSTAVVACIINEESLYVANCGDSRCILSSKSNGIKTMSFDH  
KPQHIGELIRINDNGGTVSLGRVGGVLALSRAFSDQFKRGVTPHRRKLTNITQNLTYGTPPQEAQVTVPE  
DVLMLKIDYSKDEFLVLACDGIWDIYNNKQLIHFIKYHLVSGTKLDTIITKLLDHGIAQANSNTGVGFDNMTA  
IIVVLNRKGETLQDWFNKMKTRLERERGLV

>AfNemA

MNSLNILSSRVIGQTSNSNRLRQRSRSQGEIGPVAPPEDRSKLSYSHDNLHSPDVLEKSHNNAPGISSADID  
YSEHTLTKSPLIQSIQRDGPLATRSTLGLIAERFFDAIAETIKFILSTLAAPGVFLAQCFRDDDQYSPMAPVR  
KLRRSMASVSASRRSTS AKKEPKPTGARRRSGSTRKLRSHVSRDSIASSTSESEGDRRSTQCLTSTRARPVSKS  
TTALDPTQEEGTPRRSIRIKLHNAGALKRERQRRTQSADLGATSETGAAAGQGAVNPDTLKSPTSPSVHKVT  
KYPHSPVPPRPLIPARLPSYTAAPRNSRAPQKTLVLDLDELIIHSLAKGGRMSSGHMVEVKLATPMTTALTP  
GGSPPTLGPQHPILYVHVRPNCDLFLRVCKWYKLVIFASVQYADPVIDWLEQERKYFHARYYRQHCTF  
RNGAYIKDLSSVEPDLKVMILDNSPMSYLFHEDNAIPIEGWINDPTDNGLLNLIPMLEALQYVTDVRAFLAL  
RRGEGEI

>NEM1

MNALKYFSNHLITTKKQKINVEVTKNQDLLGPSKEVSNKYTSHSENDVSEVDQYDHSSSHLKESDQNQ  
ERKNSVPKPKALRSILIEKIASILWALLLFLPYLIKPLMSLVFVFTFPLSVIERRVKHTDKRNRGSNASENELP  
VSSSNINDSSEKTNPKNCNLN TIPEAVEDDLNASDEIILQRDNVKGSLRAQSVKSRPRSYSKSELSLNHSSSN  
TVFGTKRMGRFLFPKLPKSVLNTQKKKKLVLDDELIIHSASRSTTHSNSSQGHLEVEVKFGLSGIRTLYFIHKR

PYCDLFLTKVSKWYDLIIFTASMKEYADPVIDWLESSFPSSFSKRYRSDCVLRDGVGYIKDLSIVKDSEENGK  
GSSSSLDDVIIIIDNSPVSYAMNVDNAIQVEGWISDPTDSDLNLLPFLEAMRYSTDVRNIALKHGEKAFNIN

>AfFcpA

MLLRPPSLHYPITVTSLLKQPGDIVERDEALFWYVYQTTVTEGDGLGNKIEVQRKFPTKFESTVDGEVVQW  
KIAKGDVIEVPIDIVEIDEPKAHEVQFGGLCAECGKDMTEATYNTEVMDSTRAPIQMVDHNTALTVSEKEAT  
RVEEDAKRRLLANRKLVLVLDLQTIHATVDPTVGEWEMEDKDNPNHDAALGDVRAFQLVDDGPGMRGC  
WYVYKLRPGLESFLQNVSELFELHIYTMGTRAYAQHIAGIIDPDRKLFGRILSRDESGLTAKNLQRLFPVDT  
KVVVIDDRGDVWRWSPNLIKVSYPYDFVIGDINSSFLPKKQELGGVVQPAEQDAKGTKEKELPMQQPPPN  
RAIAKPAAEVSTLEQLVTMGGGDNPRLLREQSVAQEETIMHQVEDRPLLQKQKELDAEDEAAESGDSASSV  
EDTQDSTKHRHLLLEDNDRELFVLEERLEQIHRHFFEEYDKKRSRALGGRVAALRGERGTSKEKDIDLKLVDP  
VKDIMPRIKHRVLGGVVLVFGVPLGTDTQNADISLWAKSFGAVISTKINMRTTHLVAGRNRRTAKVREATR  
YPNIKIVTTQWLLDSLQWKRLEEEPYLLPVHPDDRGEPISPGSKELESGLWSSSDDDETTGGFWTDDDEGSQF  
NEEILKFSGLNEMSPIGYDAEEQAAVHDELKEFLGSDDESESDSEISLLAAGKKRKRDDDESQGTDEDESQGG  
QGEEGEMEGSRLSRIKRSYERTTGLKEVATADTTSTAELTHTSLPKERSGGETDDALNDLNESEEPVARGQ  
DVVSYPEDEDELEREMLAALEDGDYDPKAEIEIAAENG

>FCP1

MTTQIRSPQGLPYPIQIDKLIPSVGSYLHEGDRLLVYKFWYLVERASDTGDDDDNEHDVSPGGSAGSNGVSP  
TKQLRESIEFFESPYEGDLISWNVVDVGDEVATANQVICEIKRPCNHDIVYGGGLCTQCQKEVSADAFDGVPLD  
VVGVDLQISETAIRTGKALKEHLRRDKLILVLDLQTIHCGVDPTIAEWKNDPNPNPFETLRDVKSFTLD  
EELVPLMYMNDGSMRLRPPVVRKCWYVYKVRPGLKEFFAKVAPLFEMHIYTMATRAYSALQIAKIVDPTGE  
LFGDRILSRDENGLTTSKSLAKLFPDQSMVVVIDDRGDVWVWCPNLIKVVYPYFFVGVGDINSNFKPKQS  
TGMLQLGRKTRKQSQESQELLTDMIDNEKKLQEKIDKEVKRQEEKLNHQLATAEPPANESKEELTKKLEYS  
ASLEVQQQRNPLAKLQKHLHDQKLLVDDDDDELYLMTLSNIHKTYDMLSQQNEPEPNLMEIIPSLKQKV  
FQNCYFVFSGLIPLGTDIQRSDIVIWTSTFGATSTPDIDYLTTHLITKNPSTYKARLAKKFNPKIKIVHPDWIFEC  
LVNWKVDEKPYTLIVDSPISDEELQNFQTLQKRQEYLEETQEQQHMLTSQENLNLFAGTSWLNNDDD  
EDIPDTASDDDEDDHDDDESDDENNSEGIDRKRSIEDNHDDTSQKKTKAEPSQDGPVQHKGEGDDNEDS  
DSQLEELMDMLDD

>AfPsrA

MLGGSSSERGSPNTSSKPTGEVPMMPANAGNTDSGPGSSLQDNSKSDASPPKPVPEPTEPASAPVPSTQA  
LGNAPTNTNDPSKQQHLLVPSQSRSSSKADGQSTLDNRQDAAHDDSENTLRGSRRSILKGRDRSRGSSK  
RSWRPSQGPTGTDEQKTATDSEARDNPKPKVTLRLFAFLSCSSSGVDPDDSAIPPKKTRRPSAPAT  
QPTPEKADLNANHSNRTESEEAFLGEEKPNLTVTSHQPSREEEKPARTSEEGAQLDANLSSSDKVESSHEP  
ASQYGVQVDTTRTGAPQNAQIPVIVATETEKANDLEIKPEEPMGSLPLPAIEDSSTSTEAPQTSSAVEHNDVKS  
SHEEETLPAKIPPPPPQVPMGKQIQIATPERPQQWLLPPLPHLRNRKCLVLDLDELTVHSSFKVLERADF  
TIPVEIEGQYHNIYVIKRPVQDFMCRVGEYEVVVFASVSKYGDPLLDQLDIHNVVHRLFRDSCYNHQG  
NYVKDLSQVGRDLRETIIDNSPTSIFHPQHAIPSSWFSDAHDNELLDLIPVLEDLAGAQVKDVSLLVDVTM

>PSR1



MGFISSILCCSSETTQSNNSAYSRRQQSSSLNKNRSVKHSNTKSRTRGVHQTNSPPSKTNSAATFSSTERSTG  
KSGISTNDNEKKKPPSSPTAAVTATTTNNMTKVEKRISKDDLYEEKYEVEDEEIDDEDNRRSRGIVQEKGDA  
VKDTSRQKQKQQQQQQSQPQPQPSQSQSQSQSQQRGPTVQVSSDHLIQDMNLSRVSSSSQASET  
SNDADDEDEDEEYIDLTLQQGQYHAPGYNTLLPPQDESTKGKKCLILDLETLVHSSFKYLRSADFLVLSVEI  
DDQVHNVVYIKRPGVEEFLEVRVVKLFEVVVFTASVSRYGDPPLLDILDTDKVIHHRFLFREACYNYEGNYIKNLS  
QIGRPLSDIIILDNSPASYIFHPQHAIPISSWFSDTHDNELLDIIPLEDLSVKTSLDVVGKILDVTI

>AfPpsA

MATVLVQQTLRHATPPPAGISSSLNLTRTPSPVPNKHLVPCPPGTSTAALRTAVQSTKEDKKVTSLLYPPDFTF  
LRVKNKSPSIYSIDIVTLAAALDYWASQPLPDPSQVFPWLHGLHPENHLQLGFFTNRRLRRIPQCWRGITIV  
KVGDDLSTSRKLGAVSPSEILAPSGWDFIPSDPKEGFSVRNFQIQTPKLATLSDIVVYGQDGVHKKQLLEVAE  
KIATAQYRWRNKNDPDGLLPTYHTFILSIHWERLEMCEMTKASEISKNVWQGPTDYILQCGSGDSVHVED  
FDLLIETSDLASIPGRYLAKLNRQLDDDDGPLRLEFPSSGSLVPSAETREIDDLVSTVRWIYLANPDEPESP  
TDVGGDIAMTPLQRKPRRILHCPDGYTESSLLVIAYLMFAEGIPAHEAWLRLHCDRKRNFAYPSDVTFSTI  
QTRLLHESPATHSESLSSVPDPPWFRYCDGSLPSRILPYMYLGNLGHANNPEMLWALGIRRILSIGESVSWR  
DFDIARMGPENVMHITQVQDNGIDPLTQEFDRCLFISEF

>PPS1

MVLEVPSITPGELHDLMLRHQDAEWPECKMFPWAHDISFGQPPDFPHSLAIVKSQSDANNSALLRNSLE  
VNDIFQSWKVRTSFHREGDTCETGNDNGFQYPNNTKELLNLLKFQIRQLELQVDDVALENAATYCHNHISI  
LPFLKVDPRGLSELEKRYSRNKVGSNTTLKRSGQDVWGRRLFRFDLQCAKMIEMVDNIVYCSRTGGST  
MQTESAPACSHGNCPCNTTLALLLQICLMFVQKGYVGSGLYKTNLFICTYQNFNTDIPQTLIGTPLLDNE  
FFKNNTPLNLCSSPSEIVCFNNVDKMMVLCEKLELNKLTSAATRELETGLICGNTTDWHNYQIIKNNISLTHRF  
EENTSIVNLKSLNYDTPNTTISQLYNIPNTKEVWKLIIKTSNSQMPSLTKIRTYLDDDDDDASKSQEHLHL  
TFPASGSIGLGNLNIQSVEILLNVCYLIFQVSQVQELLTFMYCEDGYTETSLLTAYIIFHFNIPLQDALLRIHPRP  
FFLFPDLQILGHLQPVREFSPQNGSNLKYANALKFRDKSFQLHISSELSIFFMKIPLESNFVNLKGPLPSRI  
LRHLYLGLSDHAQNPAKSLGITHIVSVGEVSWTLNKDKIAHPVRPHRAITMTNTNEVAGNTTCNKSRNR  
ADTVVSDKQENGSNVVISENSGFQICQIENLDDNGKDPFHQIDKVLDFISNSEATGGKVLVHCMVGVSR  
ATVCIAECMRYLQCDLASAYLFVRRRLNVIIQPNLFFVYELFKWKKHYNREKDKTMDWHIICRGIAEVN  
MKYT

>AfDspC

MAMNKIPGHDIYIGGILAVKNKAALSRANITHIVSVLRLNQPDEIFANFQHHCIAHADDVGDENLLEHFPSAIK  
FIQGLDAGGSVLVHCAMGKRSATICIAYLLHQPSALTPQSALALLRKGRLCEPNDGFMEQLALYHEM  
GCPDDVTGHPLYNRWLYRREVEDSVACGRAPEMQSVLFEDEQPHRPQETSRLTEIKCRKCRRTLATPFII  
PHGPRQNNKATECAHIFLHPLTWMRPSLFPNTTDDSEATEYGSRPDDAPLSGRLTCPNTACGANIGKFAW  
QGMQCNCGEWVVAIGLAKARVDISDRFNMARGPGGLPAAFGIRMPPGMRAPDDSGAGRGNL

>YVH1

MAGNANSVDEEVTRILGGIYLGIRPIIDHRPLGAEFNITHILSVIKFQVIPEYLIRKGYTLKNIPIDDDVTDVL  
QYFDETRNFIDQCLFPNEVEYSPRLVDFKPKPQRGAVFAHCQAGLSRSVTFIVAYLMYRYGLSLMAMHAV  
KRKKPSVEPNENFMEQLHLFEKMGDFVDFDNPAYKQWKLKQSIKLDPSGSELVSNMGMFKDSESSQDLD  
KLTEAEKSKVTAVRCKCRKTLALSTSFIAHDPPSKESSEGHFIKRAANSHRIIDIQESQANCSHFFIEPLKWMQ

PELQKGQEELEGKFCSSKVGYNWKGSRCSGKWWIPAIHLQTSKVDQFPLQSTALPNMVFSEKVN  
NR

>AfDspD

MEVGKMDADRSSSKRSFAQVASATLLSFQLSGCNQCTSVFAPAPRESCDPESVSPFKRRSTSRPWSIMPVQ  
TSPPLPDSFPLMSVFGGISPKFAEGGEHSAALKPLRVPPHVTINTSRRPLPFRHRTSISVTSGSTDSSPTTTI  
STFDSPVAADTTPSSSPESPSAMPLSFPKFMPPSRNIEHQSLSGEPSTMSKPSQDVISRARPDSPGRRARNLK  
NLSLRMPPPSQSSRPAIATASVVETASQRNLSAPPSPAHIPKSSRRKPANLTIQTPLDRSFSSNVMEMVPP  
TPGGLHSLRHTESSPLTSVFSFSGPKGGMQLPRPVTHHGSRRPSGASEHNFSPIQSAVEEGSPVGGVLHE  
LEEEEDHLDSRESTRQNERGYPNGPVQIYDSGVYLYLEPTMQEAAQFDVVVNVAKEVANPFANAQGDNGT  
VMSAWRSASAGANRSSTAEPPTAVSEVSFKSAFEYLPSETESPVTPCSDSSRPEYIHVGWDHNSEILDDLLPL  
CQLIDSRVSQGGKVLHCQLGASRSASLVIAYGLYKNRHLDFNSMYEIVKGRSRWVGPNMSLIYQLTDFRSRL  
QQLSGTSKPAPEEWFVNGPRRGSEPQSSRSERTTEASLTPSSSSCNSGYSRIATPASWSQTSSGTLVSPSTE  
RATPPSVSPWRIPKSLSHKRSLSRPLPLRQRFETAQTAADVGTRSLAPADAIEKDTVEDPLNLFSPRTSQFL  
APSLAPFPDGLDRPLGGPHFRTEADPRSPPPGNERLIMRNIDEFL

>MSG5

MQFHSDKQHLDKTDIDFKPNSPRSLQNRNTKNLSLDIAALHPLMEFSSPSQDVPGSVKFSPSPTPLNLFMKP  
KPIVLEKCPPKVSRRPTPPSLSMRREASIIYTLPTSLKNRTVSPSVYTKSSTVSSISKLSSSSPLSSFSEKPHLNRHV  
SLSVKTKDLKLGIRGRSQTISGLETSTPISSTREGTLDSTDVNRFSNQKNMQTTLIFPEEDSDLNIDMVHAEIY  
QRTVYLDGPLLVLPPNLYLYSEPKLEDILSFDLVINVAKEIPNLEFLIPPMAHKIKYHIEWHTHTSKIVKDLRSLT  
RIIHTAHSQGGKILVHCQCGVSRASLIVAYIMRYYGSLNDAYNKLKGVAKDISPNMGLIFQLMEWGTMLS  
KNSPGEEGETVHMPEEDDIGNNEVSSTTKSYSSASFRSFPMTNLSSPNDSSVNSEVTPRTPATLTGART  
ALATERGEDDEHCKSLSQPADSLEASVDNESISTAPEQMMFLP

>AfCdcA

MSGYMGPGQVIEYIQDRLYLASYDSPPDPKAPFPFPLEQAKSPSKRSTRGQPQTPSKKRYPVYFTADDTLF  
YNSFHADFGPLHIGHLYRFAVHFHEILGEPANKDRAVVVFYSKSDSRSRANAACLVACYMVLIQSWPPHLALA  
PIAQADPPYMPFRDAGYSQADFTLTIQDVVYGVWKAKEQSLCSLSSFSLEEYEFERVDMGDFNWITPQFL  
AFASPQHEPVALIPSNTPEYAALPSTVSQVISSKLPFPKNVLAHFATRNVGLVRLNSELSPSYFTALGINHI  
DMIFEDGTCPPPLVRRFIKMAHEMITVKNKGIHVHCKAGLGRGCLIGAYLIYRYGFTANEIIFMRFMRPG  
MVGVPQQHWLHLNQGSFREWWFEDSMKEKLAQMOPAPITPGRGSTKQRANNGPIATPPNNSHRSKSA  
LGEIDHNEGAGTQSEYLPAPTGPQRKSHRSDSRHHPYARTTSGTLLLDKDMNKTEEQTRQRSSRLSNDSS  
ESEEEIQLRMLAKRSSRSPVASPSQRSVSYSATVTASYTLTDIHDRENWGEAGHAAPKTPLSSKSGSGAIS  
VTKVRTSPRRVTDSSRSASKGVRKISGRIGSTGSPTRVK

>CDC14

MRRSVYLDNTIEFLRGRVYLGAIDYTPEDTDELVFFTVEDAIFYNSFHLDFGPMNIGHLYRFAVIFHEILNDPE  
NANKAVVYSSASTRQRANAACMLCCYMILVQAWTPHQVLQPLAQVDPPFMPFRDAGYSNADFEITIQD  
VVYGVWRAGEKGLIDLHSFNLESYKEYEHVEFGDFNVLTPDFIAFASPQEDHPKGYLATKSSHLNQPFKSVLN  
FFANNNVQLVRLNSHLNKKHFEDIGIQHLDLIFEDGTCPLSIVKNFVGAETIIRGGKIAVHCKAGLGRG  
GCLIGAHLIYTYGFTANECIGFLRFIRPGMVVGPQQHWLHLQNDFREWKYTRISLKPSEAIIGGLYPLISLEE  
YRLQKKLKDOKRVAQNNIEGELRDLTMTPPSNHGALSARNSSQPSTANNNGSNSFKSSAVPQTSPGQPR

KGQNGSNTIEDINNNRNPTSHANRKKVIESNNSDDESMQDTNGTNSNHYPKVSRRKNDISSASSSRMEDNE  
PSATNINNAADDILRQLLPKNRRVTSGRRTTSAAGGIRKISGSIKK

>AfDspA

MTPARCI EASMSEKEGSHYVRTHEYTSGSAKTRLPISAPSFDDDNSLQEVISHTSHDFQEGEFVCPGFFQM  
VNPNGFVHRVMAPDWDYMMRRQAQAILPFLYLGPVSLKDKAWLAQEGFTLLAIRNKRSAQARLVSGE  
KVGAE LGIEADAVDVM DNQELISAFPYAIRRINDHLVSCGPAVHSNAPKKIFVFCESGNER SATVVIAYLMV  
MLNLNMAVASHLVQLRRFCICVEEPLRELLASFQSILDAKR DVYKAIQASTSDSTSGIPQATVSRKRNIADRF  
DEPTGSGG DMLGLEMDMNMNIMDDGAIDSRKPLAPFQDRSD

>AfPtpB

MAHPAIKIDTSVQATKRALPEDTEGGFDVVGSELDDPGLDTGDNELVPPFLCQSAIEIHQKFELEWLQRA  
RFAEGLSNDPAHRWALEADPEVRARNRYVNVQAWANSRIHLRVPEGECDFINASPIVLTDSVSQEERSYI  
ATQGPVGHFAHFWHMVFHESKDVAVIVMLTQTVESGREKCAQYFPLDHRP SMILRHEDDDPFEHNEE  
YEEANDNMGEVTLLESSFDQNSRSEVRKRLRLANESKIVWHFLFAGWADYSKPEGEDREALLHIELSASK  
CSSDNPRIVHCSAGVGRGTGFIALDHLLRELESGQLLKVTDSTQDPVFETVNRMREQRMMMVYNEMQLQ  
FIYEVLR EQVDLKLGRKTSNAGRRLDERSAKMAKLSNSSEYLP SHKPELEPVNDGPSP

>PTP1

MAAAPWYIRQRD TLLGKFKFIQ NQEDGRLREATNGTVNSRWSLGV SIEPRNDARNRYVNIMPYERNRV  
HLKTLSGNDYINASYVKVNVPGQSI EPGYYIATQGPTRKTWDQFWQMCYHNCPLDNIVIVMVTPLVEYNR  
EKCYQYWPRGGVDDTVRIASKWESPGGANDMTQFP SDLKIEFVNVHKVKDYTVTDIKLTPDPLVGPVKT  
VHHFYFDLWKDMNKPEEVVPI MELCAHSHSLNSRGNPIIVHCSAGVGRGTGFIALDHLMHDTLDFKNITER  
SRHSDRATEEYTRDLIEQIVLQLRSQRMKMVQTKDQFLFIYHAAKYLNLSLVNQ

>AfPypA

MATYDNTLSGNLAPTTINTMSCEQCAELLETCGNDVLLLDVRPYAHYARGHIKGSNLNCIPTLLKRTSFDTR  
KLANTFTSDIDRRSFSRWKQCRYIIVYDAATLDMKDAVPMINMLNKFTAEGWNGEGSILRGGFKVFCNQF  
NALVQQPESSNPGISSNKPNSMQISLPPFAPIAGGCALPESSAAIPFFGNIRQHMDLMGGVGQIPLQLPQ  
NLTDSKRRLPRWLRDASDVEDGGQKVSEKFELEKELDRMKQALS YEMTG VSTSAQAPSKKYRVAGIEK  
GNKNRYNNIYPFDHSRVRLQDVPSGGCDYVNANYMKA EYSNKRYIATQAPVPETFDDFWRVIWEQDVRIV  
VSLTAEIERGQVKCHRYWESGNYGPF RVN NFSERRIPMKASGSRQNQGQSTTSLSDSSEEPSEPCIIVRHFG  
SHSAFPFQPLREVTQLQYPYWPDFGTTSQPSHLLQLVDECNAIIRATSNTCFDTRKAMPTEHRPVLVHCSAG  
CGRTGTCTVDSTEPREISERPDTGWYINDNVDLIAKAVADFRTQRPSMIQNL SQFVLCYESVLEWMVVQ  
MDEGCENP

>PTP3

MKDSVDCPSILPTDRTSVLSETSTLVGSSSHVYSRHAPMNSYHNSMNSNIYHSPKASSPLVSYKTSSPVLLKR  
ATAPVLPSFKPKEQRYNK PQGCSLITAVELGKIIETLPDEKVL LLDVRPFTEHAKSIITNSIHVCLPSTLLRRKNFT  
FSKLLDNLTPSEQSVLKS KLAI DNLR IIIYDSTANQT ESSLPCYGIASKLIEFDTNVKKTVSILMCGFPQFKILFP

DHINTNTFNSDCISSAEPKSPKTNLMNSLHNTAPHMTATTPLSSPQMNLKLVKVPDDSRSDHSNFSSSPSPRN  
VLSDSPMSSSSPISALFKFQLPAPQTNINQMFKFSQNEEIMGLETYLSAVNIKEEHERWYNNDSSAKKSLQNF  
QFPKNQNSLEKDTNKDKLGFQIRYENLSKNEYEVIDSVIPEWFQHLMSIPKIELVSQFQKLDLFLEKRRLNHS  
VFRKKENSFILEKPPSSYPEQLTSTSSSTIMPPKFPDVNKVQKRSHSQPIFTQYSKYKSMLSLESDDSDSEDDVII  
SSGVELGAKNRYKDIFPYEHSRVILKKGLQSSKGIKSHSTSDGGILDNYINANYLSLPRFSVEQNSSFQTTTTT  
TRRVRYIATQAPMPSTVHDFYTCILNNGVPLVLSLTNDFENGIEKCYRYWQEGNYNGIHVKLLEKKILKMPST  
TSMRKNTMGQTQNSLYSAGVQGNSSNYSTDNDNDNDNNNNNNNNNSNIAVTAACDDDDDDDDDAILI  
RKILLTYHDQEKPYELLQIQVKNWPDGLTLLNPISILQAINVKNHIIDTLFARNYYQNDQLPTILVHCSAGCGR  
TGTLCITIDSILSNFEMFEMLQKEFVVKLYPAKLFDPISWTINIFRKQRISMVQININQFIFIYDCLLFYFRLRDDI  
TERTDGDGNSKDNISLSALIEQIEKLEILQTFVDDKLELPQ

>AfLtpA)

MYAAAAEHCFACNIPHLNDRKNEHQFINQAVDIGALVHGLQWRDLGVVLGHWANGKPICLSLPQCHTPN  
MSALWLSPLKITLRRKGTNITSCIEEFYLLRLRFGKIPYLFQHNHIFLSSVLGISIFHGYIRDNLIAPYQQKSSSYH  
AVAGALFVELVDVPEECLVAEGGATWQNSYRCGGVCNIGDAYMHLSQCLFNHQASQQTTIAMTASES  
PSAEHKVNVLFVCLGNICRSTMAEGVFRNMASHTPLINEIDSAGTGAYHTLEPPDSRTMSTLRRHGITNYNH  
AARKITKDDFLHFDYLLAMDKNLRDLDLVRESVVASLRKSGGAKGPRASSGGAGAKVAEVRFLGDFGPGG  
VLHDRVGGGEVVQDPYGGVNGFEEVYQQVVRFSKSFLEYLEKKQGSEVEE

>LTP1

MTIEKPKISVAFICLGNFCRSPMAEAIFKHEVEKANLENRFNKIDSFGTSNYHVGESPDHRTVSICKQHGVKIN  
HKGKQIKTKHFDEYDYIIGMDESNINLKKIQPEGSKAKVCLFGDWNTNDGTVQTIIEDPWYGDIIQDFEYNF  
KQITYFSKQFLKKEL

>AfSsuA

MAHDPRLSSAGTATPNPPPPPPPPPEPSTTGTGETQAAEPSAPAQSSDSFKLKFCTVCASNQNRSMEAHL  
RLSTAPSPFPVISFGTGLVRLPGPSITQPNVYNFNNTSYSQMYDELLAKDERLYRNNGLLNMLDRNRNLKW  
GPERFQDWVPGMPRVHDVSKGDKGALGTEGGTVDVIIITCEERCWDAVVDDLMNKGAALNRPVHVFNV  
DIRDNHEEALVGGKAILELATRLNDAATQERKIHGAEWENGNGEARRSFDERVPEILASWQEKWPNLPAL  
WTLAWL

>SSU72

MPSHRNSNLKFCTVCASNRRSMESHKVLQEAGYNVSSYGTGSAVRLPGLSIDKPNVYSFGTPYNDIYNDL  
LSQSADRYKSNGLLQMLDRNRRLKKAPEKWQESTKVFDFVFTCEERCDFAVCEDLMNRGGKLNKIVHVIN  
DIKDDDENAKIGSKAILELADMLNDKIEQCEKDDIPFEDCIMDILTEWQSSHSQPLPSLYPSY

>AfCdcA

MEHSSPLAAMQPPSVMFGHCFRSDAPTSYPTFGPRSLGPNFNFKELSMKKASGDYFGMNLVRGSSPTA  
SLAADLSQNFHIDQSPQLATPRRSLFSSNLFGHGSGREDAMTTPPLPSSSPAPIMDTMEMSPLPHKPPFIAA  
KEIELNPPTPGGSPIDSPMMSAAPSPLQESPLMGPKEDKQERKRPGLRPSLARTKAQSFQLGMKAPAPES

QAPPFKFQTRGKTSLASTSLEDMFGESPQRERPIARNNSSTLLNNPRLRPPLGSGSNGSHARGNGSPSAA  
SIRKSSHPLMRPRKQRRSLSMFEHPEEVIAEKEANYTTNAPLQSIDVDTTPSLQLPHFIPEDSADTLPRIDKT  
ILVDLMDGKYNDRFDHIMVVDCRFEYEGGHINGAVNYNDKEYLAAQLFADPKPRTALVLHCEYSAHRAP  
IMAKYIRHRDRAFNVDPHYPLTYPDMYILDGGYSAFFAEHRSLCFPQNYVEMNAKEHEFACERGLGKVKQR  
SKLNRAQTFAFGQHSPQMEDSPTGRCRNNPGERTRFLDSPFEGTPSSRGPGRMMLSY

>MIH1

MNNIFHGTEDECANEDVLSFQKISLKSFPFGKKKNIFRNVQTFKSKSKHSNVDDDLINKENLAFDKSPLLTNH  
RSKEIDGSPSPNIKQLGHRDEL DENENENDDIVLSMHFASQTLQSPTRNSSRRSLTNNRDNDLLSRIKYPGSPQ  
RSSFSRSRSLSRKPSMNSSSSRRVQRQDGKIPRSSRKSQKFSNITQNTLNFTSASSSPLAPNSVGVKCFE  
SCLAKTQIPYYYDDRNSNDFPRISPETLKNILQNNMCESFYNSCRIIDCRFEYETGGHIIINSVNIHSRDELEYE  
FIHKVLHSDTSNNNTLPTLLIIHCEFSSHRGPSLASHLRNCDRIINQDHYPKLFYPDILILDGGYKAVFDNFPELC  
YPRQYVGMNSQENLLNCEQEMDKFRRESKRKFATKNNSFRKLASPSNPFFYRDSHQSTTMASSALSFRFE  
PPPKLSLNHRRVSSGSSLNSESSTGDENFFPILSKSSMSSNSNLSTSHMLLMDGLDTPSYFSFEDERGNHQQV  
SGDEEQDGDFTFVGSREDLPRPARRSLFPSLETEDKK

>AfYphA

MAKPLSEKSSNSLRAKASESSSLGYRPLQETSLESEIIHTEKLPPNFGDVVKGVYRSSFQPWHFQALKKLGL  
RMIVTLVEGDYTDQDHQVFLKENGIEHRRILILANKDPTIRTPDHVVNRVLEIMLNKTNHPLLLHCNKGKHRT  
GCIVGCFRKVQGWDMPAIRKEYLNFSLPKSRPLDERFIELFDDTRLGPLAVSSGASSWPAGVMLDPLREEV  
EDENTPRGSRHSSASVFHKSDAM

>AfPtyA

MATNLPRQSSVDLDSADRPFDNIINFRDVGRSVNHLMGSRILKEGVLFRSARLDDASERDRRRLADELHIST  
VLDLRSMTEHQMATRKRGEDALDPEQPSLPSEANEHLVEIPGVQRSLISLTGRAFERALLWRDLWYNLIR  
VLALVASGYRTEAVTIIGQQVMAPRGLIGLQDQLDSSSTAEVREIFELLVSPAAYPVLVHCTQGKDRTGLIVLL  
LLLLPEVSADAIAADYVKSEPELVVEFEERMKEIRVLGLNEEYTKCPPEFTQQIRAHLDKYGKGGVGYLTSVGI  
DREKQELIRQQLLA

>PTP2

MDRIAQQYRNGKRDNNGNRMASSAISEKGHIQVNQTRTPGQMPVYRGETINLSNLPQNQIKPCKDLDDV  
NIRRNNSNRHSKILLDLGAGPNTNSFLGNTNAKDITVLSLPLPSTLVKRSNYPFENLLKNYLGSDKEYIEFTKII  
KDYDIFIFSDFSRISSCLKTTFLIEKFKKFKICHFFPSPYLKFFLLEGSLNDSKAPSLGKNKNCILPKLDLNLNVNL  
TSRSTLNLRIIPPNDNSKIFLQSLKDLIHYSPLNSLQKFFQFNMPADLAPNDTILPNWLKFCVSKENEKVLK  
KLFNNFETLENFEMQRLEKCLKFKKPLHQKQLSQKQRGPOSTDDSKLYSLTSLQRQYKSSLSNIQKNQKLLK  
LIIPKNNSTSSPSLSSDDTIMSPINDYELTEGIQSFTKNRYSNILPYEHSRVKLPHPKPPAVSEASTTETKTDKS  
YPMCVPDAKNHCKPNDYINANYLKLTIQINPDFKYIATQAPLPSTMDDFWKVITLNKVKVIISLNSDDELNLR  
KWDIYWNNSYSNHTIKLQNTWENICNINGCVLRVQVKKTAPQNDNISQDCDLPNGDLTITMAVSEP  
FIVYQLQYKNWLDSCGVDMMNDIILKHKVKNLNFNPQSFTSLEKDVCKPDLIDDNNSSELHLDTANSSPLLH  
CSAGCGRTGVFVTLDFLLSILSPTTNHSNKIDVWNMTQDLIFIIVNELRKQRISMVQNLQYIACYEALLNYFA  
LQKQIKNALPC

>AfPpgA

MPGLPGRFDFVRLVFTLLQEAYHLTASIDLDECIERLYRKELLADTVIEAICAKAKELLMKESNVVHIRAPVTVV  
GDIHQFFDMIEIFKIGGFCPNTNYLFLGDYVDRGLFSVETISLLVCLKLRYPQRVHLIRGNHESRGVTQSYGF  
YTECARKYGNANVWHYFTDMFDFLTLVSVINDQIFCVHGGGLSPSIHSIDQIKIIDRFREIPHEGPMADLVWSD  
PDTERDEFSLSPRGAGYTFGAQVVRKFLEVNSMSHILRAHQLCQEGYQVLYDDRLSTVWSAPNYCYRCGNL  
ASVLEVSDTGERYFNIFDAAPENEIHRGEQQAQQNKDGGQSPVIDYFL

>AfDspB

MHFSFAMSSICASLSLPPTHGSLNTGAALQLWKSASAVFSNPTALLSLTRNFQILDQDGS LN WGNVAVFT  
TCIIMAGCGFLSLLRRKSGKRSSGRKRFRREGIQIHDSKTSPEPTTSSEEDYDSSGSLRNGTDAALPQEKV  
TKHHEQSADALATDPGILKKRSSHYSYTSIATYPSIRTFSPHPHMDKLPKPTPIPLLVFVHGLGGSLAQFSF  
LLTSLANVGPCFGIDLPGCGLSTFAPT DWDAYTVEALAE LLFTAIEQHRDREAGQKVVLIGHSMGCSLSALLA  
SSASSIGSELKEHILGLVAISPRASPPTPDEVASYRLLRIPESIFD MWRYWDRRGGLHSASVNRLVGT DADP  
DTRELQMRYNKQSKTPVWRRMAWGTLPTYNKDGKAIGGIPGEEVWAGVKTSVLLVAGESDAVTKPAELR  
KLLKFFGEVGPHADVGADGSAIIPDASETHDTVSAAYDRFAHEEEYGLEAQTSEKTIIDDCRASCEKKRAVKT  
VILPAPASHALLYDRATYRTL AGIIQDFLSQHIDERLSL GWQLQYMNTSGKWDVKNLAKWKKVTPVSQRIA  
GTFVALKMLREVDEEHN PVLFSQKYRDQIYAVIDISYENPVYNPASLEKGGIHYQKHPTVSKIPPTADEVRDFI  
ALVDRLQNEISEKMKMSGNPDGPRPVVGVHCHYGFNRTGFLIVSYLIERLGRVQDAIDEFERQRPPGIRHG  
HFIDTLFVRYCVGLKRAPTL

>SDP1

MNIYTSPT RTPNIAPKSGQRPSLPMLATDERSTDKESPNE DREFVPCSSLDVRRRIYPKGPLLVLPEKIYLYSEPK  
ELLFPD VVINVAEEANDLRMQVPAVEYHHYRWEHDSQIALDLPSLTSIIHAAT TKREKILIHCCGLSR SATL  
IIAYIMKYHNL SLRHSYDLLKSRADKINPSIGLIFQLMEWEVALNAKTNVQANSYRKVP
