# Supplementary material for: Systematic Global Analysis of Genes Encoding Protein Phosphatases inAspergillus fumigatus
Source: Oxford University Press journal article supplement (doi:10.1534/g3.115.016766), 2015-05-12
Supplement: 016766_tables1.pdf [file 016766_tables1.pdf]

**Table S1 Oligonucleotide sequences of the primers used in this study**

|                             |                                                            |
|-----------------------------|------------------------------------------------------------|
| Afu5g06700 pRS426 5fw       | 5'-GTAACGCCAGGGTTTTCCAGTCACGACGGCCTCCTCCTCCAACGCAC-3'      |
| Afu5g06700 pyrG 5rv         | 5'-GCACTTAAGGACAAGAAGCTCTGCAAAGCGTAGTAATCGACCG-3'          |
| Afu5g06700 pyrG 3fw         | 5'-CACTTGAAGGACAAGAAGCTCTATGTCTCTCTAGGCTTATGCG-3'          |
| Afu5g06700 pRS426 3rv       | 5'-GCGGTTAACAATTTCTCTCTGGAAACAGCCGCCAGTTCCTCAATGATAACC-3'  |
| Afu5g06700 ORF fw           | 5'-ATGGCTGCATCCGATCTCGAGG-3'                               |
| Afu5g06700 ORF rv           | 5'-TCAGCTTTGTAATTTGAGCAGACACG-3'                           |
| Afu5g06700 5'ext fw         | 5'-CTGCAGTCTAACGTAGCGG-3'                                  |
| Afu5g06700_hygromycin 3rv   | 5'TCCTGTGTGAAATTGTTATCCGCTGAAATGACGATGGCTCATGAGC-3'        |
| Afu5g13740 pRS426 5fw       | 5'-GTAACGCCAGGGTTTTCCAGTCACGACGTTGTTCTCTGATGGACTCGAA-3'    |
| Afu5g13740 pyrG 5rv         | 5'-GCCTCCTCTCAGACAGAATTTTGCTGTTTGCTCTGAGGAG-3'             |
| Afu5g13740 pyrG 3fw         | 5'-GCATTGTTTGAGGCGAATTCTTGGGCTTAGCATGGCGTGGCG-3'           |
| Afu5g13740 pRS426 3rv       | 5'-GCGGTTAACAATTTCTCTCTGGAAACAGCTATCGGAACCATGCTGCATTGC-3'  |
| Afu5g013740 ORF fw          | 5'-CCTCTATCTAGTTCTGCATCGGGCG-3'                            |
| Afu5g13740 ORF rv           | 5'-GTTGCATTATCACTCATCGGGCCC-3'                             |
| Afu5g0137340_hygromycin 3rv | 5'-TCCTGTGTGAAATTGTTATCCGCTGGTTAGGACTGGGGAGGTTAATTG-3'     |
| Afu5g12010 pRS426 5fw       | 5'-GTAACGCCAGGGTTTTCCAGTCACGACGATTGTATCACACAAGATCACC-3'    |
| Afu5g12010 pyrG 5rv         | 5'-GCACTTAAGGACAAGAAGCTCTTCTTCGTAACCCATACGACG-3'           |
| Afu5g12010 pyrG 3fw         | 5'-CACTTGAAGGACAAGAAGCTTGCACCTTATCTTCCTTCTAAG-3'           |
| Afu5g12010 pRS426 3rv       | 5'-GCGGTTAACAATTTCTCTCTGGAAACAGCCTTCAACCTCAGCTTCATATC-3'   |
| Afu5g12010 ORF fw           | 5'-ATGACTGTTGATTTTCTCCGCA-3'                               |
| Afu5g12010 ORF rv           | 5'-TCACATGGTATCACTGCGCGCA-3'                               |
| Afu5g12010 5'ext fw         | 5'-GACACTCTAGAACACAAAGCTG-3'                               |
| Afu5g12010_hygromycin 3rv   | 5'-TCCTGTGTGAAATTGTTATCCGCTCAGCGATGATGTTTCATGTTTCATC-3'    |
| Afu4g00720 pRS426 5fw       | 5'-GTAACGCCAGGGTTTTCCAGTCACGACGGATTGGACTATATAACTGGAGCTG-3' |
| Afu4g00720 pyrG 5rv         | 5'-CAGTGCCTCCTCTCAGACAGAATCTTACTGTCCGTCGAAGACCGC-3'        |
| Afu4g00720 pyrG 3fw         | 5'-GAGCATTGTTTGAGGCGAATTCATGCTTGACGTACGGATCATG-3'          |

|                           |                                                             |
|---------------------------|-------------------------------------------------------------|
| Afu4g00720 pRS426 3rv     | 5'-GCGGTAAACAATTTCTCTCTGGAAACAGCGAGCGCAGATGCAAGTAAGTGG-3'   |
| Afu4g00720 5' UTR ext fw  | 5'-ATGTGCTCTGCCAGATCAGCC-3'                                 |
| Afu6g06650 pRS426 5fw     | 5'-GTAACGCCAGGGTTTTCCAGTCACGACGGCAAGTAGACAGTCATGAAGATA-3'   |
| Afu6g06650 pyrG 5rv       | 5'-CAGTGCCTCCTCTCAGACAGAATTTACGACATCGCTTTTGCCGTCC-3'        |
| Afu6g06650 pyrG 3fw       | 5'-GAGCATTGTTTGAGGCGAATTCGTAATTATGGGCGGATACAATGG-3          |
| Afu6g06650 pRS426 3rv     | 5'-GCGGTAAACAATTTCTCTCTGGAAACAGCCTTCGATATTCTTCGCGGTCGCC-3'  |
| Afu6g06650 5' UTR ext fw  | 5'-CCGCGTCGAAGAGCAGCCCTCTAG-3'                              |
| Afu2g03890 pRS426 5fw     | 5'GTAACGCCAGGGTTTTCCAGTCACGACGGTTTTTCATTTGCTTGAAGTGACAG-3'  |
| Afu2g03890 pyrG 5rv       | 5'-CAGTGCCTCCTCTCAGACAGAATTTGGTATCTGAGGTTAGTTTTAGAAT- 3'    |
| Afu2g03890 pyrG 3fw       | 5'-GAGCATTGTTTGAGGCGAATTCAGCGAAGGCAGAGCAGGCCTC- 3'          |
| Afu2g03890 pRS426 3rv     | 5'-GCGGTAAACAATTTCTCTCTGGAAACAGCAGCGTCAGAGTGTCAATGGTGG-3'   |
| Afu2g03890 ORF fw         | 5'-GCAATACCATCTTGTCTACCTCAG-3'                              |
| Afu2g03890 ORF rv         | 5'-TAGGTGTTTTGACCGTCCAATAGAG-3'                             |
| Afu2g03890 5' UTR ext fw  | 5'-GGAAAGGGAGGTACGGAGTG-3'                                  |
| Afu2g03890_hygromycin 3rv | 5'-TCCTGTGTGAAATTGTTATCCGCTTTGACCGGAGAAAGGCACCTTCTC-3'      |
| Afu2g03950 pRS426 5fw     | 5'-GTAACGCCAGGGTTTTCCAGTCACGACGGCCAGCAAATCCCAGCAACCGG-3'    |
| Afu2g03950 pyrG 5rv       | 5'-GCCTCCTCTCAGACAGAATTAAGTCAAGGCGTGGATATCTGC- 3'           |
| Afu2g03950 pyrG 3fw       | 5'-GCATTGTTTGAGGCGAATTCGCCTTTTACAACATGCTACCGCC- 3'          |
| Afu2g03950 pRS426 3rv     | 5'-GCGGTAAACAATTTCTCTCTGGAAACAGCGGGTGTATCTGAAGATCTCACTGC-3' |
| Afu2g03950 ORF fw         | 5'-ATGGGTCAATCGCATTCCAAGGGC-3'                              |
| Afu2g03950 ORF rv         | 5'-TTAGCGACTGATGCCCCATGATGT-3'                              |
| Afu2g03950 5'ext fw       | 5'-GATCAACAACACTACTCAGCCC-3'                                |
| Afu2g03950_hygromycin 3rv | 5'-TCCTGTGTGAAATTGTTATCCGCTCCCGATAACCGCCTAGAATGGATGG-3'     |
| Afu1g06860 pRS426 5fw     | 5'GTAACGCCAGGGTTTTCCAGTCACGACGCCTGCGACCTGTCCCAGTTTCTTC-3'   |
| Afu1g06860 pyrG 5rv       | 5'-CAGTGCCTCCTCTCAGACAGAATTGAACTTGCAGTAACGTTTCAGG- 3'       |
| Afu1g06860 pyrG 3fw       | 5'-GAGCATTGTTTGAGGCGAATTCATCTTCTACATGGTCTTCACC- 3'          |
| Afu1g06860 pRS426 3rv     | 5'-GCGGTAAACAATTTCTCTCTGGAAACAGCACTTGCTTCTTCCAAAAAGCAC-3'   |

|                           |                                                             |
|---------------------------|-------------------------------------------------------------|
| Afu1g06860 ORF fw         | 5'-AGACTT TCCGTACTGCTCGTCGTG-3'                             |
| Afu1g06860 ORF rv         | 5'-AGCTTGGCTTTCTGATTTTCCTC-3'                               |
| Afu1g06860 5' UTR ext fw  | 5'-GCGATTGCCGAACGACGAGTG -3'                                |
| Afu1g06860_hygromycin 3rv | 5'-TCCTGTGTGAAATTGTTATCCGCTGGCCACCCTGAGATGAACTCAGTG-3'      |
| Afu1g09280 pRS426 5fw     | 5'-GTAACGCCAGGGTTTTCCAGTCACGACGTAGGACAAAGTAGATCGGATCG-3'    |
| Afu1g09280 pyrG 5rv       | 5'-GCCTCCTCTCAGACAGAATCACGAATAGGCGGCAACCAG- 3'              |
| Afu1g09280 pyrG 3fw       | 5'-GCATTGTTTGAGGCGAATTCGTTCTTCTCCTCGATCTGGTC-3'             |
| Afu1g09280 pRS426 3rv     | 5'-GCGGTTAACAATTTCTCTCTGGAAACAGCCTTGTCTCGAACTACCAGTAG-3'    |
| Afu1g09280 ORF Fw         | 5'-ATGCGGACCTGTGGGG-3'                                      |
| Afu1g09280 ORF Rv         | 5'-CTACGAGGAGGCAGACTTCTCCG-3'                               |
| Afu1g09280_hygromycin 3rv | 5'-TCCTGTGTGAAATTGTTATCCGCTCCCAGGAAAGCCCC-3'                |
| Afu1g09460 pRS426 5fw     | 5'-GTAACGCCAGGGTTTTCCAGTCACGACGGCCTGATATTCCTGTTAGAACGG-3'   |
| Afu1g09460 pyrG 5rv       | 5'-CAGTGCCTCCTCTCAGACAGAATCTTCCAACACGCCCCACGGGAG- 3'        |
| Afu1g09460 pyrG 3fw       | 5'-GAGCATTGTTTGAGGCGAATTCGATGAAGAATTGGACACGGG- 3'           |
| Afu1g09460 pRS426 3rv     | 5'-GCGGTTAACAATTTCTCTCTGGAAACAGCCCGCGTCAAGGCTGCCATTGCC-3'   |
| Afu1g09460 ORF fw         | 5'-GAATATCCTATCTTCCCGAGTC-3'                                |
| Afu1g09460 ORF rv         | 5'-ATATTTCTCCTTACCTCTCCGCAG-3'                              |
| Afu1g09460_hygromycin 3rv | 5'-TCCTGTGTGAAATTGTTATCCGCTACTTAAGTCCAGTCTTCTGCGC-3'        |
| Afu5g13340 pRS426 5fw     | 5'-GTAACGCCAGGGTTTTCCAGTCACGACGCCAATTCTAAGCTCTCAGGTC-3'     |
| Afu5g13340 pyrG 5rv       | 5'-CAGTGCCTCCTCTCAGACAGAATTCTGTTCAGCAACCCACCCTGG- 3'        |
| Afu5g13340 pyrG 3fw       | 5'-GAGCATTGTTTGAGGCGAATTCTGGAAGTACATAAGTGCGATGC- 3'         |
| Afu5g13340 pRS426 3rv     | 5'-GCGGTTAACAATTTCTCTCTGGAAACAGCGGGATATCTGACTCCAGCTGC-3'    |
| Afu5g13340 ORF fw         | 5'-TCCTCGAGCCCACCAAAGATAA-3'                                |
| Afu5g13340 ORF rv         | 5'-TGGACTGACTCAACCTTATTCGG-3'                               |
| Afu5g13340 5' UTR ext fw  | 5'- GGACGAGATTGTTGAGTTCG-3'                                 |
| Afu1g04790 pRS426 5fw     | 5'-GTAACGCCAGGGTTTTCCAGTCACGACGCGCAGACAAAGTACAGAGTAGGTGC-3' |
| Afu1g04790 pyrG 5rv       | 5'-CAGTGCCTCCTCTCAGACAGAATCACGGAATCAGCAATACCGG- 3'          |

|                           |                                                             |
|---------------------------|-------------------------------------------------------------|
| Afu1g04790 pyrG 3fw       | 5'-GAGCATTGTTTGAGGCGAATTCTCTCTGTAACCTTAACTGTTCCCGG- 3'      |
| Afu1g04790 pRS426 3rv     | 5'-GCGGTTAACAATTTCTCTCTGGAAACAGCGTCTTCTTTAGGTGTCGTCATCG-3'  |
| Afu1g04790 5' UTR ext fw  | 5'-CCAGACATTGTCGACTATTGACCG-3'                              |
| Afu1g04790_hygromycin 3rv | 5'- TCCTGTGTGAAATTGTTATCCGCTGCTGGTCCCACACGTCTATATG-3'       |
| Afu1g13040 pRS426 5fw     | 5'GTAACGCCAGGGTTTTCCCAGTCACGACGTTAGCTATGAATTGACCCATATTTG-3' |
| Afu1g13040 pyrG 5rv       | 5'-CAGTGCCTCCTCTCAGACAGAATTATTGCGGAACAGTCTTTTCG-3'          |
| Afu1g13040 pyrG 3fw       | 5'-GAGCATTGTTTGAGGCGAATTCTTAGCGTGAATGATCTGCCTTGC-3'         |
| Afu1g13040 pRS426 3rv     | 5'-GCGGTTAACAATTTCTCTCTGGAAACAGCGCGTGCCGGCCATCTACGTCTG-3'   |
| Afu1g13040 5' UTR ext fw  | 5'-GCCTGTCTATGTTTCGTCGACTTG-3'                              |
| Afu1g13040_hygromycin 3rv | 5'-TCCTGTGTGAAATTGTTATCCGCTATGAGGAAGAAATGGGAAAGGAACG-3'     |
| Afu2g01880 pRS426 5fw     | 5'GTAACGCCAGGGTTTTCCCAGTCACGACGGTATGGATTATCTGACAGCTGG-3'    |
| Afu2g01880 pyrG 5rv       | 5'-CAGTGCCTCCTCTCAGACAGAATTGTACAGGTGTGCAGATTACTCG-3'        |
| Afu2g01880 pyrG 3fw       | 5'-GAGCATTGTTTGAGGCGAATTCTTCTGATCTGAGGATGGCATAAC-3'         |
| Afu2g01880 pRS426 3rv     | 5'-GCGGTTAACAATTTCTCTCTGGAAACAGCTTCTCAGCCGATCCGCTCAGTC-3'   |
| Afu2g01880 ORF fw         | 5'-ATGGCTACGGTGTGGTACAGC-3'                                 |
| Afu2g01880 ORF rv         | 5'-GCCCTGCTTCTTCTCCAAGTACTC-3'                              |
| Afu2g01880 5' UTR ext fw  | 5'-TTGACTGAGCAGCTTCGGCGC-3'                                 |
| Afu2g01880_hygromycin 3rv | 5'-TCCTGTGTGAAATTGTTATCCGCT-3'                              |
| Afu2g02760 pRS426 5fw     | 5'GTAACGCCAGGGTTTTCCCAGTCACGACGCGGGTCTCTACAGTTTTATGATG-3'   |
| Afu2g02760 pyrG 5rv       | 5'-CAGTGCCTCCTCTCAGACAGAATCCAAAACATAAGCATCCCAAAG-3'         |
| Afu2g02760 pyrG 3fw       | 5'-GAGCATTGTTTGAGGCGAATTCACACTGCCTTAATGGTTTTTAAGG- 3'       |
| Afu2g02760 pRS426 3rv     | 5'-GCGGTTAACAATTTCTCTCTGGAAACAGCTTTCCCCTTGCTGACATGCGGG-3'   |
| Afu2g02760 5' UTR ext fw  | 5'-CAGCTGGAAGATCACCTCAATG-3'                                |
| Afu2g02760_hygromycin 3rv | 5'- TCCTGTGTGAAATTGTTATCCGCTCACGACATCAAAGCCTGCTTTGG-3'      |
| Afu3g10970 pRS426 5fw     | 5'GTAACGCCAGGGTTTTCCCAGTCACGACGCCTACTTCTTCTTTGCAGGTCT-3'    |
| Afu3g10970 pyrG 5rv       | 5'-CAGTGCCTCCTCTCAGACAGAATCTTGCCGACGCGATCCTTTGG-3'          |
| Afu3g10970 pyrG 3fw       | 5'-GAGCATTGTTTGAGGCGAATTCCGAGCATGGATGAAGCACTCCGA-3'         |

|                           |                                                             |
|---------------------------|-------------------------------------------------------------|
| Afu3g10970 pRS426 3rv     | 5'-GCGGTTAACAATTTCTCTCTGGAAACAGCGGTGCGGGCGGTTCCGGAGAGTG-3'  |
| Afu3g10970 ORF fw         | 5'-AAA ATC GAT ACG AGT GTC CAG GC-3'                        |
| Afu3g10970 ORF rv         | 5'-CGG GCT CCA ACT CAG GTT TAT-3'                           |
| Afu3g10970 5'UTR ext fw   | 5'-GCTGGCCATCGAGACTTTGGTC-3'                                |
| Afu3g10970_hygromycin 3rv | 5'-TCCTGTGTGAAATTGTTATCCGCT-3'                              |
| Afu3g12250 pRS426 5fw     | 5'GTAACGCCAGGGTTTTCCCAGTCACGACGGTCAACAAGCGAGTCATGCCC-3'     |
| Afu3g12250 pyrG 5rv       | 5'-CAGTGCCTCCTCTCAGACAGAATTGTGCTCTTAAGATGGCAAAAAC-3'        |
| Afu3g12250 pyrG 3fw       | 5'-GAGCATTGTTTGAGGCGAATTCCATTCCCTTCGACGTGCCGGC -3'          |
| Afu3g12250 pRS426 3rv     | 5'-GCGGTTAACAATTTCTCTCTGGAAACAGCGCCCATCTTCGTCATCTTCGTC-3'   |
| Afu3g12250 5'UTR ext fw   | 5'-GCTGATTGGGTATGTGATCACTCG-3'                              |
| Afu3g12250_hygromycin 3rv | 5'-TCCTGTGTGAAATTGTTATCCGCTCTTTCAGAGTTGATTCCGGTGCC-3'       |
| Afu5g11690 pRS426 5fw     | 5'GTAACGCCAGGGTTTTCCCAGTCACGACGGTTTGCTAAGAGACGCTCCTCC-3'    |
| Afu5g11690 pyrG 5rv       | 5'-CAGTGCCTCCTCTCAGACAGAATATTCAATGACAGCTGTGCAGTTCG-3'       |
| Afu5g11690 pyrG 3fw       | 5'-GAGCATTGTTTGAGGCGAATTCTTGCTTTCCTTGACTGCTTTGG -3'         |
| Afu5g11690 pRS426 3rv     | 5'-GCGGTTAACAATTTCTCTCTGGAAACAGCACTGGATAAAGCTACAAGTGAAG-3'  |
| Afu5g11690 ORF fw         | 5'-ATGGCTACGGTGTGGTACAGC-3'                                 |
| Afu5g11690 ORF rv         | 5'-GAATTCCAAGCATCGGTCAATTCC-3'                              |
| Afu5g11690 5'UTR ext fw   | 5'-GATAATGGGAAGAGAATACAGG -3'                               |
| Afu4g07000 pRS426 5fw     | 5'GTAACGCCAGGGTTTTCCCAGTCACGACGTGCTCTCCGTTTTGAAGTGCTCACC-3' |
| Afu4g07000 pyrG 5rv       | 5'-CAGTGCCTCCTCTCAGACAGAATCGTAAGGTTTCTTTGAGACAGATG-3'       |
| Afu4g07000 pyrG 3fw       | 5'-GAGCATTGTTTGAGGCGAATTCTGGATGTGGCACACTTTGATTGAC-3'        |
| Afu4g07000 pRS426 3rv     | 5'-GCGGTTAACAATTTCTCTCTGGAAACAGCATTACAGAGGAGCCGAAGAGG-3'    |
| Afu4g07000 5'UTR ext fw   | 5'-GATGCTGGCGTTGGGCTTGGACG-3'                               |
| Afu4g07000_hygromycin 3rv | 5'-TCCTGTGTGAAATTGTTATCCGCT-3'                              |
| Afu4g04710 pRS426 5fw     | 5'-GTAACGCCAGGGTTTTCCCAGTCACGACGCTTGGCTGCCATTGTTAGAGTT-3'   |
| Afu4g04710 pyrG 5rv       | 5'-CAGTGCCTCCTCTCAGACAGAATTGGATCCTTTTGTTCGAATCC-            |
| Afu4g04710 pyrG 3fw       | 5'-GAGCATTGTTTGAGGCGAATTCCTCAAGCGCTTCCATTCATATAAC-3'        |

|                           |                                                            |
|---------------------------|------------------------------------------------------------|
| Afu4g04710 pRS426 3rv     | 5'-GCGGTAAACAATTTCTCTCTGGAAACAGCAGCGCGAAATGTTCAAAACAGAA-3' |
| Afu4g04710 5' UTR ext fw  | 5'-CGACTGATGATGCGCCCCGGG-3'                                |
| Afu1g03540 pRS426 5fw     | 5'-GTAACGCCAGGGTTTTCCAGTCACGACGCCTTTCTGACCGCCACATGTGC-3'   |
| Afu1g03540 pyrG 5rv       | 5'-CAGTGCCTCCTCTCAGACAGAATGACAGATATAAATATACCTTGGGTCA-3'    |
| Afu1g03540 pyrG 3fw       | 5'-GAGCATTGTTTGAGGCGAATTCTGTCTTCTATTGCACTTTTCTGTG-3'       |
| Afu1g03540 pRS426 3rv     | 5'-GCGGTAAACAATTTCTCTCTGGAAACAGCTCCGATTCTGAACCAATCCTGCC-3' |
| Afu1g03540 5' UTR ext fw  | 5'-CGTGGTGTACTCGCCAAGTATGC-3'                              |
| Afu8g04580 pRS426 5fw     | 5'-GTAACGCCAGGGTTTTCCAGTCACGACGTGTCTTGAAGGGTGCATCATC-3'    |
| Afu8g04580 pyrG 5rv       | 5'-GCCTCCTCTCAGACAGAATCGGCAAAGAGCAGGATCGTCACC-3'           |
| Afu8g04580 pyrG 3fw       | 5'-GCATTGTTTGAGGCGAATTCACGTCTTGAGTTAATATGCGTTTTG-3'        |
| Afu8g04580 pRS426 3rv     | 5'-GCGGTAAACAATTTCTCTCTGGAAACAGCCAAGATTCAGCGGAACCACAGG-3'  |
| Afu8g04580 ORF fw         | 5'-GATCCTGCTGGCCTCCTCCCGT-3'                               |
| Afu8g04580 ORF rv         | 5'-GCAAGATTCATGACCTCGACCCTCTTC-3'                          |
| Afu8g04580_hygromycin 3rv | 5'-TCCTGTGTGAAATTGTTATCCGCTGCTTCTCTGTGTCTTGGAGTGC-3'       |
| Afu6g11470 pRS426 5fw     | 5'-GTAACGCCAGGGTTTTCCAGTCACGACGCGGGATCTTGGTCAATTGTACC-3'   |
| Afu6g11470 pyrG 5rv       | 5'-GCCTCCTCTCAGACAGAATGGTGCGGGTGCGGACGAACG-3'              |
| Afu6g11470 pyrG 3fw       | 5'-GCATTGTTTGAGGCGAATTCCTAGCATGCTTGATGGTCTG-3'             |
| Afu6g11470 pRS426 3rv     | 5'-GCGGTAAACAATTTCTCTCTGGAAACAGCCCTGATTATTCCATTCCCGC-3'    |
| Afu6g11470 ORF fw         | 5'-ATGGTGGACAACAAGATCCCTGAGCCGGG-3'                        |
| Afu6g11470 ORF rv         | 5'-GAGGTATTCTACAAGAAGTACTCGCTGCGGCCCG-3'                   |
| Afu6g11470 5' ext fw      | 5'-CCAGCCCTCCGACGGCCGCC-3'                                 |
| Afu1g15800 pRS426 5fw     | 5'-GTAACGCCAGGGTTTTCCAGTCACGACGGTTGATCTTCTGCTGCGGC-3'      |
| Afu1g15800 pyrG 5rv       | 5'-GCACTTAAGGACAAGAAGTTTCTTGCTGTTTGGATTACC-3'              |
| Afu1g15800 pyrG 3fw       | 5'-CACTTGAAGGACAAGAAGTGCACGAGTCATTAGTACCCCC-3'             |
| Afu1g15800 pRS426 3rv     | 5'-GCGGTAAACAATTTCTCTCTGGAAACAGCTTGGAGAAGTCGCCCTG-3'       |
| Afu1g15800 ORF fw         | 5'-ATGGAATCCTGGGCCTGCATAC-3'                               |
| Afu1g15800 ORF rv         | 5'-TCATCGCCTGGAAGTGCAGCGG-3'                               |

|                           |                                                           |
|---------------------------|-----------------------------------------------------------|
| Afu1g15800 5'ext fw       | 5'-ACGTTGCCGGTGTGAACTTC-3'                                |
| Afu1g15800_hygromycin 3rv | 5'-TCCTGTGTGAAATTGTTATCCGCTCGTACTTATCGCCAACTTTACATA-3'    |
| Afu4g07080 pRS426 5'fw    | 5'-GTAACGCCAGGGTTTTCCAGTCACGACGGTCTTCAAGATGCCCAGTCATAC-3' |
| Afu4g07080 pyrG niiA 5'rv | 5'-GGAGCTCGTATTTTTCCCTGCGCTGATGCCACGTTATAGCCGAT-3'        |
| Afu4g07080 niiA orf fw    | 5'-GGCGTTGAGACTTCGTCACGATGGCTATGAACAAGATCCC-3'            |
| Afu4g 07080 pRS426 orf rv | 5'GCGGATAACAATTTACACAGGAAACAGCTGAATCATCTGGAGCTCTCAT-3'    |
| Afu1g4950 pRS426 5'fw     | 5'-CAGGGTTTTCCAGTCACGACGTTCTGGCCTGCATCAGACTC-3'           |
| Afu1g4950 pyrG niiA 5'rv  | 5'-GGAGCTCGTATTTTTCCCTGCTGCTGATTCTCGAGACAAAAA -3'         |
| Afu1g4950 niiA orf fw     | 5'-CTGGCGTTGAGACTTCGTCACGATGGCTGATCAAGAAGTGGATC-3'        |
| Afu1g4950 pRS426 orf rv   | 5'- CAATTTACACAGGAAACAGCTTACTTCTTCTTTGGTTTGC GCG-3'       |
| Afu6g10830 pRS426 5'fw    | 5'-CAGGGTTTTCCAGTCACGACGTTTGTATCCTGCCGGCCTCG -3'          |
| Afu6g10830 pyrG niiA 5'rv | 5'- GGAGCTCGTATTTTTCCCTACAACGTGCAAATGTGGAGGAG -3'         |
| Afu6g10830 niiA orf fw    | 5'-CTGGCGTTGAGACTTCGTCACGATGGAAAATAACATGGAAATTGATCC-3'    |
| Afu6g10830 pRS426 orf rv  | 5'-CAATTTACACAGGAAACAGCTCACAGGAAGTAATCAGGTGTACG-3'        |
| Afu3g11410 pRS426 5fw     | 5'-GTAACGCCAGGGTTTTCCAGTCACGACGGGCCAAGTAATGTGTCTCTGC-3'   |
| Afu3g11410 pyrG niiA 5'rv | 5'- GGAGCTCGTATTTTTCCCTGCTCTTGTATCGGGCAGGCGAGG-3'         |
| Afu3g11410 niiA orf fw    | 5'-CTGGCGTTGAGACTTCGTCACGATGCTTCTTCGGTTACCGCCC-3'         |
| Afu3g11410 pRS426 orf rv  | 5'-CAATTTACACAGGAAACAGCCTACCCGTTCTCAGCTGCAATC-3'          |
| RT-actin-F                | 5'-CTGTGCAGATTGTCGCCAGGG-3'                               |
| RT-actin-R                | 5'-GTCCAGATTAAGCTGTCGCGC-3'                               |
| RT-catA-F                 | 5'-CACCGACGATCCACTTCTCCAAGG-3'                            |
| RT-catA-R                 | 5'-GACGGTTGATTGGCAGCTCTTCCC-3'                            |
| RT-dprA-F                 | 5'-GTCCAACATGATACATAAGGTG-3'                              |
| RT-dprA-R                 | 5'-GTCGGCGGCCCTAGAGTCATGG-3'                              |
| RT-dprB-F                 | 5'-GTCTGGACTGATGCACAAGGTC-3'                              |
| RT-dprB-R                 | 5'-GTGGTCTGGTGGGTGCCGTGG-3'                               |
| RT-2g03890-F              | 5'-GTTTCGCAATACCATCTTGTCTACC-3'                           |

|              |                                      |
|--------------|--------------------------------------|
| RT-2g03890-R | 5'-CGATCCTCCTGAAAAGGTCGAGCC-3'       |
| RT-3g10970-F | 5'-GGCGCATCCCGCCATCAAATCGATACG-3'    |
| RT-3g10970-R | 5'-CGGAACCGGATACCACATCGAAACCACC-3'   |
| RT-5g13340-F | 5'-GTTCAAGTGGCTCCTCGAGCCCACCC-3'     |
| RT-5g13340-R | 5'-CGTCGGTCTTGACGGTCAGGGACGGG-3'     |
| RT-5g13740-F | 5'-GGGTCCTCTATCTAGTTCTGCATCGG-3'     |
| RT-5g13740-R | 5'-GTTGCGAAGGTCGAGATCCTAGGGCG-3'     |
| RT-1g03540-F | 5'-GCACTTCTCATTGCAATGAGCTCTATC-3'    |
| RT-1g03540-R | 5'-CGGACTTCCAGAGCTGTAAAGCAGCG-3'     |
| RT-1g09280-F | 5'-CAGCATGGAGGACGCCCATGCTGCGG-3'     |
| RT-1g09280-R | 5'-TATCTCCACCATGACCGTCATATACACC-3'   |
| RT-1g09460-F | 5'-GAACTCGTTGAATATCCTATCTTCCCG-3'    |
| RT-1g09460-R | 5'-CCGATTTCTCCCTGCGAACGCGACC-3'      |
| RT-3g12250-F | 5'-GTCTGGATATATGGGCGGACCCGGCC-3'     |
| RT-3g12250-R | 5'-GAGCTCCTAGGACATTTCTGGACAGG-3'     |
| RT-4g04710-F | 5'-GTCCACTACGGCTGACCAGAGACAATCACC-3' |
| RT-4g04710-R | 5'-GGTATCTCGCAGTGATAATAAAGACGCTGG-3' |
| RT-1g06860-F | 5'-GCGTCGCCTGGCCCTCCAGACTTTCCG-3'    |
| RT-1g06860-R | 5'-CCTAGAGGCTGATGATTATGGGAGAACG-3'   |
| RT-1g13040-F | 5'-GACTCCGGCTCGTTGCATTGAGGCTTCG-3'   |
| RT-1g13040-R | 5'-ATTGGCAGACGAGTCTTTGCACTTCC-3'     |
| RT-5g11690-F | 5'-GGCTACGGTGTGGTACAGCAAACGC-3'      |
| RT-5g11690-R | 5'-GGTAAATGTTTGGTGGCACCAGGCGACGGG-3' |
| RT-4g07000-F | 5'-GGCTAAACCACTTAGTGAGAAGTCTTC-3'    |
| RT-4g07000-R | 5'-GCAAAGGACGATAACCAAGGGAAGAAGAC-3'  |
| sakA-U-F     | 5'-GGTGAAGCTAACGTAGGTTTGAATCAGG-3'   |
| sakA-D-R     | 5'-GTCGAGCTGTCGTGAACAGGCGATTCC-3'    |
