# Supplementary material for: Systematic Global Analysis of Genes Encoding Protein Phosphatases inAspergillus fumigatus
Source: Oxford University Press journal article supplement (doi:10.1534/g3.115.016766), 2015-05-12
Supplement: 016766_tables2.pdf [file 016766_tables2.pdf]

**Table S2 Taq Man probes used in this work**

| <b>Assay Name</b> | <b>Forward Primer Sequence</b> | <b>Reverse Primer Sequence</b> | <b>Reporter 1 Sequence</b> |
|-------------------|--------------------------------|--------------------------------|----------------------------|
| <b>βTUB</b>       | GTGAGGCTGAAGGCTGTGA            | GGTACCACCACCGAGAGAGT           | CCTCCAGGGCTTCCAG           |
| <b>SIDA</b>       | GTGCGCAACAATTTTCGGATGTA        | GAGCTGCTGGGATCAGACTTC          | CTTCCCCGTAAGCCAC           |
| <b>SIDC</b>       | GGGCAAGGCGATGTTAGC             | CCGAGCATAGCCTTCGATCAATC        | CTGTTGCGAGTTCTCC           |
| <b>SIDG</b>       | CGAGTCTCGCCGAAGTTCTG           | AAGGCATAGCGAACCATCTCC          | CCTCCTTCGCGTACCC           |
| <b>CCCA</b>       | CTTGGATCTCAGCCATCACACT         | AAGTAAGGTATGAGCGGGATGAAC       | CCTCCCACGAAATAC            |
| <b>SREA</b>       | TGGTTCCTGTCCTGGTGGA            | TTGTAGGCAGGGCAACCAT            | TCCCTCGGCTCCGCC            |
| <b>HAPX</b>       | CCAGACGTCTTGATACCACCAA         | GGCAAATCGGGAAGTGAAATCAATTT     | CCGAGCCTCAGATCAA           |

**Reporter 1 Dye:** FAM

**Reporter 1 Concentration (μM):** 5

**Reporter 1 Quencher:** NFQ

**Forward Primer Concentration (μM):** 18

**Reverse Primer Concentration (μM):** 18
